# Supplementary material for: Striosomal ghrelin receptor activity controls reward-cost integration
Source: Research Square preprint supplement (doi:10.21203/rs.3.rs-10122988/v1), 2026-06-25
Supplement: Supplementary file 1 [file 39e2e5f4a5aafb1485086061.pdf]

|    |                                                                          |           |
|----|--------------------------------------------------------------------------|-----------|
| 1  | <b>1 Table of Contents</b>                                               |           |
| 2  | <b>1 Animals</b> .....                                                   | <b>5</b>  |
| 3  | <b>1.1 Breeding</b> .....                                                | <b>5</b>  |
| 4  | <b>1.2 Rigor and reproducibility</b> .....                               | <b>5</b>  |
| 5  | <b>2 Surgery</b> .....                                                   | <b>7</b>  |
| 6  | <b>2.1 Animal allocations for surgical procedures</b> .....              | <b>7</b>  |
| 7  | <b>2.2 Surgical procedure</b> .....                                      | <b>7</b>  |
| 8  | 2.2.1 Anesthesia and analgesia .....                                     | 7         |
| 9  | 2.2.2 Stereotaxic preparation and surgical setup .....                   | 8         |
| 10 | <b>2.3 DREADD virus injections</b> .....                                 | <b>8</b>  |
| 11 | <b>2.4 Surgery for GCaMP injection and in-vivo calcium imaging</b> ..... | <b>9</b>  |
| 12 | 2.4.1 GCaMP VIRUS INJECTION .....                                        | 9         |
| 13 | 2.4.2 GRIN lens implantation .....                                       | 9         |
| 14 | <b>3 Pre-experimental procedures</b> .....                               | <b>10</b> |
| 15 | <b>3.1 Reagents and preparation</b> .....                                | <b>10</b> |
| 16 | 3.1.1 Ibutamoren Mesylate preparation and storage .....                  | 10        |
| 17 | 3.1.2 Clozapine-N-oxide .....                                            | 10        |
| 18 | 3.1.3 Human acyl-ghrelin .....                                           | 10        |
| 19 | <b>3.2 Drug administration</b> .....                                     | <b>10</b> |
| 20 | <b>3.3 Animal acclimation to experimental setting</b> .....              | <b>11</b> |
| 21 | <b>4 Decision making task battery</b> .....                              | <b>11</b> |
| 22 | <b>4.1 Experimental task set up</b> .....                                | <b>11</b> |
| 23 | 4.1.1 Animal tracking .....                                              | 11        |
| 24 | 4.1.2 Decision making task battery set up .....                          | 11        |
| 25 | <b>4.2 Non-conflict decision making tasks procedures</b> .....           | <b>12</b> |
| 26 | 4.2.1 Food alone task .....                                              | 12        |
| 27 | 4.2.2 Toy alone task .....                                               | 12        |
| 28 | 4.2.3 Light alone task .....                                             | 12        |
| 29 | 4.2.4 Maze alone task .....                                              | 13        |
| 30 | <b>4.3 Conflict DM task procedures</b> .....                             | <b>13</b> |
| 31 | 4.3.1 Food+light .....                                                   | 13        |
| 32 | 4.3.2 Toy+light task .....                                               | 13        |
| 33 | <b>4.4 Food consumption task</b> .....                                   | <b>13</b> |
| 34 | 4.4.1 Food consumption task procedure .....                              | 13        |
| 35 | <b>4.5 Behavioral experimental designs</b> .....                         | <b>14</b> |
| 36 | 4.5.1 Exp. 1: Evaluate DM with 2x IBU manipulation .....                 | 14        |
| 37 | 4.5.2 Exp. 2: Evaluate DM with 10x IBU manipulation .....                | 14        |
| 38 | 4.5.3 Exp. 3: Feeding consumption in home cage and conflict tasks .....  | 14        |
| 39 | 4.5.4 Exp. 4: DREADD Manipulations .....                                 | 15        |

|    |            |                                                                                                  |           |
|----|------------|--------------------------------------------------------------------------------------------------|-----------|
| 40 | <b>4.6</b> | <b><i>Data processing for behavioral tasks</i></b> .....                                         | <b>15</b> |
| 41 | <b>4.7</b> | <b><i>Data normalization</i></b> .....                                                           | <b>16</b> |
| 42 | <b>5</b>   | <b>immunohistochemistry following GHSR-activation</b> .....                                      | <b>16</b> |
| 43 | <b>5.1</b> | <b><i>Histological quality control</i></b> .....                                                 | <b>16</b> |
| 44 | <b>5.2</b> | <b><i>General tissue preparation, immunolabeling and microscopy</i></b> .....                    | <b>16</b> |
| 45 | <b>5.3</b> | <b><i>Image processing and analysis</i></b> .....                                                | <b>17</b> |
| 46 | 5.3.1      | Neuroanatomical parcellation using NeuroTrace .....                                              | 17        |
| 47 | 5.3.2      | Striatal subdivision into 4 compartments .....                                                   | 17        |
| 48 | 5.3.3      | Striosomes and matrix segmentation using MOR immunoreactivity .....                              | 18        |
| 49 | 5.3.4      | cFos (marker for neuronal activity) quantification .....                                         | 18        |
| 50 | 5.3.5      | pPDH (marker for neuronal inactivity) Quantification .....                                       | 18        |
| 51 | 5.3.6      | TH quantification and Dopaminergic SNc segmentation .....                                        | 19        |
| 52 | 5.3.7      | GHSR quantification: localization of the growth hormone secretagogue receptor .....              | 19        |
| 53 | 5.3.8      | Biotinylated ghrelin (BGHR) quantification .....                                                 | 19        |
| 54 | 5.3.9      | Identification / segmentation of DREADD virus in striatum .....                                  | 20        |
| 55 | <b>5.4</b> | <b><i>Histological experimental design</i></b> .....                                             | <b>20</b> |
| 56 | 5.4.1      | Exp 5: Whole-brain mapping of IBU induced activity .....                                         | 20        |
| 57 | 5.4.2      | Exp 6: Dose-dependent effects of IBU on striatal activity .....                                  | 21        |
| 58 | 5.4.3      | Exp 7: Dose-dependent effects of IBU on LHb, ARC, and daSNc .....                                | 21        |
| 59 | 5.4.4      | Exp 8: GHSR expression and biotinylated ghrelin (BGHR) binding within striatum .....             | 22        |
| 60 | 5.4.5      | Exp 9: DREADD manipulations .....                                                                | 22        |
| 61 | <b>5.5</b> | <b><i>Detailed immunohistochemical protocols</i></b> .....                                       | <b>23</b> |
| 62 | 5.5.1      | Perfusion .....                                                                                  | 23        |
| 63 | 5.5.2      | cFos immunohistochemistry across 50 brain regions (excluding striatum) .....                     | 24        |
| 64 | 5.5.3      | cFos IHC in striosome and matrix compartments .....                                              | 25        |
| 65 | 5.5.4      | cFos, pPDH, BGHR, MOR in striatum .....                                                          | 27        |
| 66 | 5.5.5      | IHC for GHSR expression in striatal compartments .....                                           | 28        |
| 67 | 5.5.6      | GHSR and biotinylated-ghrelin localization in striosomes .....                                   | 30        |
| 68 | 5.5.7      | cFos in LHb, ARC .....                                                                           | 31        |
| 69 | 5.5.8      | IHC of cFos and pPDH in dopaminergic neurons of SNc .....                                        | 33        |
| 70 | 5.5.9      | GCamp in Striatum .....                                                                          | 34        |
| 71 | 5.5.10     | Oprm1-Cre inhibitory DREADD IHC .....                                                            | 36        |
| 72 | 5.5.11     | Oprm1-Cre excitatory DREADD .....                                                                | 37        |
| 73 | <b>6</b>   | <b>IN VIVO CALCIUM IMAGING</b> .....                                                             | <b>39</b> |
| 74 | <b>6.1</b> | <b><i>Optimization of Cre-dependent GCaMP expression</i></b> .....                               | <b>39</b> |
| 75 | <b>6.2</b> | <b><i>Calcium imaging experimental set up</i></b> .....                                          | <b>39</b> |
| 76 | <b>6.3</b> | <b><i>Calcium imaging recording sessions following GHSR activation</i></b> .....                 | <b>40</b> |
| 77 | <b>6.4</b> | <b><i>Calcium imaging recording processing</i></b> .....                                         | <b>40</b> |
| 78 | <b>6.5</b> | <b><i>Exp 10: Calcium imaging of GHSR activation after IBU and aGHR administration</i></b> ..... | <b>40</b> |
| 79 | <b>7</b>   | <b>Rabies-assisted monosynaptic tracing</b> .....                                                | <b>41</b> |
| 80 | <b>7.1</b> | <b><i>Intracranial surgery and tissue preparation</i></b> .....                                  | <b>41</b> |
| 81 | 7.1.1      | Helper virus injection for TRIO strategy .....                                                   | 41        |
| 82 | 7.1.2      | Helper virus injection for SNc tracing .....                                                     | 41        |

|     |             |                                                                                                 |           |
|-----|-------------|-------------------------------------------------------------------------------------------------|-----------|
| 83  | 7.1.3       | RVAG injections for TRIO experiment .....                                                       | 41        |
| 84  | 7.1.4       | RVAG injections for SNc tracing experiment.....                                                 | 42        |
| 85  | 7.1.5       | Transcardial perfusion fixation .....                                                           | 42        |
| 86  | 7.1.6       | Cryostat sectioning .....                                                                       | 42        |
| 87  | <b>7.2</b>  | <b><i>Histological analysis for retrograde tracing .....</i></b>                                | <b>42</b> |
| 88  | 7.2.1       | Striatal Immunohistochemistry .....                                                             | 42        |
| 89  | 7.2.2       | Histological localization of site sections.....                                                 | 43        |
| 90  | <b>7.3</b>  | <b><i>Microscopy, image processing, and analysis .....</i></b>                                  | <b>43</b> |
| 91  | <b>7.4</b>  | <b><i>Exp 11: Monosynaptic tracing of striosomal circuit analysis.....</i></b>                  | <b>43</b> |
| 92  | <b>8</b>    | <b>Modeling decision-MAKING .....</b>                                                           | <b>43</b> |
| 93  | <b>8.1</b>  | <b><i>“Decision-space” model.....</i></b>                                                       | <b>43</b> |
| 94  | <b>8.2</b>  | <b><i>Dimension of the decision-space based on striosome-&gt;LHb activity.....</i></b>          | <b>44</b> |
| 95  | <b>8.3</b>  | <b><i>Context- and task-dependent effects on approach/avoid.....</i></b>                        | <b>46</b> |
| 96  | <b>8.4</b>  | <b><i>Ability to perform tasks depending on striosome-&gt;LHb activity.....</i></b>             | <b>46</b> |
| 97  | <b>8.5</b>  | <b><i>Computational Modeling Data and Code Availability .....</i></b>                           | <b>47</b> |
| 98  | <b>9</b>    | <b>Motor Analysis .....</b>                                                                     | <b>47</b> |
| 99  | <b>9.1</b>  | <b><i>Video Acquisition and Preprocessing .....</i></b>                                         | <b>47</b> |
| 100 | <b>9.2</b>  | <b><i>Pose Estimation with DeepLabCut .....</i></b>                                             | <b>47</b> |
| 101 | <b>9.3</b>  | <b><i>Estimation of trajectory curvature .....</i></b>                                          | <b>49</b> |
| 102 | 9.3.1       | Code location and execution .....                                                               | 49        |
| 103 | 9.3.2       | Input data and normalization of pose trajectories. ....                                         | 49        |
| 104 | 9.3.3       | Curvature computation for trajectories.....                                                     | 50        |
| 105 | 9.3.4       | Key hyperparameters for trajectory curvature function. ....                                     | 50        |
| 106 | <b>9.4</b>  | <b><i>Quantification of locomotor velocity .....</i></b>                                        | <b>50</b> |
| 107 | 9.4.1       | Code location and execution. ....                                                               | 50        |
| 108 | 9.4.2       | Input data and normalization of pose trajectories. ....                                         | 50        |
| 109 | 9.4.3       | Velocity computation.....                                                                       | 50        |
| 110 | 9.4.4       | Key hyperparameters of velocity function.....                                                   | 51        |
| 111 | <b>9.5</b>  | <b><i>Quantification of head–body angle (radians).....</i></b>                                  | <b>51</b> |
| 112 | 9.5.1       | Code location and execution. ....                                                               | 51        |
| 113 | 9.5.2       | Input data and normalization of pose trajectories. ....                                         | 51        |
| 114 | 9.5.3       | Computation of head–body angle. ....                                                            | 51        |
| 115 | 9.5.4       | Key hyperparameters of head–body angle function. ....                                           | 52        |
| 116 | <b>9.6</b>  | <b><i>Analysis of detailed movement metrics .....</i></b>                                       | <b>52</b> |
| 117 | 9.6.1       | Computational Modeling Data and Code Availability .....                                         | 53        |
| 118 | <b>10</b>   | <b>Data deposition .....</b>                                                                    | <b>54</b> |
| 119 | <b>11</b>   | <b>Supplementary text .....</b>                                                                 | <b>62</b> |
| 120 | <b>11.1</b> | <b><i>Supplementary note 1: Ghrelin’s effect on the decision-space. ....</i></b>                | <b>62</b> |
| 121 | <b>11.2</b> | <b><i>Supplementary note 2: Movement data supports our policy-IG model of dopamine.....</i></b> | <b>63</b> |
| 122 | <b>11.3</b> | <b><i>Supplementary note 3: Implications for neuropsychiatric disorders .....</i></b>           | <b>63</b> |

|     |             |                                                                                                            |            |
|-----|-------------|------------------------------------------------------------------------------------------------------------|------------|
| 123 | <b>11.4</b> | <b><i>Supplementary note 4: Limitations</i></b> .....                                                      | <b>63</b>  |
| 124 | <b>12</b>   | <b>Supplementary Figures</b> .....                                                                         | <b>65</b>  |
| 125 | <b>13</b>   | <b>Tables</b> .....                                                                                        | <b>89</b>  |
| 126 | <b>13.1</b> | <b><i>Table S1: Abbreviations</i></b> .....                                                                | <b>89</b>  |
| 127 | <b>13.2</b> | <b><i>Table S2: Reagents</i></b> .....                                                                     | <b>91</b>  |
| 128 | <b>13.3</b> | <b><i>Table S3: Detailed Statistical Analysis</i></b> .....                                                | <b>96</b>  |
| 129 | <b>13.4</b> | <b><i>Table S4: Anatomical Region names and coordinates</i></b> .....                                      | <b>130</b> |
| 130 | <b>13.5</b> | <b><i>Table S5: Model Interpretations of selected experimental studies (Related to Note S1) ...</i></b>    | <b>133</b> |
| 131 | <b>13.6</b> | <b><i>Table S6: Model prediction of disorders coinciding with ghrelin changes (Related to Note S3)</i></b> |            |
| 132 |             | <b>134</b>                                                                                                 |            |
| 133 | <b>13.7</b> | <b><i>Table S7: DOIs</i></b> .....                                                                         | <b>135</b> |
| 134 | <b>14</b>   | <b>References</b> .....                                                                                    | <b>144</b> |
| 135 |             |                                                                                                            |            |
| 136 |             |                                                                                                            |            |

## 137 **1 ANIMALS**

138 All animal handling and surgical procedures were reviewed and approved by the University of  
139 Texas at El Paso Institutional Animal Care and Use Committee (IACUC; protocol # 24-10-043),  
140 Intramural Research Program (IRP)-NIDA IACUC (#23-BNRB-204) and Icahn School of Medicine  
141 at Mount Sinai (#IPROTO202600000015). Both Long-Evans rats and transgenic CRISPR-based  
142 Oprm1-Cre knock-in rats were used across experiments (see **Fig. 3A** for validation)<sup>1</sup>.

143  
144 Rats were maintained on a 12:12 h light/dark cycle unless otherwise noted. Breeding rats were  
145 housed on a standard light cycle, while rats used for behavioral experiments were maintained on  
146 a reversed light cycle. Rats were housed either individually or in pairs depending on experimental  
147 requirements. Experiments were conducted across five distinct animal colonies. First, Long-  
148 Evans rats (purchased from Envigo at 4 weeks of age) were used for behavioral characterization  
149 and IBU manipulation studies, as well as for histological dilution experiments (**Fig. 1-2**). Second,  
150 an initial colony of 24 Oprm1-Cre rats (Cre: n=11; WT: n=13) was obtained from the breeding  
151 program of IRP-NIDA at 3–5 months of age. These rats were used for a subset of excitatory  
152 DREADD experiments. Third, this initial cohort was used to establish a breeding colony at UTEP.  
153 Offspring derived from this colony were used for most of the subsequent experiments, including  
154 all inhibitory DREADD manipulations and in vivo calcium imaging experiments using  
155 the Inscopix system (**Fig. 3-4**). Finally, Tyrosine Hydroxylase (TH)-Cre (breeding program of IRP-  
156 NIDA) rats were used for rabies-based circuit tracing experiments performed in parallel studies at  
157 NIDA (**fig. S9**).

### 158 159 **1.1 Breeding**

160 From the 24 Oprm1-Cre rats received from NIDA, six breeding pairs were established. Pairings  
161 were arranged to maximize genetic heterogeneity and avoid inbreeding; no half-sibling pairings  
162 were permitted. Each breeding pair consisted of one Wild-type (WT) and one heterozygous  
163 Oprm1-Cre parent. Pairs were housed together for two weeks in a dedicated breeding room  
164 maintained on a 12:12 hour light/dark cycle and were monitored daily for signs of aggression or  
165 pregnancy. If aggression was observed, pairs were separated immediately. After the two-week  
166 pairing period, all rats were single-housed. Once pups were born, they underwent daily  
167 monitoring. At three weeks of age, pups were weaned and moved to the experimental holding  
168 room. During weaning rats were genotyped by hole-punching either the left or right ear (done in  
169 a manner to distinguish double-housed cage mates from each other) and samples were sent to  
170 Transnetyx for genotyping for the *Oprm1-iCre* gene. Rats were habituated shortly after weaning  
171 to minimize stress and fear.

### 172 173 **1.2 Rigor and reproducibility**

174 All in vivo experiments were designed, conducted, analyzed, and reported in accordance with the  
175 ARRIVE 2.0 (Animal Research: Reporting of In Vivo Experiments) guidelines. To maximize rigor  
176 and reproducibility, key findings were independently replicated using complementary  
177 experimental approaches, independent animal cohorts, technical replicates, and separate  
178 experimenters.

179 Behavioral findings were reproduced across two independent rat strains (Long-Evans and  
180 Oprm1-WT) to ensure that observed effects reflected GHSR activation rather than strain-specific  
181 characteristics. Behavioral outcomes were compared between strains and showed no significant  
182 strain-dependent differences. Animals were randomly assigned to treatment groups while

183 maintaining balanced representation of males and females. Behavioral experiments were  
184 conducted under blinded conditions whenever possible. One team (A.Y.M. and S.A.B.) prepared  
185 and administered injections, whereas a separate team (C.N.H., A.C.M.-D., C.N.O., and M.M.)  
186 performed behavioral testing without knowledge of treatment assignment. Automated tracking  
187 software quantified animal position and entries within behavioral zones. Feeding experiments  
188 were independently replicated by two separate research teams using independent animal cohorts  
189 and both rat strains. One set of experiments was performed by A.A.S. and N.F.R., whereas an  
190 independent replication was performed by A.Y.M., S.A.B., C.N.H., A.C.M.-D., C.N.O., and M.M.,  
191 yielding consistent behavioral outcomes across investigators and cohorts.

192 Histological findings were independently reproduced by two laboratories. Initial experiments were  
193 performed at UTEP (A.A.S. and N.F.R.), and the main finding that GHSR activation selectively  
194 increased striosomal cFos expression was independently replicated at NIDA (K.N. and H.-L. W.)  
195 using a separate animal cohort and an independent rat strain, providing biological replication  
196 across laboratories. Within UTEP, each immunohistochemical experiment was repeated in at  
197 least three independent staining runs, and quantitative analyses were performed only after  
198 confirming consistent labeling across technical replicates. Control and treatment groups were  
199 processed in parallel under identical conditions. Image quantification was performed using  
200 standardized automated image-processing pipelines with predefined thresholding and  
201 segmentation parameters applied uniformly across all samples, minimizing experimenter bias.

202 The histological observation of GHSR-mediated striosomal activation was further validated using  
203 an orthogonal experimental approach through in vivo calcium imaging, demonstrating that the  
204 same neuronal population exhibited dose-dependent functional activation in awake behaving  
205 animals.

206 Motor behavioral analyses were independently performed by two investigators (D.W.B. and A.G.),  
207 producing consistent results across analyses. Whenever feasible for in vivo experiments,  
208 treatment administration and experimental testing were performed by different investigators to  
209 maintain blinding throughout data collection.

210  
211 Finally, experimental findings were validated through computational modeling. D.W.B. developed  
212 a mathematical model based on the experimentally measured biological data, which confirmed  
213 the observed dose-dependent effects of GHSR activation on striosomal circuit activity and  
214 conflict-based decision-making.

215  
216 Finally, but importantly, the study benefited from integrating the expertise of senior authors across  
217 disciplines. I.R.W is an expert in virology, Y.S. and T.M.M. are experts in behavioral neuroscience  
218 and neurobiology; K.A.G. expert in endocrinology and circuit physiology, and A.F. is an expert  
219 in striosomal circuit physiology, behavioral, and computational neuroscience.

220 Together, these practices, including randomization, blinding, independent biological and technical  
221 replication, orthogonal validation, automated quantitative analyses, and predefined inclusion  
222 criteria, were incorporated throughout the study to maximize rigor and reproducibility.

223

## 224 **2 SURGERY**

### 225 **2.1 Animal allocations for surgical procedures**

226 All surgical procedures were performed in rats that had reached a minimum weight of 250-300 g  
227 and were at least 8 weeks of age at the time of surgery. Oprm1-Cre rats were used for both  
228 chemogenetic manipulation and calcium imaging experiments. For DREADD-based studies, rats  
229 were assigned to either an inhibitory or an excitatory group, and all underwent stereotaxic  
230 intracranial viral injections as described below. In addition, a separate cohort of Oprm1-Cre rats  
231 received a Cre-dependent calcium indicator (pGP-AAV-syn-FLEX-GCaMP7f-WPRE) followed by  
232 GRIN lens implantation for in vivo calcium imaging. Wild-type litter mates served as surgical  
233 controls and underwent the same stereotaxic procedures as experimental rats, including  
234 intracranial viral delivery, to control for surgical and viral exposure. Behavioral and imaging results  
235 are presented in **Fig. 3-4** and **fig. S5-8, S13**.

### 236 **2.2 Surgical procedure**

237 All Oprm1-Cre rats described above underwent stereotaxic surgery for intracranial viral delivery  
238 and, in a subset of rats, miniscope implantation. These rats received Cre-dependent viral  
239 constructs, including the calcium indicator pGP-AAV-syn-FLEX-GCaMP7f-WPRE for imaging  
240 experiments and chemogenetic vectors encoding excitatory (hM3Dq) or inhibitory (hM4Di)  
241 DREADD for functional manipulation. Viral expression and striosomal specificity were validated  
242 using immunohistochemistry (IHC) see section 5.4.5. Stereotaxic coordinates for each procedure  
243 are described in detail below. All reagents used are listed in detail in table S2.

#### 244 *2.2.1 ANESTHESIA AND ANALGESIA*

245 All surgical procedures were performed under isoflurane anesthesia (induction at 3%,  
246 maintenance initially at 2%, oxygen flow rate 2–2.5 L/min). Due to increased sensitivity to  
247 isoflurane in this Oprm1-Cre strain, rats were continuously monitored throughout the procedure  
248 for respiratory rate and depth. To stabilize anesthesia and reduce isoflurane requirements, rats  
249 received an intramuscular injection of ketamine (0.1 mL) prior to the start of surgery, after which  
250 isoflurane levels were reduced to ~1% for the remainder of the procedure. For surgeries  
251 exceeding 2 hours, an additional ketamine dose (0.1 mL, IM) was administered in the contralateral  
252 hindlimb.

253 At the start of surgery, rats received a bupivacaine injection (0.1ml subcutaneous, SQ) near  
254 incision site and a second SQ injection near abdomen of 5 mL Ringer's solution containing a half-  
255 dose of meloxicam (0.5 mg/kg). Body temperature was continuously monitored and maintained  
256 at ~37 °C using a heating pad. A reversal agent (atipamezole; Revertidine) was kept readily  
257 available throughout all procedures. In the event of respiratory suppression, rats were  
258 immediately removed from isoflurane and administered atipamezole (0.1 mL, IM), resulting in  
259 rapid recovery of respiration and stabilization prior to resuming monitoring.

260 For post-operative care, rats received meloxicam (1 mg/kg, SQ) and enrofloxacin (5 mg/kg, SQ)  
261 once daily for 3 days, including the day of surgery. These were administered in Ringer's solution,  
262 with additional subcutaneous fluids provided as needed to support recovery. Rats were monitored  
263 continuously during recovery until the return of the righting reflex and were assessed daily  
264 thereafter to ensure proper healing.

## 265 2.2.2 STEREOTAXIC PREPARATION AND SURGICAL SETUP

266 Following induction of anesthesia, rats were shaved and positioned in a stereotaxic frame (Kopf  
267 Instruments, Model 942) and secured using ear bars. The surgical site was sterilized using  
268 alternating applications of alcohol and iodine (3x). Ophthalmic ointment (Puralube; MWI,  
269 cat#027505) was applied to both eyes to prevent corneal drying during the procedure.

270 Once fully secured and prepared, a midline anterior–posterior incision was made along the scalp  
271 to expose the skull. The overlying connective tissue was carefully removed, and the skull surface  
272 was cleaned using sterile saline or hydrogen peroxide to improve visualization. Rats were  
273 positioned in a flat skull configuration by aligning bregma and lambda along both anterior-posterior  
274 and medial-lateral axes, and all stereotaxic coordinates were determined relative to bregma.

## 275 2.3 DREADD virus injections

276 Oprm1-Cre rats described above underwent stereotaxic DREADD viral injections for causal  
277 manipulation of striosomal activity (**Fig. 4, fig. S6-8, S13**). For inhibitory manipulations, Oprm1-  
278 Cre rats and Wild-type rats received a Cre-dependent inhibitory DREADD virus (pAAV-hSyn-DIO-  
279 HA-hM4D(Gi)-IRES-mCitrine; Addgene #50455), prepared at an initial titer of  $1 \times 10^{13}$  vg/mL and  
280 diluted 1:1 in sterile saline prior to injection. For excitatory manipulations, a separate cohort of  
281 Oprm1-Cre rats and Wild-type received a Cre-dependent excitatory DREADD virus (AAV8-hSyn-  
282 DIO-hM3D(Gq)-mCherry; Addgene #44361), prepared at an initial titer of  $4 \times 10^{12}$  vg/mL and  
283 similarly diluted 1:1 in sterile saline.

284 Following stereotaxic preparation described in section 2.2.1 bilateral viral injections were  
285 performed targeting the anterior dorsal striatum (AP +1.28 mm, ML  $\pm$ 1.8 mm, DV –3.7 mm relative  
286 to Bregma). Small craniotomies were made at the designated coordinates, and the dura mater  
287 was carefully removed to allow for viral delivery. Cre-dependent DREADD viral constructs  
288 encoding either excitatory (hM3Dq) or inhibitory (hM4Di) receptors were delivered bilaterally using  
289 a microsyringe. For each hemisphere, the injection needle was first lowered slightly beyond the  
290 target depth (DV –3.8 mm) and then raised to verify no obstruction by expelling a small volume of  
291 virus (“bubble check”) to ensure the needle was not clogged. The needle was then reinserted and  
292 positioned at the final injection depth (DV –3.7 mm), and 1  $\mu$ L of virus was infused at a rate of  
293 0.1  $\mu$ L/min. Following infusion, the needle was left in place for 10 min to allow for viral diffusion  
294 and to minimize backflow, after which it was slowly withdrawn. The same procedure was repeated  
295 for the contralateral hemisphere.

296 Following completion of viral injections, craniotomy sites were sealed using silicone elastomer  
297 (Kwik-Sil™, World Precision Instruments). The incision was closed using 5-0 sutures. Rats  
298 received SQ administration of Ringer’s solution (10 mL) containing meloxicam (1 mg/kg) and  
299 enrofloxacin (5 mg/kg) to support recovery.

300 Rats were maintained on a heating pad and closely monitored until the return of the righting reflex.  
301 Recovery times were modestly prolonged due to ketamine administration. Rats were monitored  
302 daily for 5 days following surgery to ensure proper healing and recovery. A minimum of 4 weeks  
303 was allowed for viral expression prior to the start of behavioral experiments, as described in  
304 section 4. All rats underwent perfusion and IHC to verify injection, as described in section 5.

## 305 **2.4 Surgery for GCaMP injection and in-vivo calcium imaging**

### 306 *2.4.1 GCaMP VIRUS INJECTION*

307 A subset of the Oprm1-Cre rats underwent a modified surgical procedure for in vivo calcium  
308 imaging. These rats received bilateral injections of a Cre-dependent calcium indicator virus (pGP-  
309 AAV-syn-FLEX-GCaMP7f-WPRE-GCaMP7f; Addgene #104492) targeting the anterior dorsal  
310 striatum. The virus was prepared at an initial titer of  $1 \times 10^{13}$  vg/mL and diluted 1:8 in sterile saline  
311 prior to injection. An initial concentration curve was performed to identify ideal concentration, as  
312 described in section 6.1.

313 Prior to performing any craniotomies, the skull surface was lightly scored in a cross-hatch pattern  
314 to improve adhesion, and 5–6 flat-top stainless steel screws were inserted epidurally to provide  
315 structural support for headcap fixation. Following this, bilateral viral delivery was performed  
316 targeting the anterior dorsal striatum (AP +1.5 mm, ML  $\pm$ 2.0 mm, DV –3.6 mm relative to bregma)  
317 using a microsyringe. For each hemisphere, the injection needle was first lowered slightly beyond  
318 the target depth (DV –3.7 mm) and then raised to verify no needle obstruction by expelling a small  
319 volume of virus (“bubble check”) to ensure the needle was not clogged. The needle was then  
320 reinserted and positioned at the final injection depth (DV –3.6 mm), and 1  $\mu$ L of virus was infused  
321 at a rate of 0.1  $\mu$ L/min. Following infusion, the needle was left in place for 10 min to allow for viral  
322 diffusion and to minimize backflow, after which it was slowly withdrawn. The same procedure was  
323 repeated for the contralateral hemisphere.

### 324 *2.4.2 GRIN LENS IMPLANTATION*

325 Following bilateral viral injections, a larger craniotomy was expanded over the right injection site  
326 to accommodate GRIN lens implantation. Dura mater was carefully removed under a surgical  
327 microscope. Exposed tissue was kept moist using sterile saline to maintain visibility. A sterile flat  
328 18-gauge needle was used to create a tract for lens placement. The needle was slowly lowered  
329 through the cortex until reaching striatum, identified by gray matter.

330 The GRIN lens (Inscopix, ProView Integrated Lens, 1.0 mm x 9.0 mm; cat#1050-00416) was  
331 sterilized, mounted on a custom holder, and positioned over the craniotomy. The lens was slowly  
332 lowered to a final depth approximately 100  $\mu$ m dorsal to the viral injection site (DV –3.5 mm  
333 relative to dura) at a controlled rate (~1 mm per 5 min). Once in position, the craniotomy was  
334 sealed using silicone elastomer (Kwik-Sil™, World Precision Instruments) to stabilize the implant.  
335 The GRIN lens and skull screws were then secured using dental cement (Metabond). An initial  
336 thin layer of liquid Metabond quick base (Patterson Dental, #NC1013606) was applied across the  
337 skull surface to promote adhesion, followed by additional layers mixed with Metabond tooth  
338 powder (Patterson Dental, #NC0877382) to build a stable headcap around the lens base and  
339 screws. Care was taken to avoid covering functional components of the implant during headcap  
340 construction, and the cement was allowed to fully cure. Excess skin surrounding the implant was  
341 trimmed as needed, and the remaining incision margins were closed using 5-0 sutures. The  
342 surgical site was treated with topical antibiotic ointment prior to recovery.

343 Rats received the same post-operative care described in the anesthesia and analgesia section  
344 2.2.1 and were allowed to recover for 5 days prior to further handling. After recovery, rats were  
345 monitored regularly, and imaging sessions were initiated approximately 4 weeks post-surgery to  
346 allow for sufficient viral expression. Imaging was performed every few days until stable calcium  
347 activity was observed. Rats were approximately 7 weeks post-surgery at the start of IBU imaging  
348 experiments, described in section 4.5.4.

### 349 **3 PRE-EXPERIMENTAL PROCEDURES**

#### 350 **3.1 Reagents and preparation**

##### 351 *3.1.1 IBUTAMOREN MESYLATE PREPARATION AND STORAGE*

352 Ibutamoren mesylate (IBU; MedChemExpress, HY-50844 table S2), a growth hormone  
353 secretagogue receptor (GHSR; ghrelin receptor) agonist with a prolonged half-life relative to  
354 endogenous ghrelin, was used to enable sustained modulation of ghrelin signaling during  
355 behavioral experiments. Stock powder was stored at  $-80^{\circ}\text{C}$  until use.

356 For experiments, IBU was reconstituted in sterile saline to generate working solutions ranging  
357 from 0.5 to 10 mg/mL, where solution concentration (mg/mL) matched the intended dose (mg/kg).  
358 For clarity, concentrations were expressed using an “x” notation, where 1x corresponds to  
359 1 mg/mL (1 mg/kg) and 10x corresponds to 10 mg/mL (10 mg/kg).

360 This approach allowed injection volume (mL) to scale directly with body weight (kg) (i.e., 1 mL/kg).  
361 For example, a 300 g rat received 0.3 mL, whereas an 800 g rat received 0.8 mL. Behavioral  
362 experiments primarily utilized 2x (2 mg/mL; 2 mg/kg) and 10x (10 mg/mL; 10 mg/kg) conditions,  
363 while histological analyses incorporated the full range of concentrations.

364 Fresh working solutions were maintained at  $4^{\circ}\text{C}$  during the day of use and kept cold throughout  
365 experimental procedures. For longer-term storage, reconstituted aliquots were stored at  $-20^{\circ}\text{C}$   
366 for up to one month.

##### 367 *3.1.2 CLOZAPINE-N-OXIDE*

368 Clozapine-N-oxide (CNO) (Medchem HY-17366, table S2) powder was stored at  $-20^{\circ}\text{C}$ . For  
369 preparation, 75 mg of CNO was first dissolved in 2.5 mL of 100% dimethyl sulfoxide (DMSO)  
370 (Sigma D8418) and then diluted in 22.5 mL of sterile saline. The solution was vortexed until fully  
371 mixed, protected from light, and used within 5 days of preparation. For DREADD experiments,  
372 CNO (3 mg/kg) was administered to activate Cre-dependent viral constructs in Oprm1-Cre rats  
373 and was also administered to Wild-type rats to control for nonspecific effects. Solution was stored  
374 at room temperature for up to 5 days, covered in foil.

##### 375 *3.1.3 HUMAN ACYL-GHRELIN*

376 To compare the effects of IBU with endogenous ghrelin signaling, acyl-ghrelin (Bachem, H-6795,  
377 table S2) was used. Acyl-ghrelin powder was stored at  $-80^{\circ}\text{C}$  for long-term storage. For  
378 experimental use, the peptide was reconstituted in 1 mL of Milli-Q water, aliquoted, and stored at  
379  $-80^{\circ}\text{C}$ . A fresh aliquot was thawed and used for each testing day to maintain peptide stability.

380 Acyl-ghrelin was administered via intraperitoneal (IP) injection at doses ranging from 4.3 to  
381 125  $\mu\text{g}/\text{kg}$ , with injection volumes adjusted based on body weight. These doses were selected to  
382 enable comparison with the longer-acting GHSR agonist IBU across a range of physiologically  
383 relevant concentrations.

#### 384 **3.2 Drug administration**

385 Injections were performed using sterile 1 mL syringes fitted with 26G needles. Drug volumes were  
386 adjusted based on body weight, and rats were weighed at least once per week to ensure accurate

387 dosing. Behavioral experiments were carried out 2 hours after IBU and/or CNO administration,  
388 and 15 mins post acyl-ghrelin injection. Perfusions for IHC were conducted 3.5 hours post IBU  
389 injections.

### 390 3.3 Animal acclimation to experimental setting

391 Before behavioral and in-vivo calcium imaging experiments, rats were transferred from the holding  
392 room to the experimental room using transport carts. Upon arrival, rats remained in their home  
393 cages for 3 minutes to acclimate to the environment. For behavioral experiments described in  
394 section 4, rats were placed into one of four behavioral arenas and allowed to acclimate for an  
395 additional 5 minutes prior to the start of the experiment. All behavioral trials were conducted in  
396 darkness.

## 397 4 DECISION MAKING TASK BATTERY

398

### 399 4.1 Experimental task set up

400 For all behavioral experiments, animals were randomly assigned to treatment groups before  
401 testing, with group allocations balanced to include comparable numbers of males and females  
402 when possible. Behavioral testing was performed under blinded conditions. On each day of  
403 testing, one team handled animals and administered injections, while a separate team ran  
404 behavioral tasks, without knowledge of the treatment condition. In addition, animal tracking and  
405 scoring of entries into reward zones were performed using automated tracking software. Lastly,  
406 on each day of testing, half of the animal received saline while the other half received treatment,  
407 and conditions were reversed after a 2-day washout period. This design ensured that saline and  
408 treatment groups were both tested on each experimental day, controlling for day-to-day variability  
409 in behavioral performance.

#### 410 4.1.1 ANIMAL TRACKING

411 Rats were run on behavior tasks in an open field arena. Behavior within the arena was captured  
412 using a Basler GenICam (Basler acA1300-60, table S2) mounted above the maze that recorded  
413 at a resolution of 720x576 at 25 frames per second and Noldus EthoVision XT 16 software; used  
414 to track movements/spatial location of the rats during task performance. To minimize distractions  
415 from external stimuli and contain the rats, the arenas are surrounded by walls made from polyvinyl  
416 chloride sheets (75cm x 64.5cm x 0.32cm). The maze floor was 3D printed with four different floor  
417 patterns (Radial, Horizontal, Grid, and Diagonal) as described in our previous publication<sup>2</sup>.  
418 Depending on task conditions, the available stimulus/stimuli were either placed in a corner or in  
419 the center of the arena. A region of interest (ROI) was created around the stimulus or stimuli for  
420 determining whether the rat interacted with/showed interest in the available factors across  
421 conditions. ROIs were set using the arena settings within the Noldus EthoVision XT version 16.0  
422 tracking software. For tasks which had a stimulus in the center of the arena, the ROI was set as  
423 a 4x4 square (each side measuring approximately 15.5cm), when the stimulus was placed in the  
424 corner, the ROI was defined by a curved section with a diameter of 15cm. The tracking software  
425 recorded animal entries into this region, and the data output (frequency of entries to the defined  
426 ROI) was analyzed to assess behavior.

427

#### 428 4.1.2 DECISION MAKING TASK BATTERY SET UP

429 Rats were habituated to an empty, unlit arena and to the experimenters for two weeks prior to  
430 task execution. Depending on the experimental condition, the stimulus or stimuli were then added  
431 to the maze. Rats were placed in the center of the arena, and their nose, center, and tail points

432 were identified using Noldus EthovisionXT tracking software. Each trial lasted 20 minutes, during  
 433 which rats were allowed to freely move. Stimuli (see sections 4.2-4.3 below) were secured to the  
 434 maze with zip ties at the predetermined region of interest (ROI). Two types of flooring were used,  
 435 depending on the rat strain. Long Evans rats were tested on a 3D-printed floor with four different  
 436 patterns that were spray-painted green using Rust-Oleum Gloss Neon Green lacquer paint to  
 437 improve detection. In contrast, Oprm1-Cre rats were tested on alternative flooring of similar  
 438 texture but darker in color, which provided better contrast for tracking. For tasks involving light, a  
 439 lamp was clamped to a corner of the arena and encased in aluminum foil to focus on the defined  
 440 region of interest (ROI). Light intensity in this ROI was measured at 500 lux (2335 lumens) using  
 441 an Amprobe Light Meter for all light-based tasks. For food-based tasks, all rats regardless of strain  
 442 were exposed to the food in their home cage for at least three days prior to testing. All toy-based  
 443 tasks were designed to assess responses to novelty. Therefore, rats were not pre-exposed to the  
 444 object. The object was a rodent stick chew toy purchased at PetSmart.  
 445

## 446 **4.2 Non-conflict decision making tasks procedures**

447 To determine the effects of IBU on decision-making processes, non-conflict tasks were designed  
 448 to independently assess exploratory behavior, food-directed motivation, novelty-seeking, and  
 449 avoidance behavior in the absence of competing stimuli or behavioral conflict.  
 450

### 451 *4.2.1 FOOD ALONE TASK*

452 A slice of apple, an appetitive food reward, was zip-tied to the center of the maze with no additional  
 453 stimuli present. Apples were weighed before and after each session, and a fresh slice was used  
 454 at the start of each new session. This task was performed across multiple experiments to assess  
 455 the effects of IBU on approach and consumption behaviors.  
 456

457 SAL v 2x IBU: Data are available at <https://doi.org/10.7910/DVN/DCB1IH>.

458 SAL v 10x IBU: Data are available at <https://doi.org/10.7910/DVN/OE73LI>

459 Striosomal manipulations: Data are available at <https://doi.org/10.7910/DVN/NTB2PG>.

460

### 461 *4.2.2 TOY ALONE TASK*

462 A novel toy was zip-tied to a corner of the maze with no additional stimuli present. This task was  
 463 performed across multiple experiments to assess the effects of IBU on approach and exploratory  
 464 behaviors in the context of novelty.  
 465

466 SAL v 2x IBU: Data are available at <https://doi.org/10.7910/DVN/YMYXO0>.

467 SAL v 10x IBU: Data are available at <https://doi.org/10.7910/DVN/OE73LI>.

468 Striosomal manipulations: Data are available at <https://doi.org/10.7910/DVN/NTB2PG>

469

### 470 *4.2.3 LIGHT ALONE TASK*

471 A corner of the maze was illuminated by a lamp held in place with a clamp on the wall of the maze.  
 472 Light was directed to the region of interest (ROI) using aluminum foil as a cost, and no additional  
 473 stimuli was present. This task was performed across multiple experiments to assess the effects  
 474 of IBU on cost-avoidance behaviors.  
 475

476 SAL v 2x IBU: Data are available at <https://doi.org/10.7910/DVN/JW2C3Q>.

477 SAL v 10x IBU: Data are available at <https://doi.org/10.7910/DVN/OE73LI>.

478 Striosomal manipulations: Data are available at <https://doi.org/10.7910/DVN/NTB2PG>.

479

## 480 4.2.4 MAZE ALONE TASK

481 To establish a baseline measure of approach behavior in the absence of external stimuli, rats  
 482 were allowed to freely explore an unlit open-field arena with no additional stimuli present during  
 483 the Maze Alone task. A randomly selected corner of the arena was designated as the region of  
 484 interest (ROI) for behavioral tracking. The purpose of this task was to quantify baseline approach  
 485 rates toward a neutral location and compare them to approach rates observed when a single  
 486 stimulus was present during the simple behavioral tasks (Food alone, Toy alone, and Light alone).  
 487 Approach rates across tasks were compared using a one-way ANOVA (fig. S1A; SAL: rats = 9, 5  
 488 males and 4 females).

489 Data are available at <https://doi.org/10.7910/DVN/OE73LI>

490

491

492 **4.3 Conflict DM task procedures**

493 To evaluate the effects of IBU on conflict-based decision-making, conflict tasks were designed to  
 494 determine whether IBU altered behavioral choice and approach behavior under conditions  
 495 requiring motivational tradeoff between reward-seeking and avoidance of an aversive stimulus.

496

## 497 4.3.1 FOOD+LIGHT

498 To test the effect of IBU on food-cost tradeoff, an apple slice was zip-tied to the corner of the  
 499 maze while simultaneously being illuminated by an aversive light (15 lux). Apples were weighed  
 500 before and after each session, and a fresh slice was used at the start of each new session. The  
 501 lamp was held in place by a clamp on the wall of the maze, and aluminum foil was used to direct  
 502 the light toward the ROI.

503

504 SAL v 2x IBU: Data are available at <https://doi.org/10.7910/DVN/0V6WKG>.

505 SAL v 10x IBU: Data are available at <https://doi.org/10.7910/DVN/OE73LI>.

506 Striosomal manipulations: Data are available at <https://doi.org/10.7910/DVN/NTB2PG>.

507

## 508 4.3.2 TOY+LIGHT TASK

509 To test the effect of IBU on novelty-cost tradeoff, a novel toy was zip-tied to the corner of the  
 510 maze, which was simultaneously illuminated by an aversive light (15 lux). The lamp was held in  
 511 place by a clamp on the wall of the maze, and aluminum foil was used to direct the light toward  
 512 the region of interest.

513

514 SAL v 2x IBU: Data are available at <https://doi.org/10.7910/DVN/ZUH9YY>.

515 SAL v 10x IBU: Data are available at <https://doi.org/10.7910/DVN/OE73LI>.

516 Striosomal manipulations: Data are available at <https://doi.org/10.7910/DVN/NTB2PG>.

517

518 **4.4 Food consumption task**

519 To confirm that IBU produced its expected effects, food consumption tasks were performed under  
 520 both home cage and task-based conditions. These experiments were designed to specifically  
 521 assess the effects of IBU on consummatory feeding behavior independent of exploratory  
 522 behavior, novelty-seeking, or conflict-based decision-making processes.

523

## 524 4.4.1 FOOD CONSUMPTION TASK PROCEDURE

525 At the beginning of each session, the standard chow (Teklad Global Irradiated 18% protein rodent  
 526 diet provided Laboratory Animal Resources Center) was removed from the home cage and  
 527 replaced with 40 grams of pre-weighed chow. Food consumption was measured over a four-hour

528 period, with chow being re-weighed at hourly intervals. The difference between the initial chow  
 529 weight and the chow remaining at each time point was recorded to determine cumulative intake  
 530 across the session. This task was conducted under 2x IBU, 10x IBU, aGHR conditions, as  
 531 described below.

532

533 IBU Food consumption in home cage: <https://doi.org/10.7910/DVN/GFLZYM>.

534 aGHR Food consumption in home cage: Data is available at <https://doi.org/10.7910/DVN/US8QTS>

535 Food alone task: Data are available at <https://doi.org/10.7910/DVN/GFLZYM>

536 Food+light task: <https://doi.org/10.7910/DVN/GFLZYM>

537

## 538 **4.5 Behavioral experimental designs**

### 539 *4.5.1 EXP. 1: EVALUATE DM WITH 2X IBU MANIPULATION*

540 Frist, to determine whether administration of 2x IBU altered performance across five behavioral  
 541 tasks, including both simple and conflict-based paradigms with varying levels of conflict, using the  
 542 same rats across all tasks. The full behavioral battery was independently replicated in two cohorts:  
 543 Long-Evans rats (LE: rats=11–16 per group) and Oprm1-WT rats (SAL: rats=14; 2x IBU: rats=14),  
 544 with each experimental group containing equal numbers of males and females (**Fig. 1C-D**). A  
 545 crossover design was used in which half of the cohort initially received 2x IBU and half received  
 546 saline. Following a minimum 2-day washout period, rats were re-tested under the opposite  
 547 condition. This design minimized inter-animal variability, enabled direct within-animal  
 548 comparisons across treatment conditions, and ensured that both treatment and control conditions  
 549 were represented on each testing day. For each behavioral task, raw non-normalized data were  
 550 initially analyzed independently using paired t-tests comparing SAL and 2x IBU conditions (**fig.**  
 551 **S1**). To enable comparisons across behavioral tasks with different measurement scales and  
 552 ranges, data were subsequently normalized using min-max normalization prior to cross-task  
 553 analyses (see 4.7 below; **Fig. 1C-D**).

554 Data are available at <https://doi.org/10.7910/DVN/OE73LI>.

555

### 556 *4.5.2 EXP. 2: EVALUATE DM WITH 10X IBU MANIPULATION*

557 In Exp. 1, we found that 2x IBU selectively altered performance during conflict-based tasks, with  
 558 little effect on simple tasks. To determine whether a higher dose of IBU produced broader  
 559 behavioral effects, a separate cohort of rats was tested under SAL (rats = 9; 5 males and 4  
 560 females) and 10x IBU conditions (rats = 10; 6 males and 4 females). Raw non-normalized  
 561 behavioral data were analyzed using two-sample t-tests to assess group differences (**fig. S2**).  
 562 And normalized data was used to compare across all tasks (**Fig. 1H**).

### 563 *4.5.3 EXP. 3: FEEDING CONSUMPTION IN HOME CAGE AND CONFLICT TASKS*

564 To determine changes in feeding behavior, food consumption experiments were conducted with  
 565 rats undergoing 2x and 10x IBU in their home cage and in conflict-based tasks. For home cage  
 566 feeding behavior, in the 2x IBU (**Fig. 1E**) and 10x IBU experiments (**fig. S2H**; SAL: rats=19; 2x  
 567 IBU: rats=19; 10x IBU: rats=19), a paired t-test was used to assess differences in home cage  
 568 food consumption between saline and 2x or 10x IBU rats. Values for the saline control group are  
 569 the same as those shown in **Fig. 1E**. To compare feeding behavior across different aGHR  
 570 concentrations, a one-way ANOVA was used to assess (**fig. S5F**; WT rats = 6-8) food

571 consumption under aGHR in home cage. Under 2x and 10x IBU conditions, a two-way ANOVA  
572 (**fig S5G**; WT-SAL rats=8-19) was used to compare feeding behavior across different IBU and  
573 aGHR doses.

574 Food consumption in home cage IBU: <https://doi.org/10.7910/DVN/GFLZYM>.

575 Food consumption in home cage IBU: Data is available at <https://doi.org/10.7910/DVN/US8QTS>

576

577 Food consumed during the light alone task was also measured where the weight (grams) of the  
578 apple was measured during the tasks and analyzed using unpaired t-tests in both 2x (**Fig. 1F**)  
579 and 10x (**fig. S2I**) IBU conditions (SAL: rats = 9-14; 2xIBU: rats = 14; 10x IBU: rats= 10) Food  
580 consumed during the Food+ light task was also measured and analyzed using unpaired t-tests in  
581 both 2x (**Fig. 1G**) and 10x IBU (**fig. S2J**) experiments (SAL: rats = 9-14; 2x IBU: rats = 14; 10x  
582 IBU: rats = 10).

583

#### 584 4.5.4 EXP. 4: DREADD MANIPULATIONS

585 Lastly, we examined whether striosomal manipulation altered decision-making performance  
586 across the five behavioral tasks. Oprm1-Cre rats used for behavioral testing were divided into four  
587 experimental groups: 1) CNO saline (CNO SAL; rats = 14), 2) WT 2x IBU (CNO IBU; rats = 14),  
588 3) inhibitory hM4D(Gi) (Inh; rats = 15), and 4) excitatory hM3D(Gq) (Exc; rats = 7–13) groups  
589 (**Fig. 4B**). All rats, including Oprm1-WT littermates, underwent stereotaxic surgery for viral  
590 targeting of striosomal neurons as described in Section 2.3. During behavioral testing, all  
591 experimental groups received CNO to control for nonspecific effects, in combination with either  
592 saline or 2x IBU treatment depending on the experimental condition. Wild-type rats were analyzed  
593 using a between-subjects design, whereas inhibitory and excitatory rats were tested twice under  
594 both saline and 2x IBU conditions while receiving CNO during all sessions. Raw behavioral data  
595 for each task were initially analyzed independently using two-sample (unpaired) t-tests to  
596 compare performance across experimental conditions (**fig. S7B-C**). To allow comparisons across  
597 behavioral tasks with different measurement scales, behavioral data were subsequently  
598 normalized prior to cross-task analyses (**Fig. 4D-E**). Full statistical results are provided in the  
599 Statistical Depository.

600 Data are available at <https://doi.org/10.7910/DVN/NTB2PG>.

#### 601 4.6 Data processing for behavioral tasks

602

603 The Noldus EthoVision software generated a 20-minute-long video (the duration of the task),  
604 along with raw data and statistics during the task. In the Export tab, both the raw data and statistics  
605 files were exported and saved to the appropriate folder on the computer. After saving the data,  
606 the Trial List in EthoVisionXT was reset in preparation for the next trial session. The statistics data  
607 included "Frequency" data, which represented the number of entries into the ROI, tracked by the  
608 system based on the rat's center point. This frequency data was then input into an Excel  
609 spreadsheet, where results from each group were compared.

610

611 When multiple rats were running in parallel, video files were split using a Python script  
612 ([https://github.com/atanugiri/DLC-Jupyter-  
613 Notebooks/blob/main/Python\\_scripts/split\\_videos\\_with\\_ffmpeg.py](https://github.com/atanugiri/DLC-Jupyter-Notebooks/blob/main/Python_scripts/split_videos_with_ffmpeg.py)). This process facilitated  
614 analysis of individual rats within each arena. The script generates four separate videos, one for  
615 each rat. These videos were manually checked and analyzed using Noldus EthoVision. Data was  
616 saved and input into an Excel spreadsheet for further analysis.

617  
618 README and analysis for Non-conflict tasks, Conflict tasks, and food consumption experiments  
619 available at <https://doi.org/10.7910/DVN/KJAMMP>

#### 620 621 **4.7 Data normalization**

622 In order to compare tasks on the same scale, we normalized data using min–max normalization  
623 to rescale values to a common range between 0 and 1 according to the formula  $x' = \frac{x - \min(x)}{\max(x) - \min(x)}$ , where  $x$  represents the original value and  $x'$  represents the normalized value.  
624 This approach was used to standardize behavioral measures across all non-conflict tasks (Food  
625 alone, Toy alone, and Light alone), which differed in their reward and cost parameters.  
626 Normalization enabled direct comparison across tasks by minimizing scale-dependent differences  
627 while preserving relative behavioral variation.  
628

### 629 630 **5 IMMUNOHISTOCHEMISTRY FOLLOWING GHSR-ACTIVATION**

#### 631 **5.1 Histological quality control**

632 Rats were randomly assigned to experimental groups, and both male and female rats were  
633 included in all experiments. Tissue collection and quantitative analysis were performed blinded to  
634 treatment whenever possible. All staining experiments were independently repeated at least three  
635 times to ensure reproducibility. Each experimental run included both control and treatment groups  
636 processed in parallel under identical conditions. For each region of interest (ROI), multiple  
637 sections were analyzed per animal, and representative images were selected only after  
638 confirming consistency across replicates. We ensured that all rats that were included in analysis  
639 had good perfusion and immunolabeling.

#### 640 **5.2 General tissue preparation, immunolabeling and microscopy**

641 Rats were deeply anesthetized with Isoflurane and transcardially perfused with 0.9% saline  
642 followed by 4% (w/v) paraformaldehyde in 0.01 M phosphate-buffered saline (PBS), pH 7.4.  
643 Brains were dissected, post-fixed overnight at 4°C, then transferred to a 30% (w/v) sucrose  
644 sinking solution overnight at 4°C. Coronal sections (30  $\mu$ m) were collected using a sliding  
645 microtome and stored in cryoprotectant solution (ethylene glycol and glycerol in 0.05 M phosphate  
646 buffer) at –20°C until further processing.

647 Briefly, all IHC experiments followed a standardized protocol below, for detailed IHC staining and  
648 imaging protocols: see section 5.5 Detailed immunohistochemical protocols. Free-floating  
649 sections were rinsed in Tris-buffered saline (TBS) (5 washes, 5 mins each) and blocked in 1x TBS  
650 containing 0.1% Triton X-100 and 4% normal donkey serum (NDS) for 2 hours at room  
651 temperature with gentle agitation. Unless otherwise specified, all wash steps consisted of five  
652 washes in TBS (5 min each). Sections were incubated with primary antibodies (table S2) diluted  
653 in blocking solution overnight at 4°C on a shaker. Following primary incubation, sections were  
654 rinsed in TBS and incubated with species-appropriate Alexa Fluor-conjugated secondary  
655 antibodies (table S2) diluted in blocking solution for 5 hours at room temperature. All antibodies  
656 were diluted in a carrier solution consisting of TBS, 0.1% Triton X-100, and with 4% NDS, and  
657 incubations with fluorescent antibodies were performed protected from light. Following secondary  
658 incubation, sections were rinsed with TBS and incubated with NeuroTrace Blue (NT) for somatic  
659 counterstaining (1:500 in TBS). Sectioned were then rinsed with TBS, mounted on to glass slides

660 (Fisher, 22-03448), and coverslipped using a glycerol-based antifade mounting medium with #1.5  
661 glass coverslips (VWR, 16004-312). Slides were imaged withing 48 hours of coverslipping.

662 Imaging was performed using a Zeiss LSM 900 confocal microscope (Carl Zeiss) in standard  
663 confocal mode (non-Airyscan). Diode lasers at 405, 488, 561, and 640 nm were used for excitation  
664 of fluorescent signals. Images were acquired using a 20x objective for most experiments (unless  
665 otherwise stated), and a 60x oil immersion objective (1.4 NA) for high-resolution imaging of GHSR  
666 labeling. Slides were first screened using a low-magnification preview scan (2.5x) to identify  
667 regions of interest (ROIs) for subsequent imaging. Optical sectioning parameters were optimized  
668 using Zeiss acquisition software. Laser power, gain, and offset settings were held constant across  
669 all sections within each staining experiment but were adjusted between experiments as needed  
670 based on fluorophore signal intensity. All images were acquired as single optical sections (no z-  
671 stacks). Tiled images were collected to capture entire regions of interest and exported as TIFF  
672 files without downsampling.

### 673 **5.3 Image processing and analysis**

674 All image processing and quantification were performed using ImageJ (Fiji). Background  
675 subtraction and linear contrast adjustments were applied uniformly across images for presentation  
676 purposes only and did not affect quantitative analyses. Raw image files were exported as TIFF  
677 images and analyzed in ImageJ using standardized processing workflows, described below.  
678 Figures were assembled using Adobe Illustrator.

#### 679 *5.3.1 NEUROANATOMICAL PARCELLATION USING NEUROTRACE*

680 Neuroanatomical regions were identified using NeuroTrace (NT) fluorescent Nissl staining, which  
681 provided visualization of neuron cell bodies and cytoarchitectural boundaries. For each section,  
682 NT labeling was used in conjunction with anatomical landmarks and Paxinos and Watson's *The*  
683 *Rat Brain in Stereotaxic Coordinates* atlas to identify regions of interest (ROIs). ROIs were  
684 manually delineated in ImageJ using the polygon selection tool. ROIs were then added to the  
685 ImageJ ROI Manager and applied to the corresponding protein of interest mask for subsequent  
686 quantification. For analyses involving striosomes, NT-based boundaries were supplemented with  
687  $\mu$ -opioid receptor (MOR) immunolabeling to distinguish striosome and matrix compartments. All  
688 ROI definitions were performed prior to quantitative analysis and were applied uniformly across  
689 experimental groups.

#### 690 *5.3.2 STRIATAL SUBDIVISION INTO 4 COMPARTMENTS*

691 For striatal analyses, the dorsal striatum was subdivided into 4 regions, dorsal medial (DMS),  
692 dorsal lateral (DLS), ventral dorsomedial (vDMS), and ventral dorsolateral (vDLS) compartments  
693 using a standardized geometric parcellation scheme based on anatomical landmarks <sup>3</sup> (**fig. S3E**).

694 The dorsal and ventral striatum (AcbC) were first delineated using a horizontal line (#1) drawn  
695 from the dorsal tip of the anterior commissure to the lateral boundary of the striatum. A diagonal  
696 line (#2) was then extended from the dorsal tip of the nucleus accumbens shell, intersecting line  
697 #1. To generate dorsoventral subdivisions, a second horizontal line (#3), was drawn across the  
698 dorsal extent of the striatum. A vertical line (#4) was drawn from the dorsal tip of the nucleus  
699 accumbens shell to intersect line #3. A diagonal line (#5), parallel to line #2, was drawn from the  
700 midpoint of line #4 to the lateral boundary of the striatum. To generate mediolateral subdivisions,  
701 a final diagonal line (#6) connecting the midpoints of lines #2 and #5 to the dorsal boundary of

702 the striatum was drawn. These boundaries separated the striatum into four regions: DMS, DLS,  
703 vDMS, and vDLS. The same parcellation scheme was applied to all sections and experimental  
704 groups, and resulting ROIs were stored in the ImageJ ROI Manager for subsequent analyses.

### 705 5.3.3 STRIOSOMES AND MATRIX SEGMENTATION USING MOR IMMUNOREACTIVITY

706 Striosomes were identified using MOR immunoreactivity and segmented using a standardized  
707 image-processing workflow in ImageJ (**fig. S3F-Q**). The MOR channel was converted to 8-bit  
708 grayscale and pre-processed to remove isolated overexposed pixels using the Remove Outliers  
709 function (radius=5 pixels). Background fluorescence was subtracted using a rolling-ball radius of  
710 50 pixels, and a Gaussian blur filter (radius=2-3 pixels) was applied to reduce image noise and  
711 improve compartment boundaries. Thresholding was then performed to isolate MOR-positive  
712 regions and generate binary masks. Unless otherwise noted, masks were generated using the  
713 Triangle auto-threshold algorithm. In sections exhibiting excessive signal intensity, threshold  
714 parameters were adjusted to capture the upper 1-3% of MOR signal while preserving anatomical  
715 compartment boundaries. Resulting binary masks were converted to ROIs and added to the  
716 ImageJ ROI Manager. MOR-defined ROIs were then intersected with striatal subdivisions  
717 generated as described in section 5.3.2 to create compartment-specific ROIs (e.g., MOR<sup>+</sup> DMS,  
718 MOR<sup>+</sup> DLS, MOR<sup>+</sup> vDMS, and MOR<sup>+</sup> vDLS). These ROIs were used for all subsequent striosomal  
719 analyses.

720 For quantification of proteins of interest, positive cells or puncta were identified using marker-  
721 specific processing pipelines described below. Total counts were obtained for each striatal  
722 subdivision, and striosomal counts were isolated using MOR-defined ROIs. Matrix values were  
723 calculated by subtracting striosomal counts from total counts within the corresponding striatal  
724 subdivision. Counts were normalized to the ROI area and reported as density measurements.

### 725 5.3.4 cFOS (MAKER FOR NEURONAL ACTIVITY) QUANTIFICATION

726  
727 cFos-positive nuclei were quantified using a standardized image-processing workflow in ImageJ.  
728 As illustrated in **fig. S3F-Q**, the cFos channel was converted to 8-bit grayscale. Images were  
729 despeckled to remove overexposed pixels, and background signal was subtracted using a rolling-  
730 ball radius of 50 pixels. A median filter (radius=2-3 pixels) was then applied to reduce image noise.  
731 Thresholding was performed using the upper 0.10% of pixel intensities to isolate cFos-positive  
732 nuclei and generate binary masks. Threshold parameters were held constant across all sections  
733 within a staining experiment. Watershed segmentation was used to separate clustered cells prior  
734 to automated quantification. Cell counts were obtained using the ImageJ Particle Analyzer with  
735 circularity constraints of 0.8-1.0 to identify individual nuclei. Quantification was performed within  
736 anatomically defined ROIs generated as described in section 5.3.1-5.3.3. Cell counts were  
737 normalized to the ROI area and reported as cFos-positive cells per mm<sup>2</sup>.  
738

### 739 5.3.5 PPDH (MAKER FOR NEURONAL INACTIVITY) QUANTIFICATION

740 Phosphorylated pyruvate dehydrogenase (pPDH) immunoreactivity was quantified as an inverse  
741 marker of cellular activity. Quantification was performed within the same anatomically defined  
742 ROIs used for cFos analyses. The pPDH channel was converted to 8-bit grayscale, processed  
743 using background subtraction (rolling-ball radius=50 pixels), and despeckled to reduce noise. No  
744 additional filtering was applied. Thresholding was performed using the upper 5% of pixel  
745 intensities to isolate pPDH-positive signal and generate binary masks.

746 Because pPDH labeling is not restricted to the nucleus, pPDH-positive cells were manually  
747 identified based on colocalization with NT-positive neurons to ensure cellular localization. Only  
748 pPDH signal overlapping with NT-labeled cell bodies was included in the analysis, thereby  
749 excluding non-cellular labeling or glial processes. Positive cells were quantified within each ROI  
750 and normalized to area. For striatal analyses, pPDH-positive cells were additionally separated  
751 into striosome and matrix compartments using MOR-defined ROIs as described in Section 5.3.3.  
752 In dopaminergic regions, including the substantia nigra pars compacta (daSNc), pPDH  
753 quantification was combined with tyrosine hydroxylase (TH) labeling to restrict analysis to  
754 dopaminergic neurons.

### 755 5.3.6 *TH QUANTIFICATION AND DOPAMINERGIC SNC SEGMENTATION*

757 The substantia nigra pars compacta (SNc) was first distinguished from the adjacent substantia  
758 nigra pars reticulata (SNr) using anatomical landmarks and NT-defined cytoarchitecture.  
759 Dopaminergic neurons of the SNc (daSNc) were identified based on tyrosine hydroxylase (TH)  
760 immunoreactivity. To generate daSNc ROIs, the TH channel was converted to 8-bit grayscale,  
761 processed using background subtraction (rolling-ball radius=50 pixels), and despeckled to reduce  
762 image noise. Thresholding was then applied to isolate TH-positive cell bodies and generate binary  
763 masks of dopaminergic neurons. TH-derived masks were spatially restricted to the anatomically  
764 defined SNc ROI, yielding a final ROI corresponding to the daSNc. These daSNc ROIs were used  
765 for all analyses of dopaminergic neuron activity. For cFos and pPDH analyses, only signal  
766 colocalized with TH-positive neurons within the daSNc ROI was included in quantification.

### 767 5.3.7 *GHSR QUANTIFICATION: LOCALIZATION OF THE GROWTH HORMONE SECRETAGOGUE* 768 *RECEPTOR*

769 GHSR expression was quantified within striosome and matrix compartments using MOR-defined  
770 ROIs generated as described in section 5.3.3. Images were converted to 8-bit grayscale and  
771 preprocessed using background subtraction and despeckling prior to threshold-based  
772 segmentation. Binary masks were generated using a fixed intensity threshold corresponding to  
773 the upper 0.1% of pixel intensities. GHSR-positive puncta were then identified using the ImageJ  
774 Particle Analyzer with size constraints of  $3.0 \times 10^{-8}$  to  $1.0 \times 10^{-5}$  mm<sup>2</sup> and circularity constraints of  
775 0.8-1.0 to exclude background fluorescence and non-specific artifacts. Puncta counts were  
776 normalized to ROI area and reported as puncta density (puncta/mm<sup>2</sup>). All image-processing  
777 parameters described were held constant within each GHSR staining experiment.

### 778 5.3.8 *BIOTINYLATED GHRELIN (BGHR) QUANTIFICATION*

779 Biotinylated ghrelin (BGHR) binding was quantified within striosome and matrix compartments  
780 using MOR-defined ROIs generated as described in section 5.3.3. Images were converted to 8-  
781 bit grayscale and preprocessed using background subtraction and despeckling prior to threshold-  
782 based segmentation. To isolate high-intensity ligand signal, a fixed threshold corresponding to  
783 the upper 0.1% of pixel intensities was applied uniformly across all images to generate binary  
784 masks of BGHR-positive puncta. BGHR-positive puncta were identified using the ImageJ Particle  
785 Analyzer with size constraints of  $5.0 \times 10^{-7}$  to  $9.0 \times 10^{-6}$  mm<sup>2</sup> and circularity constraints of 0.9-1.0  
786 to exclude background fluorescence and non-specific artifacts. Puncta counts were normalized  
787 to ROI area and reported as puncta density (puncta/mm<sup>2</sup>). All image-processing parameters

788 described were held constant within each BGHR staining experiment.  
789

### 790 5.3.9 IDENTIFICATION / SEGMENTATION OF DREADD VIRUS IN STRIATUM

791 For analyses restricted to DREADD-expressing neurons, viral reporter expression (HA, mCitrine,  
792 or RFP) was used to generate virus-positive ROIs. Reporter channels were converted to 8-bit  
793 grayscale, despeckled, and processed using the Remove Outliers function to eliminate isolated  
794 overexposed pixels. A Gaussian blur filter (radius=3-5 pixels) was applied to smooth signal  
795 boundaries prior to thresholding. Binary masks were generated using a fixed threshold  
796 corresponding to the upper 10% of pixel intensities, selected to capture the full extent of reporter  
797 expression while minimizing background fluorescence.

798 For striosomal analyses, virus-derived masks were combined with MOR-defined striosome masks  
799 to generate intersection ROIs corresponding to DREADD-expressing striosomal neurons  
800 (MOR+/virus+). These intersection ROIs were used for all subsequent analyses of DREADD-  
801 mediated effects.

## 802 5.4 Histological experimental design

### 803 5.4.1 EXP 5: WHOLE-BRAIN MAPPING OF IBU INDUCED ACTIVITY

804 To identify brain regions responsive to ghrelin receptor activation, cFos immunolabeling was  
805 quantified across approximately 50 anatomically defined regions of interest (ROIs) (**fig. S3A-R**;  
806 table S4). Adult rats (n=7-10 per group) received intraperitoneal (IP) injections of either SAL or  
807 IBU (1 mg/kg) and were perfused 3.5 hours following treatment.

808 Anatomically defined regions spanning cortical, striatal, thalamic, hypothalamic, and midbrain  
809 structures were quantified using NT-based parcellation as described in section 5.3.1. ROIs were  
810 selected within  $\pm 1$  mm of the designated bregma coordinate for each anatomical region (table  
811 S4). Images were acquired at 10x magnification (0.4 NA) using a Zeiss LSM 900 confocal  
812 microscope. Tissue processing and immunolabeling were performed using two parallel staining  
813 pipelines. For regions outside the striatum, sections were processed for cFos  
814 immunohistochemistry alone as described in section 5.5.2. For sections containing the striatum,  
815 MOR and cFos were co-labeled as described in section 5.5.3 to enable compartment-specific  
816 quantification of striosome and matrix activity.

817 To assess region-specific effects of IBU, cFos density was compared between SAL and IBU  
818 groups within each anatomical region using unpaired two-tailed t-tests. To facilitate cross-region  
819 comparisons, cFos densities were additionally normalized across ROIs using z-score  
820 transformation. Resulting z-score values for each region are reported in **fig. S3R**.

821 Raw image datasets, detailed image-processing workflows, and binary masks are publicly  
822 available at DOI: <https://doi.org/10.7910/DVN/DTXBD5>  
823 <https://doi.org/10.7910/DVN/EI60AH>  
824 <https://doi.org/10.7910/DVN/PYW4WW>  
825

## 826 5.4.2 EXP 6: DOSE-DEPENDENT EFFECTS OF IBU ON STRIATAL ACTIVITY

827 To assess compartment-specific dynamics of neuronal activation and inactivity within the striatum  
828 following GHSR activation, sections were co-labeled for cFos, pPDH, NT, and MOR (**Fig. 2A-C**;  
829 **fig. S3S-T**). Rats (n=6-8 per group) received IP injections of SAL or IBU (0.5x, 1x, 2x, or 10x) and  
830 were perfused 3.5 hours post-injection. For detailed staining and imaging protocols, see section  
831 5.5.4. Sections were imaged at 20x and exported as TIFF files: merged and individual. cFos and  
832 pPDH counts were obtained within striosome and matrix compartments for DMS and DLS (**fig.**  
833 **S14C-E**). cFos quantification was restricted to MOR+ regions as described in sections 5.3.3 to  
834 5.3.4 and pPDH quantification was restricted to NT-defined somas and MOR+ regions ROIs as  
835 described in section 5.3.5.

836

837 For cFos and pPDH analyses, a two-way ANOVA was used to assess the effects of treatment  
838 (SAL vs IBU) and compartment (striosome vs matrix), followed by Tukey's multiple-comparisons  
839 tests. Additional three-way ANOVAs were performed to evaluate the effects of region (DMS vs  
840 DLS), treatment (SAL vs IBU), and compartment (DMS vs DLS; **fig. S14H**).

841

842 Raw image datasets are publicly available at DOI: <https://doi.org/10.7910/DVN/KRAGMO>.  
843 Detailed image-processing workflows and binary masks used for quantitative analyses are  
844 available at DOI: <https://doi.org/10.7910/DVN/NEVZXF>.

845

## 846 5.4.3 EXP 7: DOSE-DEPENDENT EFFECTS OF IBU ON LHB, ARC, AND DASNC

847 To assess dose-dependent effects of IBU throughout the broader ghrelin-responsive circuit, cFos  
848 expression was quantified within the lateral habenula (LHb; **Fig. 3J-K**) and arcuate nucleus (ARC;  
849 **fig. S4G**), while cFos and pPDH expression were quantified within TH-positive neurons of daSNc  
850 (**Fig. L-M**). Rats (rats=5-8 per group) received SAL, 0.5x, 1x, 2x, or 10x IBU and were perfused  
851 3.5 h following treatment. Tissue was processed using region-specific staining protocols as  
852 described in sections 5.3. cFos quantification was restricted to NT-defined LHb and ARC ROIs.  
853 daSNc ROIs generated as described in section 5.3.6 was used for cFos and pPDH quantitation.

854

855 For all analyses, treatment groups were compared using one-way ANOVA followed by Tukey's  
856 multiple-comparisons tests.

857

858 Raw image datasets are publicly available:

859 LHb DOI: <https://doi.org/10.7910/DVN/D5BCOY>)

860 ARC DOI: <https://doi.org/10.7910/DVN/WANMCY>)

861 daSNc DOI: <https://doi.org/10.7910/DVN/AVMV9E>)

862

863 All Image-processing workflows and binary masks are available at DOI:  
864 <https://doi.org/10.7910/DVN/JWSLB>

865

## 866 5.4.4 EXP 8: GHSR EXPRESSION AND BIOTINYLATED GHRELIN (BGHR) BINDING WITHIN STRIATUM

867 To determine whether ghrelin signaling is preferentially associated with striosomes, two  
868 complementary approaches were used to assess receptor localization and ligand binding within  
869 striatal compartments.

870 First, GHSR expression was evaluated in saline-treated rats (n=7). Rats received SAL injections  
871 IP and were perfused 3.5 h later. Sections were co-labeled for GHSR and MOR (**Fig. 2D-F**; see  
872 section 5.5.5 for detailed staining protocols), imaged at 63x magnification, and GHSR puncta  
873 density was quantified within MOR-defined striosome and matrix compartments as described  
874 above (striosomes: sections 5.3.2-5.3.3; GHSR: 5.3.7). Comparisons between compartments  
875 were performed using paired two-tailed t-tests.

876  
877 To validate receptor localization, additional sections were labeled for GHSR, MOR, and  
878 biotinylated ghrelin (BGHR) to assess the spatial relationship between receptor expression and  
879 ligand binding within striosome and matrix compartments (**Fig. 2G**; see section 5.5.6 for staining  
880 procedures).

881  
882 Finally, BGHR binding was quantified across the IBU dose-response cohort (SAL, 0.5x, 1x, 2x,  
883 and 10x IBU; n=6–8/group) to determine whether prior IBU exposure altered ligand binding and  
884 receptor availability (**Fig. 2H**; **fig. S3W**; see section 5.5.4 for detailed staining protocols). BGHR  
885 puncta density was quantified within MOR-defined striosome and matrix compartments as  
886 described above (striosomes: sections 5.3.2-5.3.3; BGHR: 5.3.8). Statistical comparisons were  
887 performed using two-way ANOVA to assess the effects of treatment and striatal compartment,  
888 followed by Tukey's multiple-comparisons tests.

889

890 Raw image datasets are publicly available:

891 GHSR DOI: <https://doi.org/10.7910/DVN/UHTDDW>

892 bGHR DOI: <https://doi.org/10.7910/DVN/KRAGMO>

893

894 All Image-processing workflows and binary masks are available at  
895 DOI: <https://doi.org/10.7910/DVN/SNSRF4>.

896

## 897 5.4.5 EXP 9: DREADD MANIPULATIONS

898 To determine whether IBU-induced changes in neural activity and behavior depend on striosomal  
899 activity, Oprm1-Cre rats received Cre-dependent inhibitory hM4D(Gi) or excitatory hM3D(Gq)  
900 DREADD targeting striosomal neurons. Oprm1-Cre and Wild-type rats underwent stereotaxic viral  
901 injections as described in section 2.3. Following a 4-week recovery period, rats underwent  
902 behavioral testing for 4-6 months as described in section 4. The same cohort was subsequently  
903 used for immunohistochemical analyses. A schematic of the experimental timeline is shown in  
904 **Fig. 4A**.

905

906 For IHC analysis, Wild-type cohorts received SAL alone, IBU alone, or CNO+SAL treatment. Rats  
907 expressing inhibitory DREADD received either CNO+SAL (Inh SAL) or CNO+IBU (Inh IBU),  
908 whereas rats expressing excitatory DREADD received either CNO+SAL (Exc SAL) or CNO+IBU  
909 (Exc IBU). An additional inhibitory cohort received IBU in the absence of CNO (Cre+IBU) to control

910 for viral expression and ensure comparable experimental handling across groups. Detailed group  
 911 assignments are shown in **Fig. 4B**. On day of testing, rats (rats=6-8/group) received an initial  
 912 CNO injection concurrent with SAL or IBU administration, followed by a second CNO injection 1.5  
 913 h later to maintain receptor activation throughout the experimental window. Rats were perfused  
 914 3.5 h following the initial injection.

915  
 916 First, to validate selective targeting of striosomal neurons, the Cre + IBU (no CNO) cohort was  
 917 used exclusively to assess viral targeting specificity. Sections were labeled for MOR and viral  
 918 reporters (HA and mCitrine). Virus-positive cells were quantified within MOR-defined striosome  
 919 and matrix compartments as described in Sections 5.5.5, and targeting specificity was assessed  
 920 by comparing the proportion of virus-positive cells localized to each compartment using paired  
 921 two-tailed t-tests (**Fig. 3A-B**; see section 5.5.10-5.5.11 for detailed staining protocols).

922  
 923 Second, determine how striosomal activity influences neuronal activation, cFos and pPDH  
 924 expression were quantified following inhibitory and excitatory DREADD-mediated manipulation of  
 925 striosomal neurons (**Fig. 4C**; **fig. S6**; **fig. S8A-D**). Brains were processed for MOR, cFos, pPDH,  
 926 and viral reporter expression as described above. To restrict analyses to DREADD-expressing  
 927 striosomal neurons, MOR-defined striosome masks were combined with virus-derived masks (HA  
 928 or RFP), generating intersection ROIs corresponding to MOR+/virus+ cells. cFos and pPDH  
 929 expression were quantified within these ROIs using the methods described in sections 5.3.  
 930 Statistical comparisons among experimental groups were performed using one-way ANOVA  
 931 followed by Tukey's multiple-comparisons tests.

932  
 933 Lastly, to determine whether striosomal manipulation altered activity within downstream circuit  
 934 regions, cFos expression was quantified in the LHb, while cFos and pPDH expression were  
 935 quantified in TH-positive neurons of the daSNc using tissue from the experimental groups  
 936 described above (**Fig. 4D-I**). Quantification was performed using the methods described in  
 937 Sections 5.3.4-6. Statistical comparisons among experimental groups were conducted using one-  
 938 way ANOVA followed by Tukey's multiple-comparisons tests.

939 Raw image datasets are publicly available:  
 940 Striatum DOI: <https://doi.org/10.7910/DVN/WHLWVB>)  
 941 LHb DOI: <https://doi.org/10.7910/DVN/CT9ATL>)  
 942 daSNc DOI: <https://doi.org/10.7910/DVN/O5GNIF>)

943  
 944 All Image-processing workflows and binary masks are available at  
 945 DOI: <https://doi.org/10.7910/DVN/QLVA4X>

946

## 947 **5.5 Detailed immunohistochemical protocols**

### 948 **5.5.1 PERFUSION**

- 949  
 950  
 951  
 952  
 953  
 954  
 955  
 956
1. Deeply anesthetize rats with isoflurane.
  2. Transcardially perfuse with 0.9% saline, followed by 4% paraformaldehyde (PFA) in PBS.
  3. Extract brains and post-fix overnight in 4% PFA at 4 °C.
  4. Transfer brains to 30% sucrose in PBS for ~48 hours (or until fully sunk).
  5. Section coronally at 30 µm on a sliding microtome.
  6. Store sections in cryoprotectant (25% (v/v) ethylene glycol and 25% (v/v) glycerol in 0.05 M phosphate buffer (0.2M Sodium Phosphate Buffer Monobasic + 0.2M Sodium phosphate buffer dibasic) at -20 °C until staining.

957

958 5.5.2 *cFOS IMMUNOHISTOCHEMISTRY ACROSS 50 BRAIN REGIONS (EXCLUDING STRIATUM)*

959

960 Experimental procedure for cFos analysis

- 961 1. Inject rats with 1 mg/kg lbutamoren (IBU; 1x dose) via IP injection.
- 962 2. Return rats to their home cage with ad libitum access to food and water.
- 963 3. Allow rats to remain undisturbed for 3.5 hours post-injection.
- 964 4. Following the 3.5-hour incubation period, perform transcardial perfusion as described in
- 965 Section 5.5.1.
- 966 5. Section brains coronally (30  $\mu$ m) and store tissue in cryoprotectant at  $-20^{\circ}\text{C}$  until
- 967 processing.

968 Section retrieval and washes (5 x 5 min)

- 969 1. Remove free-floating sections from cryoprotectant and transfer into 1x Tris-buffered saline
- 970 (TBS).
- 971 2. Select sections corresponding to target anatomical regions within  $\pm 0.5$  mm of the following
- 972 bregma coordinates:
- 973
  - o Prefrontal cortex: +3.24 mm
  - o Rostral thalamus and GPe/GPi:  $-1.56$  mm
  - o Thalamus:  $-3.24$
  - o Hypothalamus:  $-3.0$  mm
  - o Amygdala:  $-3.0$  mm
  - o Midbrain regions:  $-5.16$  mm
- 974
- 975
- 976
- 977
- 978
- 979 3. Wash sections 5 times for 5 minutes each in fresh 1x TBS with gentle agitation.

980 Blocking (2 hours, room temperature)

- 981 1. Prepare blocking solution with the following:
- 982
  - o 1x TBS
  - o 0.1% Triton X-100
  - o 4% normal donkey serum (NDS)
- 983
- 984
- 985 2. Incubate sections in blocking solution for 2 hours at room temperature.
- 986 3. Maintain gentle agitation throughout incubation.

987 cFos Primary antibody incubation (48 hours,  $4^{\circ}\text{C}$ )

- 988 1. Prepare primary antibody solution by diluting mouse anti-cFos (1:2000; Santa Cruz, sc-
- 989 272343) in same blocking solution prepared above.
- 990 2. Incubate sections in primary antibody solution for 48 hours at  $4^{\circ}\text{C}$ , maintaining gentle
- 991 agitation on an orbital shaker.
- 992 3. Ensure sections are fully submerged and evenly spaced.
- 993 4. Following primary incubation, wash sections 5 x 5 in fresh TBS

994 Secondary antibody incubation (5 hours, room temperature)

- 995 1. Prepare secondary antibody solution by diluting donkey anti-mouse Alexa Fluor647  
 996 (1:1000; Jackson ImmunoResearch, 715-605-151) in the same blocking solution prepared  
 997 above.  
 998 2. Incubate sections for 5 hours at room temperature, maintaining gentle agitation on an  
 999 orbital shaker.  
 1000 3. Following secondary incubation, wash sections 5 times in fresh TBS, for 5 mins

1001 Nissl counterstaining (NT Blue)

- 1002 1. Incubate sections in NT (1:500 in TBS) for 10 minutes at room temperature.  
 1003 2. Maintain gentle agitation on the orbital shaker and protect from light.  
 1004 3. Wash sections 5 x 5 minutes in fresh 1x TBS.

1005 Mounting and storage

- 1006 1. Mount sections onto glass slides  
 1007 2. Allow excess buffer to drain without drying tissue.  
 1008 3. Coverslip using glycerol-based antifade mounting medium and #1.5 glass coverslips.  
 1009 4. Store slides at 4°C protected from light.  
 1010 5. Image slides within 48 hours of coverslipping.

1011 cFos Imaging across 50 brain regions

- 1012 1. Perform imaging using a Zeiss LSM 900 confocal microscope.  
 1013 2. Acquire tiled images at 10x magnification (0.4 NA) to capture full regions of interest.  
 1014 3. Use 4x line averaging to improve signal-to-noise ratio.  
 1015 4. Perform an initial low-magnification preview scan to identify regions of interest prior to  
 1016 acquisition.  
 1017 5. Acquire tiled images covering the full region of interest and fuse tiles using microscope  
 1018 software to remove stitching artifacts.  
 1019 6. Export final images as TIFF files without downsampling.  
 1020 7. Image processing and analysis described in section 5.3.

1021 5.5.3 *cFOS IHC IN STRIOSOME AND MATRIX COMPARTMENTS*

1022 Experimental procedure for cFos analysis in striatum

- 1023 1. Inject rats with either saline or 1x IBU (1 mg/kg) via IP injection (n = 10-12 rats per  
 1024 condition).  
 1025 2. Return rats to their home cage with ad libitum access to food and water.  
 1026 3. Allow rats to remain undisturbed for 3.5 hours post-injection.  
 1027 4. Following the 3.5-hour incubation period, perform transcatheter perfusion as described in  
 1028 Section 5.5.1.  
 1029 5. Section brains coronally (30  $\mu$ m) and store tissue in cryoprotectant at -20°C until  
 1030 processing.

1031 Striatum section selection and washes

- 1032 1. Remove free-floating sections from cryoprotectant and transfer into 1x TBS

- 1033 2. Select sections corresponding to anterior dorsal striatum within  $\pm 0.5$  mm of bregma +1.8  
 1034 mm.  
 1035 3. Wash sections 5 times for 5 minutes each in fresh 1x TBS with gentle agitation.

1036 Blocking (2 hours, room temperature)

- 1037 1. Prepare blocking solution with the following:  
 1038 • 1x TBS  
 1039 • 0.1% Triton X-100  
 1040 • 4% normal donkey serum (NDS)  
 1041 2. Incubate sections in blocking solution for 2 hours at room temperature.  
 1042 3. Maintain gentle agitation throughout incubation.

1043 cFos and MOR primary antibody incubation (48 hours, 4°C)

- 1044  
 1045 1. Mix primary antibodies in blocking solution prepared above  
 1046 ○ mouse anti-cFos (1:2000; Santa Cruz, sc-272343) and  
 1047 ○ rabbit anti- $\mu$ -opioid receptor (MOR) (1:5000; ImmunoStar, 24216)  
 1048 2. Incubate sections in primary antibody solution for 48 hours at 4°C, maintaining gentle  
 1049 agitation on an orbital shaker.  
 1050 3. Following primary incubation, wash sections 5 x 5 in fresh TBS

1051 Secondary antibody incubation (5 hours, room temperature)

- 1052 1. Mix secondaries antibodies in blocking solution  
 1053 ○ cFos: donkey anti-mouse Alexa Fluor 647 (1:1000; Jackson ImmunoResearch,  
 1054 715-605-151)  
 1055 ○ MOR: donkey anti-rabbit Alexa Fluor 555 (1:1000; Jackson ImmunoResearch,  
 1056 711-565-152)  
 1057 2. Incubate sections for 5 hours at room temperature, maintaining gentle agitation on orbital  
 1058 shaker.  
 1059 3. Following secondary incubation, wash sections 5 times in fresh TBS, for 5 mins

1060 Mounting and storage

- 1061 4. Mount sections onto glass slides.  
 1062 5. Allow excess buffer to drain without drying tissue.  
 1063 6. Coverslip using glycerol-based antifade mounting medium and #1.5 glass coverslips.  
 1064 7. Store slides at 4°C protected from light.  
 1065 8. Image slides within 2 weeks of cover slipping.

1066 cFos / MOR Imaging in striatum

- 1067 1. Perform imaging using a Zeiss LSM 900 confocal microscope.  
 1068 2. Acquire tiled images at 10x magnification to capture the full striatal region of interest.  
 1069 3. Use a sampling rate of 1.0 and 4x line averaging to improve signal-to-noise ratio.  
 1070 4. Perform an initial low-magnification preview scan to identify the region of interest prior to  
 1071 acquisition.  
 1072 5. Acquire tiled images covering the full striatal region and fuse tiles using microscope  
 1073 software to remove stitching artifacts.

- 1074 6. Apply minimal and uniform background adjustment across images to improve signal-to-  
 1075 noise ratio  
 1076 7. Export final images as TIFF files without downsampling.  
 1077 8. Image processing and analysis described in section 5.3.  
 1078 9. Multiplex IHC in striatum for cFos, pPDH, MOR, and biotinylated-ghrelin analysis

1079 5.5.4 *cFos, PPDH, BGHR, MOR IN STRIATUM*

1080

1081 Experimental procedure for cFos analysis

- 1082 1. Inject rats with either saline or IBU at 0.5x, 1x, 2x, or 10x doses IP injection (n = 6–8 rats  
 1083 per group).  
 1084 2. Return rats to their home cage with ad libitum access to food and water.  
 1085 3. Allow rats to remain undisturbed for 3.5 hours post-injection.  
 1086 4. Following the 3.5-hour incubation period, perform transcordial perfusion as described in  
 1087 Section 5.5.1.  
 1088 5. Section brains coronally (30  $\mu$ m) and store tissue in cryoprotectant at  $-20^{\circ}\text{C}$  until  
 1089 processing.

1090 Striatum section selection and washes (5 x 5 min)

- 1091 1. Remove free-floating sections from cryoprotectant and transfer into 1x TBS  
 1092 2. Select sections corresponding to anterior dorsal striatum within  $\pm 0.5$  mm of bregma +1.8  
 1093 mm.  
 1094 3. Wash sections 5 times for 5 minutes each in fresh 1x TBS with gentle agitation.

1095 Endogenous biotin blocking kit (Thermo #E21390)

- 1096 1. Incubate sections in reagent A solution (Thermo Fisher Endogenous Biotin Blocking Kit,  
 1097 #E21390) for 15-30 minutes at room temperature  
 1098 2. Wash sections 3 x 5 minutes in 1x TBS  
 1099 3. Incubate sections in reagent B solution for 15-30 minutes at room temperature.  
 1100 4. Wash sections 3 x 5 minutes in 1x TBS  
 1101 5. Maintain gentle agitation throughout all incubations

1102 Blocking (2 hours, room temperature)

- 1103 1. Prepare blocking solution with the following:  
 1104 • 1x TBS  
 1105 • 0.1% Triton X-100  
 1106 • 4% normal donkey serum (NDS)  
 1107 2. Incubate sections in blocking solution for 2 hours at room temperature.  
 1108 3. Maintain gentle agitation throughout incubation.

1109 Primary antibody + ligand incubation (48 hours,  $4^{\circ}\text{C}$ )

- 1110 1. Mix primary antibodies in blocking solution prepared above  
 1111 ○ mouse anti-cFos (1:2000; Santa Cruz, sc-272343)  
 1112 ○ Rabbit anti-pPDH (1:1000; Cell Signaling Technology #E4V9L)  
 1113 ○ Guinea pig anti-MOR (1:1000; Millipore Sigma AB5509)

- 1114           ○ Biotinylated-ghrelin (AnaSpec AS-29391; 1:500)
- 1115           2. Incubate sections in primary antibody solution for 48 hours at 4°C, maintaining gentle
- 1116           agitation on an orbital shaker.
- 1117           3. Following primary incubation, wash sections 5 x 5 in fresh TBS
- 1118   Secondary antibody incubation (5 hours, room temperature)
- 1119           1. Mix secondaries antibodies in blocking solution
- 1120           ○ cFos: donkey anti-mouse Alexa Fluor 555 (1:1000; Jackson ImmunoResearch)
- 1121           ○ pPDH: donkey anti-rabbit Alexa Fluor 647 (1:1000; Jackson ImmunoResearch)
- 1122           ○ MOR: Donkey anti-guinea pig Alexa Fluor 488 (1:1000; Jackson)
- 1123           ○ Streptavidin Alexa Fluor 594 (1:1000; Jackson ImmunoResearch)
- 1124           2. Incubate sections for 5 hours at room temperature, maintaining gentle agitation on orbital
- 1125           shaker.
- 1126           3. Following secondary incubation, wash sections 5 times in fresh TBS, for 5 mins
- 1127   Nissl counterstaining
- 1128           1. Incubate sections in NT (1:500 in TBS) for 10 minutes at room temperature.
- 1129           2. Maintain gentle agitation and protect from light during incubation.
- 1130           3. wash sections 5 times in fresh TBS, for 5 mins
- 1131   Mounting and storage
- 1132           1. Mount sections onto glass slides.
- 1133           2. Allow excess buffer to drain without drying tissue.
- 1134           3. Coverslip using glycerol-based antifade mounting medium and #1.5 glass coverslips.
- 1135           4. Store slides at 4°C protected from light.
- 1136           5. Image slides within 48 hours of coverslipping.
- 1137   cFos, pPDH, MOR, and Biotin-ghrelin imaging in striatum
- 1138           1. Perform imaging using a Zeiss LSM 900 confocal microscope.
- 1139           2. Acquire tiled images at 20x magnification to capture the full striatal region of interest.
- 1140           3. Use a sampling rate of 0.4 sampling and 4x line averaging to improve signal-to-noise ratio.
- 1141           4. Perform an initial low-magnification preview scan to identify the region of interest prior to
- 1142           acquisition.
- 1143           5. Acquire tiled images covering the full striatal region and fuse tiles using microscope
- 1144           software to remove stitching artifacts.
- 1145           6. Apply minimal and uniform background adjustment across images to improve signal-to-
- 1146           noise ratio
- 1147           7. Export final images as TIFF files without downsampling.
- 1148           8. Image processing and analysis described in section 5.3.
- 1149   5.5.5 *IHC FOR GHSR EXPRESSION IN STRIATAL COMPARTMENTS*
- 1150   Experimental procedure
- 1151           1. Inject rats with saline via IP injection (n = 7 rats).
- 1152           2. Return rats to their home cage with ad libitum access to food and water.
- 1153           3. Allow rats to remain undisturbed for 3.5 hours post-injection.
- 1154           4. Following the 3.5-hour incubation period, perform transcordial perfusion as described in
- 1155           Section 5.5.1.

1156 5. Section brains coronally (30  $\mu\text{m}$ ) and store tissue in cryoprotectant at  $-20^{\circ}\text{C}$  until  
1157 processing.

1158 Striatum section selection and washes

- 1159 1. Remove free-floating sections from cryoprotectant and transfer into 1x TBS
- 1160 2. Select sections corresponding to anterior dorsal striatum within  $\pm 0.5$  mm of bregma +1.8
- 1161 mm.
- 1162 3. Wash sections 5 times for 5 minutes each in fresh 1x TBS with gentle agitation.

1163 Blocking (2 hours, room temperature)

- 1164 1. Prepare blocking solution with the following:
  - 1165 • 1x TBS
  - 1166 • 0.1% Triton X-100
  - 1167 • 4% normal donkey serum (NDS)
- 1168 2. Incubate sections in blocking solution for 2 hours at room temperature.
- 1169 3. Maintain gentle agitation throughout incubation.

1170 Primary antibody + ligand incubation (48 hours,  $4^{\circ}\text{C}$ )

- 1171 1. Mix primary antibodies in blocking solution prepared above
  - 1172 o Rabbit anti-GHSR (1:1000; Alomone Labs, # AGR-031)
  - 1173 o Guinea pig anti-MOR (1:1000; Millipore Sigma AB5509)
- 1174 2. Incubate sections in primary antibody solution for 48 hours at  $4^{\circ}\text{C}$ , maintaining gentle
- 1175 agitation on an orbital shaker.
- 1176 3. Following primary incubation, wash sections 5 x 5 in fresh TBS

1177 Secondary antibody incubation (5 hours, room temperature)

- 1178 1. Mix secondaries antibodies in blocking solution
  - 1179 o GHSR: donkey anti-rabbit Alexa Fluor 647 (1:1000; Jackson ImmunoResearch)
  - 1180 o MOR: Donkey anti-guinea pig Alexa Fluor 555 (1:1000; Jackson)
- 1181 2. Incubate sections for 5 hours at room temperature, maintaining gentle agitation on orbital
- 1182 shaker.
- 1183 3. Following secondary incubation, wash sections 5 times in fresh TBS, for 5 mins

1184 Nissl counterstaining

- 1185 1. Incubate sections in NT (1:500 in TBS) for 10 minutes at room temperature.
- 1186 2. Maintain gentle agitation and protect from light during incubation.
- 1187 3. wash sections 5 times in fresh TBS, for 5 mins

1188 Mounting and storage

- 1189 1. Mount sections onto glass slides.
- 1190 2. Allow excess buffer to drain without drying tissue.
- 1191 3. Coverslip using glycerol-based antifade mounting medium and #1.5 glass coverslips.
- 1192 4. Store slides at  $4^{\circ}\text{C}$  protected from light.
- 1193 5. Image slides within 48 hours of coverslipping.

1194 GHSR and MOR imaging in striatum

- 1195 1. Perform imaging using a Zeiss LSM 900.  
 1196 2. Perform an initial 2.5x preview scan, followed by 10x imaging to identify striosomal regions  
 1197 using the MOR (A555) channel.  
 1198 3. Following region identification, remove the slide, apply immersion oil, and reload the slide  
 1199 for high-magnification imaging.  
 1200 4. Acquire tiled images at 63x magnification (oil immersion, 1.4 NA) with a sampling rate of  
 1201 0.6 and 4x line averaging to capture high-resolution images of GHSR expression within  
 1202 striosomes.  
 1203 5. Acquire tiled images of the dorsal striatum in 16-bit format, and fuse tiles using microscope  
 1204 software to remove stitching artifacts.  
 1205 6. Export final images as BigTIFF files with 80% downsampling.  
 1206 7. Image processing and analysis described in section 5.3.

1207 **5.5.6 GHSR AND BIOTINYLATED-GHRELIN LOCALIZATION IN STRIOSOMES**

1208 **Experimental procedure**

- 1209 1. Inject rats with saline via IP injection (n = 6 rats).  
 1210 2. Return rats to their home cage with ad libitum access to food and water.  
 1211 3. Allow rats to remain undisturbed for 3.5 hours post-injection.  
 1212 4. Following the 3.5-hour incubation period, perform transcordial perfusion as described in  
 1213 Section 5.5.1.  
 1214 5. Section brains coronally (30  $\mu$ m) and store tissue in cryoprotectant at  $-20^{\circ}\text{C}$  until  
 1215 processing.

1216 **Striatum section selection and washes**

- 1217 1. Remove free-floating sections from cryoprotectant and transfer into 1x TBS  
 1218 2. Select sections corresponding to anterior dorsal striatum within  $\pm 0.5$  mm of bregma +1.8  
 1219 mm.  
 1220 3. Wash sections 5 times for 5 minutes each in fresh 1x TBS with gentle agitation.

1221 **Endogenous biotin blocking kit (Thermo #E21390)**

- 1222 1. Incubate sections in reagent A solution (Thermo Fisher Endogenous Biotin Blocking Kit,  
 1223 #E21390) for 15-30 minutes at room temperature  
 1224 2. Wash sections 3 x 5 minutes in 1x TBS  
 1225 3. Incubate sections in reagent B solution for 15-30 minutes at room temperature  
 1226 4. Wash sections 3 x 5 minutes in 1x TBS  
 1227 5. Maintain gentle agitation throughout all incubations

1228 **Blocking (2 hours, room temperature)**

- 1229 1. Prepare blocking solution with the following:  
 1230 • 1x TBS  
 1231 • 0.1% Triton X-100  
 1232 • 4% normal donkey serum (NDS)  
 1233 2. Incubate sections in blocking solution for 2 hours at room temperature.  
 1234 3. Maintain gentle agitation throughout incubation.

1235 **Primary antibody incubation (48 hours,  $4^{\circ}\text{C}$ )**

- 1236 1. Mix primary antibodies in blocking solution prepared above

- 1237           ○ Rabbit anti-GHSR (1:1000; Alomone Labs, # AGR-031)  
 1238           ○ Guinea pig anti-MOR (1:1000; Millipore Sigma AB5509)  
 1239           ○ Biotinylated-ghrelin (AnaSpec AS-29391; 1:500)  
 1240           2. Incubate sections in primary antibody solution for 48 hours at 4°C, maintaining gentle  
 1241           agitation on an orbital shaker.  
 1242           3. Following primary incubation, wash sections 5 x 5 in fresh TBS
- 1243   Secondary antibody incubation (5 hours, room temperature)
- 1244           1. Mix secondaries antibodies in blocking solution  
 1245           ○ GHSR: donkey anti-rabbit Alexa Fluor 647 (1:1000; Jackson ImmunoResearch)  
 1246           ○ MOR: Donkey anti-guinea pig Alexa Fluor 555 (1:1000; Jackson)  
 1247           ○ Streptavidin Alexa Fluor 594 (1:1000; Jackson ImmunoResearch)  
 1248           1. Incubate sections for 5 hours at room temperature, maintaining gentle agitation on orbital  
 1249           shaker.  
 1250           2. Following secondary incubation, wash sections 5 times in fresh TBS, for 5 mins
- 1251   Nissl counterstaining
- 1252           1. Incubate sections in NT (1:500 in TBS) for 10 minutes at room temperature.  
 1253           2. Maintain gentle agitation and protect from light during incubation.  
 1254           3. wash sections 5 times in fresh TBS, for 5 mins
- 1255   Mounting and storage
- 1256           1. Mount sections onto glass slides.  
 1257           2. Allow excess buffer to drain without drying tissue.  
 1258           3. Coverslip using glycerol-based antifade mounting medium and #1.5 glass coverslips.  
 1259           4. Store slides at 4°C protected from light.  
 1260           5. Image slides within 48 hours of coverslipping.
- 1261   GHSR, MOR, and biotin-ghrelin imaging in striatum
- 1262           1. Perform imaging using a Zeiss LSM 900 confocal microscope.  
 1263           2. Acquire tiled images at 20x magnification to capture the full striatal region of interest.  
 1264           3. Use a sampling rate of 0.4 sampling and 4x line averaging to improve signal-to-noise ratio.  
 1265           4. Perform an initial low-magnification preview scan to identify the region of interest prior to  
 1266           acquisition.  
 1267           5. Acquire tiled images covering the full striatal region and fuse tiles using microscope  
 1268           software to remove stitching artifacts.  
 1269           6. Apply minimal and uniform background adjustment across images to improve signal-to-  
 1270           noise ratio  
 1271           7. Export final images as TIFF files without downsampling.  
 1272           8. Image processing and analysis described in section 5.3.
- 1273   5.5.7 *cFOS* IN LHB, ARC  
 1274   Experimental procedure
- 1275           1. Inject rats with either saline or IBU at 0.5x, 1x, 2x, or 10x doses IP injection (n = 6–8 rats  
 1276           per group).  
 1277           2. Return rats to their home cage with ad libitum access to food and water.  
 1278           3. Allow rats to remain undisturbed for 3.5 hours post-injection.

- 1279 4. Following the 3.5-hour incubation period, perform transcardial perfusion as described in  
1280 Section 5.5.1.  
1281 5. Section brains coronally (30  $\mu$ m) and store tissue in cryoprotectant at  $-20^{\circ}\text{C}$  until  
1282 processing.

1283 Section selection and washes (5 x 5 min)

- 1284 1. Remove free-floating sections from cryoprotectant and transfer into 1x TBS saline (TBS).  
1285 2. Select sections corresponding to the lateral habenula (LHb) and arcuate nucleus (ARC)  
1286 around 1mm from bregma -3.0mm coordinate.  
1287 3. Wash sections 5 times for 5 minutes each in fresh 1x TBS with gentle agitation.

1288 Blocking (2 hours, room temperature)

- 1289 1. Prepare blocking solution with the following:  
1290
  - 1x TBS
  - 0.1% Triton X-100
  - 4% normal donkey serum (NDS)  
1293 2. Incubate sections in blocking solution for 2 hours at room temperature.  
1294 3. Maintain gentle agitation throughout incubation.

1295 cFos Primary antibody incubation (48 hours,  $4^{\circ}\text{C}$ )

- 1296 1. Mix primary antibodies in blocking solution prepared above  
1297
  - mouse anti-cFos (1:2000; Santa Cruz, sc-272343)  
1298 2. Incubate sections in primary antibody solution for 48 hours at  $4^{\circ}\text{C}$ , maintaining gentle  
1299 agitation on an orbital shaker.  
1300 3. Following primary incubation, wash sections 5 x 5 in fresh TBS

1301 Secondary antibody incubation (5 hours, room temperature)

- 1302 1. Mix secondaries antibodies in blocking solution  
1303
  - cFos: donkey anti-mouse Alexa Fluor 647 (1:1000; Jackson ImmunoResearch)  
1304 1. Incubate sections for 5 hours at room temperature, maintaining gentle agitation on orbital  
1305 shaker.  
1306 2. Following secondary incubation, wash sections 5 times in fresh TBS, for 5 mins

1307 Striatum section selection and washes

1308

1309 Nissl counterstaining

- 1310 1. Incubate sections in NT (1:500 in TBS) for 10 minutes at room temperature.  
1311 2. Maintain gentle agitation and protect from light during incubation.  
1312 3. wash sections 5 times in fresh TBS, for 5 mins

1313 Mounting and storage

- 1314 1. Mount sections onto glass slides.  
1315 2. Allow excess buffer to drain without drying tissue.  
1316 3. Coverslip using glycerol-based antifade mounting medium and #1.5 glass coverslips.  
1317 4. Store slides at  $4^{\circ}\text{C}$  protected from light.  
1318 5. Image slides within 48 hours of coverslipping.

## 1319 cFos Imaging

- 1320 1. Perform imaging using a Zeiss LSM 900 confocal microscope.
- 1321 2. Acquire tiled images at **20x magnification** to capture the full LHb and ARC region of
- 1322 interest.
- 1323 3. Use 4x line averaging to improve signal-to-noise ratio.
- 1324 4. Acquire tiled images and fuse tiles using microscope software to remove stitching artifacts.
- 1325 5. Export final images as TIFF files without downsampling.
- 1326 6. Image processing and analysis described in section 5.3.

## 1327 5.5.8 IHC OF CFOS AND PPDH IN DOPAMINERGIC NEURONS OF SNC

## 1328 Experimental procedure

- 1329 1. Inject rats with either saline or IBU at 0.5x, 1x, 2x, or 10x doses IP injection (n = 6-8 rats
- 1330 per group).
- 1331 2. Return rats to their home cage with ad libitum access to food and water.
- 1332 3. Allow rats to remain undisturbed for 3.5 hours post-injection.
- 1333 4. Following the 3.5-hour incubation period, perform transcardial perfusion as described in
- 1334 Section 5.5.1.
- 1335 5. Section brains coronally (30  $\mu$ m) and store tissue in cryoprotectant at  $-20^{\circ}\text{C}$  until
- 1336 processing.

## 1337 SNc section selection and washes

- 1338 1. Remove free-floating sections from cryoprotectant and transfer into 1x Tris-buffered saline
- 1339 (TBS).
- 1340 2. Select sections corresponding to the dopaminergic substantia nigra pars compacta
- 1341 (daSNc) within  $\pm 0.5$  mm of bregma  $-5.16$  mm.
- 1342 3. Wash sections 5 times for 5 minutes each in fresh 1x TBS with gentle agitation.

## 1343 Blocking (2 hours, room temperature)

- 1344 1. Prepare blocking solution with the following:
  - 1345 • 1x TBS
  - 1346 • 0.1% Triton X-100
  - 1347 • 4% normal donkey serum (NDS)
- 1348 2. Incubate sections in blocking solution for 2 hours at room temperature.
- 1349 3. Maintain gentle agitation throughout incubation.

1350 Primary antibody incubation (48 hours,  $4^{\circ}\text{C}$ )

- 1351 1. Mix primary antibodies in blocking solution prepared above
  - 1352 ○ Mouse anti-c-Fos (1:2000; Santa Cruz, sc-271243)
  - 1353 ○ Rabbit anti-pPDH (1:1000; Cell Signaling Technology #E4V9L)
  - 1354 ○ Sheep anti-TH (1:1000; GeneTex, GTX82570)
- 1355 2. Incubate sections in primary antibody solution for 48 hours at  $4^{\circ}\text{C}$ , maintaining gentle
- 1356 agitation on an orbital shaker.
- 1357 3. Following primary incubation, wash sections 5 x 5 in fresh TBS

## 1358 Secondary antibody incubation (5 hours, room temperature)

- 1359 1. Mix secondaries antibodies in blocking solution

- 1360           ○ cFos: donkey anti-mouse Alexa Fluor 555 (1:1000; Jackson ImmunoResearch)  
 1361           ○ pPDH: donkey anti-rabbit Alexa Fluor 647 (1:1000; Jackson ImmunoResearch)  
 1362           ○ TH: Donkey anti-shee Alexa Fluor 488 (1:1000; Jackson)  
 1363       1. Incubate sections for 5 hours at room temperature, maintaining gentle agitation on orbital  
 1364           shaker.  
 1365       2. Following secondary incubation, wash sections 5 times in fresh TBS, for 5 mins

1366   Nissl counterstaining

- 1367       1. Incubate sections in NT (1:500 in TBS) for 10 minutes at room temperature.  
 1368       2. Maintain gentle agitation and protect from light during incubation.  
 1369       3. wash sections 5 times in fresh TBS, for 5 mins

1370   Mounting and storage

- 1371       1. Mount sections onto glass slides.  
 1372       2. Allow excess buffer to drain without drying tissue.  
 1373       3. Coverslip using glycerol-based antifade mounting medium and #1.5 glass coverslips.  
 1374       4. Store slides at 4°C protected from light.  
 1375       5. Image slides within 48 hours of coverslipping.

1376   cFos, pPDH, TH imaging in SNc

- 1377       1. Perform imaging using a Zeiss LSM 900 confocal microscope.  
 1378       2. Acquire tiled images at 20x magnification to capture the full region of interest.  
 1379       3. Use a sampling rate of 0.4 sampling and 4x line averaging to improve signal-to-noise ratio.  
 1380       4. Perform an initial low-magnification preview scan to identify the region of interest prior to  
 1381           acquisition.  
 1382       5. Acquire tiled images covering the SNc region and fuse tiles using microscope software to  
 1383           remove stitching artifacts.  
 1384       6. Apply minimal and uniform background adjustment across images to improve signal-to-  
 1385           noise ratio.  
 1386       7. Export final images as TIFF files without downsampling.  
 1387       8. Image processing and analysis described in sectio 5.3.

1388   5.5.9 *GCAMP IN STRIATUM*

1389   Experimental procedure for cFos analysis

- 1390       1. Oprm1-Cre rats injected with Cre-dependent GCaMP were injected as described in  
 1391           section 2.3.  
 1392       2. To optimize virus tither, rats were euthanized 4 weeks later with perfusion as described in  
 1393           Section 5.5.1.  
 1394       3. Section brains coronally (30 µm) and store tissue in cryoprotectant at -20°C until  
 1395           processing.

1396   Striatum section selection and washes

- 1397       1. TBS  
 1398       2. To localize the viral injection site, briefly screen sections under a brightfield microscope at  
 1399           low magnification (5x).

- 1400 3. Identify sections corresponding to injection site based on the needle track and tissue  
1401 landmarks within the anterior dorsal striatum.  
1402 4. Select three sections per animal centered on the injection site for IHC processing  
1403 5. Wash sections 5 times for 5 minutes each in fresh 1x TBS with gentle agitation.

1404 Blocking (2 hours, room temperature)

- 1405 1. Prepare blocking solution with the following:  
1406 • 1x TBS  
1407 • 0.1% Triton X-100  
1408 • 4% normal donkey serum (NDS)  
1409 2. Incubate sections in blocking solution for 2 hours at room temperature.  
1410 3. Maintain gentle agitation throughout incubation.

1411 Primary antibody incubation (48 hours, 4°C)

- 1412 1. Mix primary antibodies in blocking solution prepared above  
1413 ○ Chicken anti-GFP (1:2000; GFP1020)  
1414 ○ Guinea pig anti-MOR (1:1000; Millipore Sigma AB5509)  
1415 2. Incubate sections in primary antibody solution for 48 hours at 4°C, maintaining gentle  
1416 agitation on an orbital shaker.  
1417 3. Following primary incubation, wash sections 5 x 5 in fresh TBS

1418 Secondary antibody incubation (5 hours, room temperature)

- 1419 1. Mix secondary antibodies in blocking solution  
1420 ○ GFP: donkey anti-chicken Alexa Fluor 488 (1:1000; Jackson)  
1421 ○ MOR: Donkey anti-guinea pig Alexa Fluor 555 (1:1000; Jackson)  
1422 1. Incubate sections for 5 hours at room temperature, maintaining gentle agitation on orbital  
1423 shaker.  
1424 2. Following secondary incubation, wash sections 5 times in fresh TBS, for 5 mins

1425 Nissl counterstaining

- 1426 1. Incubate sections in NT (1:500 in TBS) for 10 minutes at room temperature.  
1427 2. Maintain gentle agitation and protect from light during incubation.  
1428 3. wash sections 5 times in fresh TBS, for 5 mins

1429 Mounting and storage

- 1430 1. Mount sections onto glass slides.  
1431 2. Allow excess buffer to drain without drying tissue.  
1432 3. Coverslip using glycerol-based antifade mounting medium and #1.5 glass coverslips.  
1433 4. Store slides at 4°C protected from light.  
1434 5. Image slides within 48 hours of coverslipping.

1435 GCaMP and MOR imaging in striatum

- 1436 1. Perform imaging using a Zeiss LSM 900 confocal microscope.  
1437 2. Acquire tiled images at 20x magnification to capture the full striatal region of interest.  
1438 3. Use a sampling rate of 0.4 sampling and 4x line averaging to improve signal-to-noise ratio.

- 1439 4. Perform an initial low-magnification preview scan to identify the region of interest prior to  
1440 acquisition.  
1441 5. Acquire tiled images covering the full striatal region and fuse tiles using microscope  
1442 software to remove stitching artifacts.  
1443 6. Apply minimal and uniform background adjustment across images to improve signal-to-  
1444 noise ratio  
1445 7. Export final images as TIFF files without downsampling.  
1446 8. Image processing and analysis described in section 5.3

1447 *5.5.10 OPRM1-CRE INHIBITORY DREADD IHC*

1448 Experimental procedure for cFos analysis

- 1449 4. Oprm1-Cre rats injected with Cre-dependent inhibitory DREADD virus (AAV-hSyn-DIO-  
1450 HA-hM4D(Gi)-IRES-mCitrine) were assigned to experimental groups receiving saline or  
1451 lbutamoren (IBU; 2x) in combination with clozapine-N-oxide (CNO), as described above.  
1452 To maintain DREADD activation across the experimental window, rats received two CNO  
1453 injections: an initial injection concurrent with saline or IBU administration, followed by a  
1454 second injection 1.5 hours later. A third group did not receive any injections, and was used  
1455 for validation of the virus.  
1456 5. Return rats to their home cage with ad libitum access to food and water.  
1457 6. Allow rats to remain undisturbed for 3.5 hours following the initial injection.  
1458 7. Following the 3.5-hour incubation period, perform transcardial perfusion as described in  
1459 Section 5.5.1.  
1460 8. Section brains coronally (30  $\mu$ m) and store tissue in cryoprotectant at  $-20^{\circ}\text{C}$  until  
1461 processing.

1462 Striatum section selection and washes

- 1463 6. TBS  
1464 7. To localize the viral injection site, briefly screen sections under a brightfield microscope at  
1465 low magnification (5x).  
1466 8. Identify sections corresponding to injection site based on the needle track and tissue  
1467 landmarks within the anterior dorsal striatum.  
1468 9. Select three sections per animal centered on the injection site for IHC processing.  
1469 10. Wash sections 5 times for 5 minutes each in fresh 1x TBS with gentle agitation.

1470 Blocking (2 hours, room temperature)

- 1471 4. Prepare blocking solution with the following:  
1472 • 1x TBS  
1473 • 0.1% Triton X-100  
1474 • 4% normal donkey serum (NDS)  
1475 5. Incubate sections in blocking solution for 2 hours at room temperature.  
1476 6. Maintain gentle agitation throughout incubation.

1477 Primary antibody incubation (48 hours,  $4^{\circ}\text{C}$ )

- 1478 4. Mix primary antibodies in blocking solution prepared above.  
1479 ○ mouse anti-cFos (1:2000; Santa Cruz, sc-272343)  
1480 ○ Rabbit anti-pPDH (1:1000; Cell Signaling Technology #E4V9L)  
1481 ○ Guinea pig anti-MOR (1:1000; Millipore Sigma AB5509)  
1482 ○ Goat anti-HA (1:1000; Cell Signaling Technology)

- 1483 5. Incubate sections in primary antibody solution for 48 hours at 4°C, maintaining gentle  
 1484 agitation on an orbital shaker.  
 1485 6. Following primary incubation, wash sections 5 x 5 in fresh TBS

1486 Secondary antibody incubation (5 hours, room temperature)

- 1487 2. Mix secondaries antibodies in blocking solution  
 1488 ○ cFos: donkey anti-mouse Alexa Fluor 594 (2 drops per mL; Invitrogen)  
 1489 ○ pPDH: donkey anti-rabbit Alexa Fluor 647 (1:1000; Jackson ImmunoResearch)  
 1490 ○ MOR: Donkey anti-guinea pig Alexa Fluor 555 (1:1000; Jackson  
 1491 ImmunoResearch)  
 1492 ○ HA: Donkey anti-goat Alexa Fluor 488 (1:1000; Jackson ImmunoResearch)  
 1493 3. Incubate sections for 5 hours at room temperature, maintaining gentle agitation on orbital  
 1494 shaker.  
 1495 4. Following secondary incubation, wash sections 5 times in fresh TBS, for 5 mins

1496 Nissl counterstaining

- 1497 4. Incubate sections in NT (1:500 in TBS) for 10 minutes at room temperature.  
 1498 5. Maintain gentle agitation and protect from light during incubation.  
 1499 6. wash sections 5 times in fresh TBS, for 5 mins

1500 Mounting and storage

- 1501 6. Mount sections onto glass slides.  
 1502 7. Allow excess buffer to drain without drying tissue.  
 1503 8. Coverslip using glycerol-based antifade mounting medium and #1.5 glass coverslips.  
 1504 9. Store slides at 4°C protected from light.  
 1505 10. Image slides within 48 hours of coverslipping.

1506 cFos, pPDH, MOR, and inhibitory DREADD imaging in striatum

- 1507 9. Perform imaging using a Zeiss LSM 900 confocal microscope.  
 1508 10. Acquire tiled images at 20x magnification to capture the full striatal region of interest.  
 1509 11. Use a sampling rate of 0.4 sampling and 4x line averaging to improve signal-to-noise ratio.  
 1510 12. Perform an initial low-magnification preview scan to identify the region of interest prior to  
 1511 acquisition.  
 1512 13. Acquire tiled images covering the full striatal region and fuse tiles using microscope  
 1513 software to remove stitching artifacts.  
 1514 14. Apply minimal and uniform background adjustment across images to improve signal-to-  
 1515 noise ratio  
 1516 15. Export final images as TIFF files without downsampling.  
 1517 16. Image processing and analysis described in section 5.3.

1518 *5.5.11 OPRM1-CRE EXCITATORY DREADD*

1519 Experimental procedure

- 1520 1. Oprm1-Cre rats injected with Cre-dependent excitatory (AAV-hSyn-DIO-hM3D(Gq)-  
 1521 mCherry) DREADD viruses and were assigned to experimental groups receiving saline or  
 1522 lbutamoren (IBU; 2x) in combination with clozapine-N-oxide (CNO), as described above.  
 1523 To maintain DREADD activation across the experimental window, rats received two CNO

- 1524 injections: an initial injection concurrent with saline or IBU administration, followed by a  
 1525 second injection 1.5 hours later  
 1526 2. Return rats to their home cage with ad libitum access to food and water.  
 1527 3. Allow rats to remain undisturbed for 3.5 hours following the initial injection.  
 1528 4. Following the 3.5-hour incubation period, perform transcatheter perfusion as described in  
 1529 Section 5.5.1.  
 1530 5. Section brains coronally (30  $\mu$ m) and store tissue in cryoprotectant at  $-20^{\circ}\text{C}$  until  
 1531 processing.

1532 Striatum section selection and washes

- 1533 1. Remove free-floating sections from cryoprotectant and transfer into 1x TBS  
 1534 2. To localize the viral injection site, briefly screen sections under a brightfield microscope at  
 1535 low magnification (5x).  
 1536 3. Identify sections corresponding to injection site based on the needle track and tissue  
 1537 landmarks within the anterior dorsal striatum.  
 1538 4. Select three sections per animal centered on the injection site for IHC processing  
 1539 5. Wash sections 5 times for 5 minutes each in fresh 1x TBS with gentle agitation.

1540 Blocking (2 hours, room temperature)

- 1541 1. Prepare blocking solution with the following:  
 1542
  - 1x TBS
  - 0.1% Triton X-100
  - 4% normal donkey serum (NDS)  
 1543 2. Incubate sections in blocking solution for 2 hours at room temperature.  
 1544 3. Maintain gentle agitation throughout incubation.

1547 Primary antibody incubation (48 hours,  $4^{\circ}\text{C}$ )

- 1548 1. Mix primary antibodies in blocking solution prepared above  
 1549
  - o mouse anti-cFos (1:2000; Santa Cruz, sc-272343)
  - o Rabbit anti-pPDH (1:1000; Cell Signaling Technology #E4V9L)
  - o Guinea pig anti-MOR (1:1000; Millipore Sigma AB5509)  
 1550 2. Incubate sections in primary antibody solution for 48 hours at  $4^{\circ}\text{C}$ , maintaining gentle  
 1551 agitation on an orbital shaker.  
 1552 3. Following primary incubation, wash sections 5 x 5 in fresh TBS  
 1553  
 1554

1555 Secondary antibody incubation (5 hours, room temperature)

- 1556 1. Mix secondaries antibodies in blocking solution  
 1557
  - o cFos: donkey anti-mouse Alexa Fluor 555 (1:1000; Jackson ImmunoResearch)
  - o pPDH: donkey anti-rabbit Alexa Fluor 647 (1:1000; Jackson ImmunoResearch)
  - o MOR: Donkey anti-guinea pig Alexa Fluor 488 (1:1000; Jackson)
  - o FRP: 594  
 1558 1. Incubate sections for 5 hours at room temperature, maintaining gentle agitation on orbital  
 1559 shaker.  
 1560 2. Following secondary incubation, wash sections 5 times in fresh TBS, for 5 mins  
 1561  
 1562  
 1563

1564 Nissl counterstaining

- 1565 1. Incubate sections in NT (1:500 in TBS) for 10 minutes at room temperature.  
 1566 2. Maintain gentle agitation and protect from light during incubation.

1567 3. wash sections 5 times in fresh TBS, for 5 mins

1568 **Mounting and storage**

- 1569 1. Mount sections onto glass slides.
- 1570 2. Allow excess buffer to drain without drying tissue.
- 1571 3. Coverslip using glycerol-based antifade mounting medium and #1.5 glass coverslips.
- 1572 4. Store slides at 4°C protected from light.
- 1573 5. Image slides within 48 hours of coverslipping.

1574 **cFos, pPDH, MOR, and excitatory DREADD imaging in striatum**

- 1575 1. Perform imaging using a Zeiss LSM 900 confocal microscope.
- 1576 2. Acquire tiled images at 20x magnification to capture the full striatal region of interest.
- 1577 3. Use a sampling rate of 0.4 sampling and 4x line averaging to improve signal-to-noise ratio.
- 1578 4. Perform an initial low-magnification preview scan to identify the region of interest prior to acquisition.
- 1579 5. Acquire tiled images covering the full striatal region and fuse tiles using microscope software to remove stitching artifacts.
- 1580 6. Apply minimal and uniform background adjustment across images to improve signal-to-noise ratio
- 1581 7. Export final images as TIFF files without downsampling.
- 1582 8. Image processing and analysis described in section 5.3.

1586 **6 IN VIVO CALCIUM IMAGING**

1587 **6.1 Optimization of Cre-dependent GCaMP expression**

1588 To validate Cre-dependent GCaMP expression and optimize viral dosing for calcium imaging,  
 1589 initial dilution studies were performed. In a test group (n = 3), each hemisphere received a different  
 1590 viral titer of pGP-AAV-syn-FLEX-GCaMP7f-WPRE-GCaMP7f (Addgene #104492). Rats were  
 1591 allowed 4–6 weeks for viral expression prior to perfusion and histological analysis. Brain sections  
 1592 were examined to identify a dilution that provided the best cellular labeling without signal over-  
 1593 saturation or evidence of tissue damage, and this optimized titer (1:8) was used for all calcium  
 1594 imaging behavior imaging experiments.

1595 **6.2 Calcium imaging experimental set up**

1596 Calcium imaging recordings were conducted beginning approximately 6 to 8 weeks following viral  
 1597 injection and GRIN lens implantation, as described in section 2.4. Neuronal activity was recorded  
 1598 using a miniaturized epifluorescence microscope (nVoke 2.0 system; Inscopix) coupled to a  
 1599 baseplate-integrated GRIN lens. The miniscope was connected to a commutator system to allow  
 1600 unrestricted movement and prevent cable entanglement, and signals were transmitted to the  
 1601 Inscopix data acquisition system (DAQ).

1602 Rats were briefly handled to remove the baseplate cover, then the miniscope was docked and  
 1603 secured to the baseplate by tightening the side screw. Following attachment, rats were returned  
 1604 to their home cage for recording. Imaging parameters were controlled using the online Inscopix  
 1605 Data Acquisition Software (IDAS). Recordings were performed at a frame rate of 20 Hz, while  
 1606 LED power, sensor gain, and electronic focus were adjusted on per each animal to optimize signal  
 1607 quality. Once optimal parameters were established for an individual animal, they were held as

1608 constant as possible across all subsequent recording sessions to ensure consistent imaging of  
1609 the same neuronal population. Field of view alignment was maintained across sessions using  
1610 vasculature.

1611

### 1612 **6.3 Calcium imaging recording sessions following GHSR activation**

1613 Baseline recordings were obtained once rats reached approximately 7 weeks post-surgery. Prior  
1614 to this, rats were recorded every few days beginning ~4 weeks post-surgery to monitor viral  
1615 expression and confirm the presence of stable, active cells.

1616 For experimental sessions, a baseline recording (3 min) was first obtained. Rats were then briefly  
1617 anesthetized to allow for IP injection of saline, IBU, or acyl-ghrelin, and were returned to their  
1618 home cage for imaging. Recordings were conducted at time points corresponding to the  
1619 established pharmacokinetics of each compound, with IBU recordings performed approximately  
1620 2 hours post-injection and acyl-ghrelin recordings performed ~15 minutes post-injection. In vivo  
1621 calcium imaging revealed that intermediate-dose IBU produced peak striosomal activation  
1622 approximately 2 hr following administration. Therefore, behavioral testing was initiated 2 hr post-  
1623 injection, while tissue collection for cFos analysis was performed 3.5 hr post-injection to account  
1624 for both peak IBU activity and the delayed kinetics of cFos protein expression.

1625 For time-curve experiments, rats were recorded immediately following injection and then other  
1626 time points. For IBU, recordings were obtained at 30 minutes post-injection and then hourly for up  
1627 to 5 hours. For acyl-ghrelin, recordings were obtained immediately, and at 10 minutes, 30 minutes,  
1628 1 hour, and 2 hours post-injection. A minimum washout period of 2 days was allowed between  
1629 IBU administrations to ensure complete clearance prior to recordings. Feeding in home cage was  
1630 monitored for 4 hours during IBU and acyl-ghrelin conditions, as described in section 4.4.

### 1631 **6.4 Calcium imaging recording processing**

1632 All recordings were processed using Inscopix Data Processing Software (IDPS) and ImageJ.  
1633 Preprocessing steps included pixel correction, cropping of the field of view (FOV), and spatial  
1634 downsampling (2x) to reduce data size while maintaining sufficient resolution. A bandpass  
1635 Gaussian filter (low:  $0.005 \text{ pixel}^{-1}$ ; high:  $0.5 \text{ pixel}^{-1}$ ) was applied, followed by motion correction  
1636 using a reference frame to minimize movement-related artifacts. Neuronal activity was quantified  
1637 by manually identifying and counting cells exhibiting visually detectable increases in fluorescence  
1638 intensity, with analyses focused on the number of active neurons per session.

1639 The nVoke miniscope permits adjustment of the focal plane along the z-axis, enabling recordings  
1640 at multiple depths. In some rats, distinct neuronal populations were observed at separate focal  
1641 planes (e.g., 600 and 950 z-plane units). Experiments were repeated at each depth to capture  
1642 these populations, thereby increasing overall sampling. For longitudinal tracking, recordings were  
1643 aligned to a reference cell map to enable tracking of neurons across sessions when the same  
1644 FOV was maintained.

### 1645 **6.5 Exp 10: Calcium imaging of GHSR activation after IBU and aGHR administration**

1646 Statistical comparisons of activity across concentrations were performed using one-way ANOVA  
1647 with appropriate post hoc tests under a within-subject design (**Fig. 3E**). All cell count data tables  
1648 are publicly available (DOI: <https://doi.org/10.7910/DVN/US8QTS> ).

1649 To confirm targeting specificity and implant placement, rats that underwent Inscopix calcium  
 1650 imaging experiments were maintained for up to 6 months and then euthanized for histological  
 1651 validation. Brain tissue was processed for immunohistochemistry as described in 5.5. Sections  
 1652 were labeled for mu-opioid receptor (MOR) to define striosomal compartments, and GCaMP  
 1653 fluorescence was used to identify virus-expressing cells.

## 1654 **7 RABIES-ASSISTED MONOSYNAPTIC TRACING**

1655  
 1656 We used a TRIO (tracing the relationship between input and output) strategy<sup>4</sup> to selectively trace  
 1657 monosynaptic inputs to LHB-projecting GPi neurons using procedures recommended by<sup>5,6</sup>. In a  
 1658 different cohort of rats, we used a standard helper virus and RVΔG injection procedure to achieve  
 1659 Cre-dependent tracing of SNc neurons using *Th-Cre* transgenic rats<sup>7</sup>.

1660

### 1661 **7.1 Intracranial surgery and tissue preparation**

#### 1662 *7.1.1 HELPER VIRUS INJECTION FOR TRIO STRATEGY*

1663 We anesthetized wildtype male and female Sprague-Dawley rats (300-350g) with 5% isoflurane.  
 1664 We administered 2.5 mg/kg ketoprofen for analgesia, shaved the rats to expose the head incision  
 1665 area, and secured rats on a stereotaxic frame and maintained thereafter with 2-3% isoflurane.  
 1666 After treating the incision area with Betadine and 70% ethanol, we made a midline incision large  
 1667 enough to reveal the bregma and lambda landmarks. We used a metal spatula to expose the skull  
 1668 surface and we placed alligator clips to secure the skull surface for craniotomy. We achieved a  
 1669 flat-skull position by adjusting the incisor bar height until the bregma and lambda landmarks were  
 1670 at the same depth, and the incisor bar height was recorded to assist in skull positioning for the  
 1671 second surgery. We used a round burr drill bit to perform craniotomy at the injection sites above  
 1672 the LHB and GPi. After gently removing the dura mater with a syringe tip, we lowered syringes  
 1673 (10 µl Hamilton syringe, 33-gauge blunt tips) to inject the viruses. Virus injections targeted AP  
 1674 -3.4 mm, ML ±0.8 mm, DV -5.0 mm for LHB and AP -2.2 mm, ML ±2.8 mm, DV -7.8 for GPi of  
 1675 the same hemisphere. We injected 500 nl of AAVrg-EF1a-Cre (Addgene, cat# 55636-AAVrg; titer:  
 1676  $2.6 \times 10^{13}$ ) into LHB. We injected 500 nl of a mixture containing AAV1-syn-FLEX-splitTVA-EGFP-  
 1677 tTA (Addgene, cat# 100798-AAV1; titer:  $8.5 \times 10^{10}$  gc) and TREtight-mTagBFP2-B19G (Addgene,  
 1678 cat# 100799-AAV1; titer:  $1.6 \times 10^{12}$  GC/ml) into GPi. Both injections were delivered at 100 nl/min  
 1679 and syringes were withdrawn after a 5 min diffusion period. The incision site was then sutured,  
 1680 and antibiotics were applied to the site. Rats underwent postoperative monitoring for three days.

1681

#### 1682 *7.1.2 HELPER VIRUS INJECTION FOR SNC TRACING*

1683 Surgical procedures follow those described in section 7.1.1. We used *Th-Cre* Long-Evans rats  
 1684 (300-350g) for the SNc tracing experiments<sup>7</sup>. We injected 500 nl of a mixture containing AAV1-  
 1685 syn-FLEX-splitTVA-EGFP-tTA (Addgene, cat# 100798-AAV1; titer:  $8.5 \times 10^{10}$  gc) and TREtight-  
 1686 mTagBFP2-B19G (Addgene, cat# 100799-AAV1; titer:  $1.6 \times 10^{12}$  GC/ml) into SNc. Injections  
 1687 targeted SNc at AP -5.4 mm, ML ±2.2 mm, and DV -7.9 mm.

1688

#### 1689 *7.1.3 RVΔG INJECTIONS FOR TRIO EXPERIMENT*

1690 After 4 weeks from the initial helper virus injection, we performed IC surgery in a BSL2 setting to  
 1691 inject RVΔG. The initial procedures leading up to skull exposure follow the description outlined in  
 1692 7.1.1. RVΔG was rapidly thawed in a water bath warmed to 37 °C, and was immediately placed  
 1693 into an ice bath until syringe loading. Using the same entry site from the previous craniotomy, we  
 1694 positioned injectors to AP -2.2 mm, ML ±2.8 mm, DV -7.8 to target the GPi. We injected the rats

1695 with 500 nl of RVΔG-mCherry (Wickersham Lab, 8.7x10<sup>9</sup> gc/ml) at a 100 nl/min flow rate and 5  
 1696 min diffusion period. Wound closure and postoperative care procedures follow those described in  
 1697 7.1.1. All materials that directly contacted RVΔG were treated with 10% bleach and then  
 1698 discarded. Rats were maintained for 7 days before perfusion to allow virus infection.

1699

#### 1700 7.1.4 RVΔG INJECTIONS FOR SNC TRACING EXPERIMENT

1701 Procedures are identical to 7.1.3 except for the injection target. We targeted SNc at AP -5.4 mm,  
 1702 ML ±2.2 mm, and DV -7.9 mm under the same injection parameters.

1703

#### 1704 7.1.5 TRANSCARDIAL PERFUSION FIXATION

1705 Following a 7 d incubation period, rats were lightly anesthetized and injected with IBU (1 mg/kg,  
 1706 IP) 4 h prior to perfusion. We then deeply anesthetized the rats in isoflurane, and performed  
 1707 transcardial perfusion to circulate 200 ml of isotonic PBS at a flow rate of 60 ml/min. Next, we  
 1708 infused 350 ml of 4% PFA mixed in PBS and brains were carefully removed. We left the brains in  
 1709 the PFA mixture overnight and then transferred them into a 30% sucrose solution in PBS until  
 1710 brains lost buoyancy.

1711

#### 1712 7.1.6 CRYOSTAT SECTIONING

1713 We first blocked the brains by removing half of the cerebellum, we then secured brains onto  
 1714 cryostat pedestals using Leica Cryo-Gel. We used crushed dry ice to rapidly freeze brains. 30 min  
 1715 later, we positioned them on the specimen head of a Leica cryostat and maintained chamber and  
 1716 object temperatures at -16 °C for 15 min prior to cutting. The cutting angle was adjusted to 5 °  
 1717 and we collected 40 μm sections into four series. Cryopreserving was made by mixing isotonic  
 1718 PBS containing 30% ethylene glycol and 20% glycerol. We stored sections at -20 °C in light-  
 1719 protected conditions until further processing.

## 1720 7.2 Histological analysis for retrograde tracing

### 1721 7.2.1 STRIATAL IMMUNOHISTOCHEMISTRY

1722 Tissue sections were shielded from light as much as possible through each of the following IHC  
 1723 steps. We transferred striatal sections from one series into mesh trays containing isotonic PBS  
 1724 and washed them for 10 min with 3 changes (10x3) under gentle agitation to remove  
 1725 cryopreservant. Next, we transferred the well trays into a blocking solution made of PBS  
 1726 containing 0.3% Triton X-100, 2% normal donkey serum. After a 2 h incubation period, we  
 1727 transferred tissues into primary antiserum containing antibodies raised against c-Fos (Host:  
 1728 Mouse, 1:500; Santa Cruz Biotechnology Cat# sc-271243, RRID:AB\_10610067) and the c-  
 1729 terminal of the MOR (Host: Rabbit, 1:1,000; Abcam Cat# ab134054, RRID:AB\_3122135)  
 1730 dissolved in blocking solution. We left tissue sections to incubate for 48 h at 4 °C.

1731 After a 10x3 wash, we transferred tissues into secondary antiserum containing antibodies raised  
 1732 against mouse IgG (Alexa Fluor 488; Donkey, 1:500; Jackson ImmunoResearch Labs Cat# 715-  
 1733 545-151, RRID:AB\_2341099) and rabbit IgG (Alexa Fluor 647; Host: Donkey, 1:500; Jackson  
 1734 ImmunoResearch Labs Cat# 711-605-152, RRID:AB\_2492288) dissolved in blocking solution.  
 1735 Tissue sections were left to incubate at room temperature for 5 h and underwent a final 10x3  
 1736 wash. Free-floating sections were mounted onto glass slides, air-dried, and coverslipped using  
 1737 Dapi-Fluoromount-G (Electron Microscopy Sciences, Cat #17984-24) and sealed with clear nail  
 1738 polish.

## 1739 7.2.2 HISTOLOGICAL LOCALIZATION OF SITE SECTIONS

1740 Tissue sections were shielded from light as much as possible through each of the following IHC  
 1741 steps. We transferred striatal sections from one series into mesh trays containing isotonic PBS  
 1742 and washed them for 10 min with 3 changes (10x3) under gentle agitation to remove  
 1743 cryopreservant. We directly mount the tissue sections onto glass slides after the washes. Once  
 1744 dry, we coverslip with a Fluoromount-G (Electron Microscopy Sciences, Cat #17984-25) medium  
 1745 that lacks DAPI to allow direct visualization of endogenous mTagBFP2 signal.

## 1746 7.3 Microscopy, image processing, and analysis

1747 We used an Olympus VS200 slide scanner to capture epifluorescence images from the RVΔG  
 1748 tracing experiments. We obtained three-channel mosaic images for each section using a x10  
 1749 objective lens and then exported images for the channels separately as grayscale 16-bit PNG-  
 1750 formatted files. We batch-processed image conversion to 8-bit grayscale with Adobe Photoshop  
 1751 by adjusting the *Levels* parameter. Histograms were used to guide the lower and upper bounds  
 1752 to achieve comparable image scaling between subjects. No nonlinear (gamma) transformations  
 1753 were used.

1754 To facilitate analysis of striosomes, we opened the images as different layers on Adobe Illustrator.  
 1755 Bounding boxes were placed around each mCherry-positive neuron, and we toggled between  
 1756 layers to determine whether they colocalized cFos or whether they were in striosomes  
 1757 (determined using the MOR-labeling channel). Bounding boxes were colored and layer-sorted  
 1758 based on cFos colocalization and compartmental membership. We then tabulated the final counts  
 1759 onto excel spreadsheets.

## 1760 7.4 Exp 11: Monosynaptic tracing of striosomal circuit analysis

1761 RV-mCherry+ striosomal neurons were quantified for both projection pathways and compared  
 1762 using an unpaired t-test (**fig. S9T, top**). To determine pathway-specific activation following GHSR  
 1763 stimulation (1x IBU), colocalization of cFos within RV-mCherry+ striosomal neurons was  
 1764 assessed. Counts were expressed as the percentage of RV-mCherry+ striosomal neurons co-  
 1765 expressing cFos. These percentages were compared between GPi Lhb and daSNC pathways  
 1766 using an unpaired t-test (**fig. S9T, bottom**). All statistical analysis were performed using  
 1767 GraphPad Prism.

1768 Raw image datasets are publicly available (DOI: <https://doi.org/10.7910/DVN/ZRLRXV> ).

1769

## 1770 8 MODELING DECISION-MAKING

## 1771 8.1 “Decision-space” model

1772 Here, we test the experimental data against the predictions of the “decision-space” model  
 1773 introduced in our previous work<sup>8</sup>. The decision-space model describes how a specific striatal  
 1774 circuit transforms high-dimensional cortical inputs into context-sensitive choices. Physiologically,  
 1775 cortical neurons excite fast-spiking interneurons (FSIs) and two intermingled populations of  
 1776 projection neurons in the striatum: striosomes (sSPNs) and the surrounding matrix (mSPNs).  
 1777 Striosomal neurons in the direct (dsSPNs) and indirect (isSPNs) pathways each gate distinct  
 1778 subpopulations of midbrain dopamine neurons via globus pallidus internus (GPi) → lateral  
 1779 habenula (LHb) → rostromedial tegmental area (RMTg) → globus pallidus externus (GPe)  
 1780 circuits, respectively. The dopamine signals then feed back onto both sSPNs and mSPNs,  
 1781 controlling which streams of information receive gain and are propagated for decision-making.

1782

1783 Geometrically, each sSPN subpopulation encodes one of several orthogonal “decision-  
 1784 dimensions” (e.g. reward-predominant, cost-predominant), equivalent to the leading principal

1785 components of cortical activity. Dopamine gating probabilistically masks a subset of these axes,  
 1786 carving out a lower-dimensional “decision-space” subspace in which the network operates.  
 1787 Mathematically, this is implemented as a diagonal gain matrix whose entries, set by daSNc activity  
 1788 via a logistic function, select which decision-dimensions are retained.

1789  
 1790 Behaviorally, matrix neurons (dmSPNs/imSPNs) compute action and inaction values by summing  
 1791 cortical inputs along the retained axes. In this way, matrix neurons define choice, given the  
 1792 contextual decision-space. In this framework, simple decisions engage only the most relevant  
 1793 dimension (producing fast, stereotyped choices) and complex trade-offs recruit multiple  
 1794 dimensions (producing nuanced choices).

1795  
 1796 In summary, the model links physiology to behavior via a geometrically-interpretable decision-  
 1797 space.

1798

## 1799 **8.2 Dimension of the decision-space based on striosome->LHb activity**

1800 To model the probability of engaging different numbers of decision-space dimensions, we  
 1801 assumed a total of 10 potential dimensions relevant to the tasks (for details of the model, see  
 1802 **Summary of the “decision-space” model** and our previous work<sup>8</sup>). The probability,  $p$ , of  
 1803 successfully activating any single decision-dimension was made dependent on a generic  
 1804 striosome activity level,  $x$ , following the sigmoid function  $p(x) = 1/(1 + e^{-x})$  as in our previous  
 1805 work<sup>8</sup>. For DMS striosome activity in **Fig. 5D** and **fig. S14I**, we used  $x =$  DMS striosome activity  
 1806 and for DLS striosome activity in **fig. S15I**, we using  $x = -$  DLS striosome activity. Using the  
 1807 binomial probability mass function, we then calculated the exact probabilities of activating 0, 1, or  
 1808 2+ dimensions for a range of  $x$  values between 0 and 4. These probabilities, representing the  
 1809 likelihood of occupying a 0D, 1D, ..., 10D decision-space, were plotted using a stacked area chart  
 1810 to visualize their dependence on the underlying striosome activity.

1811  
 1812 For code, see  
 1813 [https://github.com/dirkbeck/ghrelin\\_project/blob/main/dimensionality\\_by\\_strio\\_activity\\_10\\_levels](https://github.com/dirkbeck/ghrelin_project/blob/main/dimensionality_by_strio_activity_10_levels.py)  
 1814 [.py](#)

1815  
 1816 **Approach/avoid behavior based on the decision-space**  
 1817 To link changes to the striosome->LHb circuit to context-dependent decision-making, we use our  
 1818 decision-space model of the circuit (for details of the model, see **Summary of the “decision-  
 1819 space” model** and our previous work<sup>8</sup>). In the model, when striosome->LHb activity is low, the  
 1820 decision-space is high-dimensional, for instance incorporating environmental information about  
 1821 reward and cost into decisions. A low-dimensional decision-space (high striosome->LHb activity)  
 1822 might either incorporate reward or cost, but not both. Using this decision-space constructed by  
 1823 striosomes, LHb, and connected neurons, matrix neurons compute action values.

1824  
 1825 Concretely, our model takes as input two continuous variables, the normalized reward magnitude  
 1826  $I_r \in [0,1]$  and the normalized cost magnitude  $I_p \in [0,1]$ , together with a scalar  $G$  encoding various  
 1827 levels of striosome->LHb activity. We evaluate the model on a  $200 \times 200$  grid of  $(I_r, I_p)$  pairs,  
 1828 computing at each point the probability of avoidance both with and without the sigmoid gating  
 1829 term. The single-trial output is the avoidance probability  $P_{\text{avoid}}(I_r, I_p; G)$ .

1830  
 1831 Mathematically, we represent striosome->LHb activity by a scalar  $D$  and use two sigmoid gates,  
 1832 representing the incorporation of decision-dimensions relevant to the stimuli in the environment  
 1833 (e.g. use a reward-related decision-dimension when reward information is present):

1834

1835 
$$g_1 = \frac{1}{1 + e^{-k_{\text{sig}}(D - \theta_{\text{low}})}}, \quad g_2 = \frac{1}{1 + e^{-k_{\text{sig}}(D - \theta_{\text{high}})}}$$

1836

1837 Where  $k_{\text{sig}}$  is the steepness of the gating sigmoids, and  $\theta_{\text{low}}$ ,  $\theta_{\text{high}}$  are their activation thresholds.

1838

1839 We then define two decision-dimensions:

1840

1841 
$$d_1 = I_r, \quad d_2 = I_p$$

1842

1843 and use  $g_1$  and  $g_2$  (above) to gate contributions on a third decision-dimension that scales with  
1844 both reward and cost,  $I_r I_p$ . We then enforce a relationship where the decision-space grows as  
1845 striosome->activity reduces:

1846

1847 
$$f(D) = 1 - \frac{1}{1 + e^{-k_{\text{dim}}(D - D_{\text{mid}})}}$$

1848

1849 where  $k_{\text{dim}}$  and  $D_{\text{mid}}$  shape the sigmoidal relationship.

1850

1851 We initialize

1852

1853 
$$Q_{\text{avoid}} = w_p I_p, \quad Q_{\text{app}} = w_r I_r$$

1854

1855 where  $w_r$  and  $w_p$  are static weights.

1856

1857 If the dynamic decision-space strategy is used (but not if it is not), we calculate action values  
1858 given the decision-space:

1859

1860 
$$Q_{\text{avoid}} += f(D) \alpha g_3(I_r I_p), \quad Q_{\text{app}} += f(D) \beta g_4(I_r(1 - I_p))$$

1861

1862 where  $\alpha$  and  $\beta$  are scaling coefficients adjusting the sensitivity.

1863

1864 Choices then arise from a softmax rule

1865

1866 
$$P_{\text{avoid}} = \frac{\exp(\gamma Q_{\text{avoid}})}{\exp(\gamma Q_{\text{app}}) + \exp(\gamma Q_{\text{avoid}})}$$

1867

1868 where  $\gamma$  is the softmax gain.

1869

1870 To generate **Fig. 5E** and **fig. S10B**, we evaluate  $P_{\text{avoid}}(D)$  at  $D=0$ ,  $D=1$ , and  $D=10$  (baseline,  
1871 low, high), then define:

1872

1873

1874 
$$\Delta P_{\text{low}}(I_r, I_p) = P_{\text{avoid}}(I_r, I_p; D = 1) - P_{\text{avoid}}(I_r, I_p; D = 0)$$

1875

1876 
$$\Delta P_{\text{high}}(I_r, I_p) = P_{\text{avoid}}(I_r, I_p; D = 10) - P_{\text{avoid}}(I_r, I_p; D = 0)$$

1877

1878 Plotting  $\Delta P$  over  $(I_r, I_p)$  quantifies the model's prediction about how increasing striosome->LHb  
1879 activity selectively increases avoidance in the high-reward, high-cost portion of the grid.

1880  
1881  
1882  
1883

For code, see [https://github.com/dirkbeck/ghrelin\\_project/blob/main/decision\\_making\\_maps.py](https://github.com/dirkbeck/ghrelin_project/blob/main/decision_making_maps.py)

### 8.3 Context- and task-dependent effects on approach/avoid

1884 Here, we illustrate the model's prediction that different ghrelin doses produce context-dependent  
1885 shifts in approach/avoid decision-making. We represent the task context as a continuous variable  
1886  $c \in [0,1]$  (0 = cost only, 0.5 = conflict, 1 = reward only) and IBU dose  $D \in [0,10]$  in arbitrary units.  
1887 Both axes are evaluated on a  $200 \times 200$  grid.  
1888 Because ghrelin hyperactivates the striosome→LHb circuit at moderate doses but not at low or  
1889 high doses (an inverted-U relationship, consistent with our imaging and cFos data), we model  
1890 striosome activity as a Gaussian function of dose:

$$1892 \quad s(D) = \exp\left(-\frac{(D-D_{\text{peak}})^2}{2\sigma_D^2}\right)$$

1891 with peak dose  $D_{\text{peak}} = 3$  and width  $\sigma_D = 1.2$ .  
1893

1894 A baseline decision variable is defined as a linear function of context, capturing the intuition that  
1895 cost-only contexts favor avoidance and reward-only contexts favor approach:  $Q_{\text{base}}(c) = w_{\text{ctx}}(c -$   
1896  $0.5)$ ,  $w_{\text{ctx}} = 6$ . The ghrelin-driven modulation of choice is restricted to conflict-like contexts via a  
1897 Gaussian weighting centered at  $c = 0.5$ :

$$1899 \quad w_{\text{conflict}}(c) = \exp\left(-\frac{(c-0.5)^2}{2\sigma_c^2}\right), \sigma_c = 0.12$$

1898 This captures the experimental finding that IBU changes behavior only when competing reward  
1900 and cost signals are present. The full decision variable is then:

$$1903 \quad Q_{\text{total}}(c, D) = Q_{\text{base}}(c) - w_g w_{\text{conflict}}(c) s(D), w_g = 5$$

1902 where  $w_g$  scales the magnitude of the ghrelin effect. The probability of approach is given by a  
1904 logistic transformation:  
1905

$$1907 \quad P_{\text{approach}}(c, D) = \frac{1}{1 + \exp[-\beta Q_{\text{total}}(c, D)]}, \beta = 10$$

1906 To build the phase diagram (**fig. S10C**), we plot  $P_{\text{approach}}(c, D)$  on a colormap, with the  $P = 0.5$   
1908 contour overlaid in black to mark the boundary between net approach and net avoidance. The  
1909 resulting diagram shows that at low and high doses the boundary sits near  $c = 0.5$  (baseline  
1910 conflict behavior), while at moderate doses (near  $D = 3$ ) the boundary bulges upward, indicating  
1911 that a more reward-dominant context is required to elicit approach. Away from the conflict region,  
1912 behavior is unaffected by dose, reproducing the experimental result that IBU leaves pure reward-  
1913 only and pure cost-only choices unchanged.

1915 For code, see [https://github.com/dirkbeck/ghrelin\\_project/blob/main/phase\\_plot.py](https://github.com/dirkbeck/ghrelin_project/blob/main/phase_plot.py).

1916  
1917

### 8.4 Ability to perform tasks depending on striosome→LHb activity

1918 Task performance was conceptualized as a utility function,  $U(x)$ , which aimed to maximize the  
1919 benefit of meeting task requirements while minimizing a cost associated with deviating from a  
1920 baseline striosome activity level of  $x = 0$ . We used  $n = 4$  potential dimensions and the sigmoid  
1921 activation probability  $p(x) = 1/(1 + e^x)$ , where  $x = \text{DMS striosome activity}$  and  $x =$   
1922  $-\text{DLS striosome activity}$ . The benefit  $B(x)$  for a task requiring at least  $k$  dimensions ( $k \in \{0, 1, 2\}$ )  
1923 was set equal to the cumulative binomial probability  $P(Y \geq k | n = 4, p(x))$ . A quadratic cost  $C(x) =$   
1924  $cx^2$  was subtracted, using a cost factor  $c = 0.1$ . The resulting utility curves  $U(x) = B(x) - C(x)$

1925 for the 0D, 1D, and 2D tasks were plotted over a range of striosome activity  $x$ . The optimal activity  
 1926 level for each task, representing the peak of its respective utility curve, was determined  
 1927 numerically and indicated on the plot. The drop in performance was calculated by setting  
 1928 striosome activity to 2 arbitrary units (for higher dorsomedial striosome activity when ghrelin levels  
 1929 are high) and subtracting the new performance from the optimal performance. A floor of  
 1930 performance of 0 was used.

1931  
 1932 For code, see [https://github.com/dirkbeck/ghrelin\\_project/blob/main/ability\\_to\\_perform\\_tasks.py](https://github.com/dirkbeck/ghrelin_project/blob/main/ability_to_perform_tasks.py).

## 1934 **8.5 Computational Modeling Data and Code Availability**

1935 The published article includes all datasets and code generated or analyzed during this  
 1936 study. Code generated for this study have been deposited at github at  
 1937 [https://github.com/dirkbeck/ghrelin\\_project](https://github.com/dirkbeck/ghrelin_project).

## 1938 **9 MOTOR ANALYSIS**

1940 All functions are submitted under DOI: <https://doi.org/10.5281/zenodo.20651417>

1941 To point the reader to each specific method and function, we also used:  
 1942 <https://github.com/atanugiri/GhrelinBehaviorQuantification.git>

1943 Data is published at DOI: <https://doi.org/10.7910/DVN/G8CBKJ>.

### 1944 **9.1 Video Acquisition and Preprocessing**

1945 Motor behavior was analyzed from behavioral trials described in section 4. A single camera  
 1946 captured four mazes simultaneously and each recording was therefore separated as a single  
 1947 video file containing the activity of rats in four independent separate arenas. The videos can be  
 1948 found at DOI: <https://doi.org/10.7910/DVN/G8CBKJ>. To enable individual analysis of each maze,  
 1949 videos were automatically split into four quadrants using a custom Python script  
 1950 `split_video_quadrants.py`  
 1951 ([https://github.com/atanugiri/GhrelinBehaviorQuantification/blob/main/scripts/analysis/split\\_video](https://github.com/atanugiri/GhrelinBehaviorQuantification/blob/main/scripts/analysis/split_video_quadrants.py)  
 1952 `o_quadrants.py`). Each split video was stored and processed independently in subsequent steps.  
 1953 The split videos can also be found at the same data deposit. This preprocessing was performed  
 1954 specifically to enable quantitative motor analysis of individual rats.

### 1955 **9.2 Pose Estimation with DeepLabCut**

1956 Pose estimation and model training were carried out using **DeepLabCut (v3.0.0rc8)**<sup>9</sup>. Training  
 1957 and inference were executed on a CUDA-enabled laboratory workstation equipped with an  
 1958 NVIDIA T1000 GPU (cuDNN v9.01.00), and PyTorch v2.5.1+cu121 was used for model training.  
 1959 The purpose of this step was to estimate the pose of different body parts from behavioral videos,  
 1960 enabling quantitative analysis of motor features. Video recordings of rats performing the  
 1961 behavioral task were provided as input; the trained DeepLabCut model produced per-frame x–y  
 1962 coordinates and likelihoods for each labeled body part. These pose time series were the primary  
 1963 input for all downstream analyses (feature extraction, summary statistics, and hypothesis testing).  
 1964 To provide a clear overview of the workflow, the major steps in the DeepLabCut pipeline are  
 1965 described below.

1966 a) A DeepLabCut project was first initialized using representative behavioral videos as input.  
 1967 The output of this step was a project directory containing the configuration file and  
 1968 registered video paths. Following project creation, additional recordings were incorporated  
 1969 using the command:

1970 `deeplabcut.add_new_videos(config_path, new_videos, copy_videos=True,`  
1971 `extract_frames=False)`

1972 b) For frame extraction, representative frames were sampled from each video. The input was  
1973 the set of registered videos, and the output was a collection of still images stored in  
1974 the labeled-data subdirectory of the project. We extracted five frames per video using  
1975 automatic uniform sampling. Each frame was then cropped manually to retain only the  
1976 maze region, thereby excluding irrelevant portions of the field of view. This step was  
1977 performed with:

1978 `deeplabcut.extract_frames(  
1979 config_path, mode='automatic',  
1980 algo='uniform',  
1981 crop='GUI',  
1982 userfeedback=True  
1983 )`

1984 c) The extracted frames were then labeled interactively. The input was the set of sampled  
1985 and cropped frames, and the output consisted of annotation files in .h5/.csv format along  
1986 with labeled images in the project's labeled-data subdirectory. Labeling was performed  
1987 using the napari-DeepLabCut GUI, which allowed manual annotation of the predefined  
1988 body parts specified in the configuration file (Head, Neck, Midback, Lowerback, Tailbase,  
1989 and four maze corners). This step was initiated with:

1990 `deeplabcut.label_frames(config_path)`

1991 d) The annotated frames were subsequently inspected to confirm labeling accuracy. The  
1992 input was the labeled dataset, and the output was a visual verification of correct placement  
1993 of body-part labels across frames. This quality-control step was carried out with:

1994 `deeplabcut.check_labels(config_path)`

1995 e) Before training, a train/test dataset was generated from the labeled frames. The input was  
1996 the manually annotated images from the labeled-data subdirectory, and the output was a  
1997 structured training dataset stored within the project's training-datasets directory. This step  
1998 was performed with:

1999 `deeplabcut.create_training_dataset(config_path)`

2000 f) Network training was then performed using the training dataset as input. The output of this  
2001 step was a trained ResNet-50-based model capable of predicting body-part positions  
2002 across video frames. Training was carried out on the laboratory workstation equipped with  
2003 an NVIDIA T100 GPU, running for 200 epochs. The process was executed with:

2004 `deeplabcut.train_network(  
2005 config_path,  
2006 shuffle=1,  
2007 trainingsetindex=0,  
2008 device="cuda:0",  
2009 max_snapshots_to_keep=5,  
2010 displayiters=100,  
2011 save_epochs=5,  
2012 epochs=200,  
2013 )`

2014 g) After training, the accuracy of the network was evaluated. The input was the trained model  
2015 along with the annotated training and test frames, and the outputs were both quantitative  
2016 error metrics and diagnostic plots that compared manual labels against model-predicted  
2017 points. This assessment was carried out with:

2018 `deeplabcut.evaluate_network(config_path, shuffle=1, plotting=True)`

2019 h) Once satisfactory accuracy was confirmed, the trained network was applied to the full set  
2020 of behavioral videos. The input was the list of registered videos, and the output consisted

2021 of pose-estimation files (.h5 and .csv) containing x–y coordinates and likelihoods for each  
 2022 labeled body part across all frames. This step was executed with:

```
2023 deeplabcut.analyze_videos(  
2024     config_path,  
2025     videos=videolist,  
2026     shuffle=1,  
2027     gputouse="cuda:0",  
2028     save_as_csv=True  
2029 )
```

2030 i) The resulting trajectory files, containing x–y coordinates and likelihood values for each  
 2031 body part across frames, were further refined using the median filter implementation  
 2032 provided by DeepLabCut. The input was the set of raw pose-estimation files, and the  
 2033 output was a set of filtered .csv files with low-confidence detections removed based on a  
 2034 likelihood threshold of 0.05. This filtering was performed with:

```
2035 deeplabcut.filterpredictions(  
2036     config_path,  
2037     videolist,  
2038     shuffle=1,  
2039     filtertype='median',  
2040     p_bound=0.05  
2041 )
```

2042 The filtered trajectory files were subsequently used as the input for all downstream feature  
 2043 extraction analyses.

2044 Motor Feature Extraction for Behavioral Tasks Presented Under **fig. S12, S14.**

2045

### 2046 9.3 Estimation of trajectory curvature

2047 Represented in (**fig. S11A, S13**).

2048

#### 2049 9.3.1 CODE LOCATION AND EXECUTION

2050 All analyses were run from the project root  
 2051 <https://github.com/atanugiri/GhrelinBehaviorQuantification/blob/main/runme.sh>.

2052 The DeepLabCut pose-estimation output files (CSV format) are archived at DOI  
 2053 <https://doi.org/10.7910/DVN/G8CBKJ>. To reproduce the analyses, users should download the  
 2054 Dataverse archive and extract the pose-estimation CSVs into the data directory of the project root  
 2055 (<https://github.com/atanugiri/GhrelinBehaviorQuantification/tree/main/data>). The database table  
 2056 (dlc\_table) containing metadata and trial information is also located in the data directory as CSV  
 2057 files for offline analysis

2058 (<https://github.com/atanugiri/GhrelinBehaviorQuantification/tree/main/data>).

2059

2060 The curvature feature was implemented in trajectory\_curvature module (  
 2061 [https://github.com/atanugiri/GhrelinBehaviorQuantification/blob/main/scripts/features/trajectory\\_](https://github.com/atanugiri/GhrelinBehaviorQuantification/blob/main/scripts/features/trajectory_curvature.py)  
 2062 [curvature.py](https://github.com/atanugiri/GhrelinBehaviorQuantification/blob/main/scripts/features/trajectory_curvature.py)). Figures and statistical reports generated by the runme.sh from the project root and  
 2063 are saved in results directory. Detailed statistical results can be found in the ‘Statistical data  
 2064 deposition section’. Source code, notebooks, and environment files are archived at Zenodo: DOI:  
 2065 [10.5281/zenodo.20651417](https://doi.org/10.5281/zenodo.20651417). All computations were performed in Python (NumPy, SciPy, pandas,  
 2066 Matplotlib, seaborn) using Visual Studio Code with Jupyter notebook integration.

2067

#### 2068 9.3.2 INPUT DATA AND NORMALIZATION OF POSE TRAJECTORIES.

2069 For each trial, pose trajectories (DeepLabCut outputs) and frame rate were accessed via CSV  
 2070 metadata table. Body-part coordinates were obtained with

2071 [https://github.com/atanugiri/GhrelinBehaviorQuantification/blob/main/scripts/analysis/normalized](https://github.com/atanugiri/GhrelinBehaviorQuantification/blob/main/scripts/analysis/normalized_bodypart.py)  
 2072 [\\_bodypart.py](https://github.com/atanugiri/GhrelinBehaviorQuantification/blob/main/scripts/analysis/normalized_bodypart.py), which returns temporally interpolated and spatially min–max normalized  
 2073 coordinates in a fixed, unit-like arena space.

2074 *9.3.3 CURVATURE COMPUTATION FOR TRAJECTORIES.*

2075 Per-frame curvature was then defined as:

$$2076 \kappa(t) = \frac{|\dot{x}(t)\ddot{y}(t) - \dot{y}(t)\ddot{x}(t)|}{(\dot{x}(t)^2 + \dot{y}(t)^2)^{3/2}} \dots\dots (1)$$

2077 Where,

- 2078 •  $x(t)$  and  $y(t)$  be the (optionally smoothed) Cartesian coordinates of the tracked body part  
 2079 at frame  $t$ .
- 2080 •  $\dot{x}(t)$  and  $\dot{y}(t)$  are the first temporal derivatives of  $x(t)$  and  $y(t)$ , respectively.
- 2081 •  $\ddot{x}(t)$  and  $\ddot{y}(t)$  are the corresponding second temporal derivatives.

2082 To avoid unstable values at near-zero speeds, frames with speed below a threshold were set to  
 2083 0. We used `speed_thresh = 1e-2` (normalized-units/s) unless stated otherwise. The per-trial  
 2084 summary statistic was the mean of all finite  $\kappa(t)$  values.

2085

2086 *9.3.4 KEY HYPERPARAMETERS FOR TRAJECTORY CURVATURE FUNCTION.*

2087 When smoothing is enabled,  $x(t)$  and  $y(t)$  are each convolved with a moving-average (boxcar)  
 2088 filter using `scipy.ndimage.uniform_filter1d`. We used a symmetric window of `window = 23` samples  
 2089 (odd length enforced internally); smoothing was applied before derivative estimation. The  
 2090 following parameters were used: `bodypart = 'Midback'`, `smooth = True`, `window = 23` samples,  
 2091 `speed_thresh = 1e-2` normalized-units/s, and `time_limit = None` (full trial). Per-trial frame rate was  
 2092 read from the database and validated to be  $> 0$ . Batch processing across multiple trials was  
 2093 performed thereafter, which applies the computation to lists of trial IDs and returns aggregated  
 2094 DataFrames suitable for statistical analysis.

2095

## 2096 **9.4 Quantification of locomotor velocity**

2097 Represented in **fig. S11B, S13**

2098

2099 *9.4.1 CODE LOCATION AND EXECUTION.*

2100 Velocity was analyzed to quantify locomotor activity over time. The velocity feature was  
 2101 implemented in `motion_features` module  
 2102 ([https://github.com/atanugiri/GhrelinBehaviorQuantification/blob/main/scripts/features/motion\\_fe](https://github.com/atanugiri/GhrelinBehaviorQuantification/blob/main/scripts/features/motion_features.py)  
 2103 [atures.py](https://github.com/atanugiri/GhrelinBehaviorQuantification/blob/main/scripts/features/motion_features.py)). Project structure, data organization, and archival details are as described in section  
 2104 9.3 of the estimation of trajectory curvature section above.

2105 *9.4.2 INPUT DATA AND NORMALIZATION OF POSE TRAJECTORIES.*

2106 Input data handling and normalization procedures are identical to those described for trajectory  
 2107 curvature (section 9.3.2).

2108 *9.4.3 VELOCITY COMPUTATION.*

2109 Let  $(x_k, y_k)$  denote the (normalized) body-part coordinates at time  $t_k = k/\text{frame\_rate}$ . We first  
 2110 compute frame-to-frame displacement

$$2111 d_k = \sqrt{(x_{k+1} - x_k)^2 + (y_{k+1} - y_k)^2}, \dots\dots(2)$$

2112 and per-frame speed

$$2113 v_k = \frac{d_k}{t_{k+1} - t_k} = \text{frame\_rate} \cdot d_k \quad (\text{for uniform sampling}), \dots\dots(3)$$

2114 Here,

- 2115 •  $x_k, y_k$ : normalized  $x$ - and  $y$ -coordinates of the selected body part at frame  $k$ ,

- 2116 •  $t_k$ : time (in seconds) corresponding to frame  $k$ ,
- 2117 • frame\_rate: video sampling rate (frames per second),
- 2118 •  $d_k$ : Euclidean distance (displacement) between consecutive frames,
- 2119 •  $v_k$ : instantaneous speed between frame  $k$  and  $k + 1$ .

2120 These arrays are produced by the function, `compute_motion_features` in motion features module.  
 2121 Our scalar velocity metric for each trial is the time-averaged speed expressed in units/min:

$$2122 v_{\text{per min}} = \frac{\sum_k d_k}{t_N - t_0} \times 60 \dots\dots(4)$$

2123 Where,

- 2124 •  $d_k$  denotes the frame-to-frame displacement between consecutive positions.
- 2125 •  $t_N - t_0$  represents the total trial duration in seconds.

2126 This summary statistic is computed by `compute_motion_features_per_minute` function in  
 2127 motion\_features module.

#### 2128 9.4.4 KEY HYPERPARAMETERS OF VELOCITY FUNCTION.

2129 Velocity was computed for bodypart = 'Head', with smooth = False (no temporal smoothing), and  
 2130 time\_limit = None (full trial). Batch processing across multiple trials was performed thereafter,  
 2131 which applies the computation to lists of trial IDs and returns aggregated DataFrames with per-  
 2132 trial velocity metrics suitable for statistical analysis.

### 2133 9.5 Quantification of head–body angle (radians)

2134 Represented in **fig. S11C, S13**.

#### 2135 9.5.1 CODE LOCATION AND EXECUTION.

2136 Angle features were implemented in `angle_features` module  
 2137 ([https://github.com/atanugiri/GhrelinBehaviorQuantification/blob/main/Python\\_scripts/Feature fu](https://github.com/atanugiri/GhrelinBehaviorQuantification/blob/main/Python_scripts/Feature_functions/angle_features.py)  
 2138 [nctions/angle\\_features.py](https://github.com/atanugiri/GhrelinBehaviorQuantification/blob/main/Python_scripts/Feature_functions/angle_features.py)). Project structure, data organization, and archival details are as  
 2139 described in section 9.3, trajectory curvature section above.

#### 2140 9.5.2 INPUT DATA AND NORMALIZATION OF POSE TRAJECTORIES.

2141 Input data handling and normalization procedures are identical to those described for trajectory  
 2142 curvature (section 9.3.2), with pose coordinates loaded directly from DeepLabCut CSV output  
 2143 files and filtered by likelihood threshold.

#### 2144 9.5.3 COMPUTATION OF HEAD–BODY ANGLE.

2145 We defined two vectors per frame:

$$2146 \mathbf{v}_{\text{body}} = \mathbf{h} - \mathbf{t} \quad (\text{Tailbase} \rightarrow \text{Head}), \quad \mathbf{v}_{\text{head}} = \mathbf{h} - \mathbf{n} \quad (\text{Neck} \rightarrow \text{Head}) \dots\dots(5)$$

2147 Where,

- 2148 •  $\mathbf{h}, \mathbf{n}, \mathbf{t}$  are the Head, Neck, and Tailbase coordinates.

2149 The head–body angle,  $\theta_{\text{HB}}(t)$  was defined as the signed angle (in radians) between the  
 2150 instantaneous body and head direction vectors:

2151 The *head–body angle*  $\theta_{\text{HB}}(t)$  is the signed angle (radians) between these vectors,

$$2152 \theta_{\text{HB}}(t) = \text{atan2}(u_x v_y - u_y v_x, \mathbf{u} \cdot \mathbf{v}) \dots\dots(6)$$

2153 Where,

- 2154 •  $\mathbf{u} = \mathbf{v}_{\text{body}}$  and  $\mathbf{v} = \mathbf{v}_{\text{head}}$  denote the unit vectors representing the body and head  
 2155 orientations, respectively.

2156 By convention, positive values indicate a counterclockwise rotation of the head relative to the  
 2157 body axis;  $\theta_{\text{HB}}(t) \in (-\pi, \pi]$  per frame. These computations are performed by the function  
 2158 `angle_features_for_trial` in `angle_features` module, which returns per-frame timeseries data and  
 2159 summary statistics including mean and 95th percentile values for head-body misalignment.

2160 **9.5.4 KEY HYPERPARAMETERS OF HEAD–BODY ANGLE FUNCTION.**

2161 We used: likelihood\_threshold = 0.65 (filtering low-confidence pose estimates), smooth\_window  
 2162 = None (no smoothing applied), and body parts Head, Neck, Midback, Lowerback, and Tailbase  
 2163 for feature extraction. Per-trial frame rate was retrieved from the database metadata and validated  
 2164 to be >0. Batch processing across multiple trials was performed thereafter, which applies the  
 2165 computation to lists of trial IDs and returns aggregated DataFrames with per-trial angle metrics  
 2166 suitable for statistical analysis.

2167

2168 **9.6 Analysis of detailed movement metrics**

2169 To test whether the rats moved differently across contexts, we extracted four movement metrics  
 2170 from the x- and y- coordinates of the rats as they performed the tasks. During this process, raw  
 2171 positional records (X\_center, Y\_center) were first cleansed of missing values and then smoothed  
 2172 in time using a one-frame Gaussian kernel to suppress jitter without altering overall path structure.

2173

2174 From the smoothed coordinates we computed instantaneous displacements

$$2175 \quad d_i = \sqrt{(x_{i+1} - x_i)^2 + (y_{i+1} - y_i)^2}$$

2176 and headings

$$2177 \quad \theta_i = \arctan 2 (y_{i+1} - y_i, x_{i+1} - x_i)$$

2178

2179 Turn angles at each time step were defined as the wrapped difference between successive  
 2180 headings,

2181

$$2182 \quad \Delta\theta_i = ((\theta_{i+1} - \theta_i + \pi) \bmod 2\pi) - \pi$$

2183

2184 yielding the signed change in direction.

2185

2186 From these time series we distilled four session-level metrics (see **fig. 12A** for illustrations). The  
 2187 mean step length is simply the average of all  $d_i$  values, reflecting the animal's typical stride. The  
 2188 mean absolute turn-angle is the average of  $|\Delta\theta_i|$ , capturing the magnitude of directional changes  
 2189 irrespective of sign. Turn frequency quantifies the proportion of frames for which  $|\Delta\theta_i|$  exceeds  
 2190  $90^\circ$ , indexing the rate of sharp reorientations. Finally, the MSD exponent describes how spatial  
 2191 dispersion grows with time: we compute the mean squared displacement for integer lags  $l$ ,

2192

$$2193 \quad \text{MSD}(l) = \langle (x_{t+l} - x_t)^2 + (y_{t+l} - y_t)^2 \rangle_t$$

2194

2195 then fit a line to  $\log(\text{MSD})$  versus  $\log(l)$  and take its slope as the exponent. These four metrics  
 2196 together summarize the animal's locomotor scale, turning behavior, reorientation frequency, and  
 2197 exploration-diffusion dynamics.

2198

2199 To create the plots in **fig. S12C**, for each behavioral metric and task in the non-manipulated  
 2200 cohort, we first collated the session-level summaries for rats that underwent both saline and  
 2201 ghrelin treatments. We then performed a two-tailed paired t-test across each metric's saline  
 2202 versus ghrelin values, recording the mean difference and its associated p-value (Food+light mean  
 2203 step length  $p=0.008$ , Toy+light average turn angle  $p=0.011$ , Toy+light diffusion  $p=0.006$ , Toy+light  
 2204 turn frequency  $p=0.009$ ).

2205

2206 To create the plot in **fig. S12C**, we built a table of (task, metric, p) entries from all paired  
 2207 comparisons. For each cell we computed signed\_logp =  $-\log_{10}(p)$  multiplied by the sign of the  
 2208 change in the metric, so that positive bars indicate increases under ghrelin and negative bars

2209 indicate decreases. We then arranged these signed\_logp values into a matrix with tasks on the  
2210 x-axis and metrics represented by offset bars at each task position. Horizontal dashed lines at  $\pm -$   
2211  $\log_{10}(0.05)$  and  $\pm - \log_{10}(0.01)$  delineate significance thresholds, and a central zero line marks  
2212 the transition between positive and negative effects.

2213  
2214 For code, see [https://github.com/dirkbeck/ghrelin\\_project/blob/main/analysis.py](https://github.com/dirkbeck/ghrelin_project/blob/main/analysis.py). For data  
2215 preparation, follow the instructions in the project README  
2216 [https://github.com/dirkbeck/ghrelin\\_project/blob/main/README.md](https://github.com/dirkbeck/ghrelin_project/blob/main/README.md).

2217  
2218 In summary, by computing four key session-level summaries, we quantify the rats' locomotor  
2219 patterns under saline versus ghrelin. Paired comparisons within each task showed that low-dose  
2220 IBU decreased strides in the Food+light context, increased diffusion in the Toy+light context, and  
2221 decreased turns there as well. This analysis confirms that ghrelin's modulation of the striosome-  
2222 >LHb circuit produces measurable, task-specific changes in how rats move.

### 2223 2224 9.6.1 COMPUTATIONAL MODELING DATA AND CODE AVAILABILITY

2225 The published article includes all datasets and code generated or analyzed during this  
2226 study. Excel tables with the x/y coordinate data over time are deposited in the Harvard database,  
2227 see <https://doi.org/10.7910/DVN/TNT3FV>,. Code generated for this study have been deposited at  
2228 github at [https://github.com/dirkbeck/ghrelin\\_project](https://github.com/dirkbeck/ghrelin_project).

2229  
2230

2231 **10 DATA DEPOSITION**

2232

2233 Fig. 1

2234 C-D) Non-conflict and Conflict 2x IBU Long Evans:

2235 Food alone

2236 <https://doi.org/10.7910/DVN/DCB1IH>

2237 Toy alone

2238 <https://doi.org/10.7910/DVN/YMYXO0>

2239 Light alone

2240 <https://doi.org/10.7910/DVN/JW2C3Q>

2241 Food+light

2242 <https://doi.org/10.7910/DVN/0V6WKG>

2243 Toy+light

2244 <https://doi.org/10.7910/DVN/ZUH9YY>

2245

2246 E) Chow in home cage 2x: <https://doi.org/10.7910/DVN/GFLZYM>

2247

2248 F) Food consumption in Food alone task 2x: <https://doi.org/10.7910/DVN/GFLZYM>

2249

2250 G) Food consumption in Food+light task 2x: <https://doi.org/10.7910/DVN/GFLZYM>

2251

2252 H) 10x IBU Non-conflict vs. conflict: <https://doi.org/10.7910/DVN/OE73LI>

2253

2254 Analysis for Fig.1 C-G: <https://doi.org/10.7910/DVN/KJAMMP>

2255

2256 Fig. 2

2257 A-C) IHC of DMS striatum for cFos analysis:

2258 Raw Data: <https://doi.org/10.7910/DVN/KRAGMO>

2259 Analysis: <https://doi.org/10.7910/DVN/NEVZXF>

2260

2261 D-F) IHC of DMS striatum for GHSR expression:

2262 Raw Data: <https://doi.org/10.7910/DVN/UHTDDW>

2263 Analysis: <https://doi.org/10.7910/DVN/SNSRF4>

2264

2265 G-H) IHC of biotinylated-ghrelin in striatum:

2266 Raw Data: <https://doi.org/10.7910/DVN/KRAGMO>

2267 Analysis: <https://doi.org/10.7910/DVN/SNSRF4>

2268

2269 J-K) IHC of LHb for cFos analysis after IBU:

2270 Raw Data: <https://doi.org/10.7910/DVN/D5BCOY>

2271 Analysis: <https://doi.org/10.7910/DVN/JWSLB>

2272

2273 L-M) IHC of daSNc for pPDH, TH, and cFos analysis after IBU:

2274 Raw Data: <https://doi.org/10.7910/DVN/AVMV9E>

2275 Analysis: <https://doi.org/10.7910/DVN/JWSLB>

2276

2277 Fig. 3

2278

2279 A-B) OPRM1-cre DREADD expression:

2280 Raw data: <https://doi.org/10.7910/DVN/C9VBK7>

2281 Analysis: <https://doi.org/10.7910/DVN/QLVA4X>

2282  
2283 C-E) In-vivo calcium imaging following intermediate doses of IBU or aGHR, including food  
2284 consumption data:  
2285 Raw Data: <https://doi.org/10.7910/DVN/US8QTS>

2286  
2287 Fig. 4

2288  
2289 C) IHC of striosomes with DREADD manipulation in cre-OPRM1:  
2290 Raw Data: <https://doi.org/10.7910/DVN/C9VBK7>  
2291 Analysis: <https://doi.org/10.7910/DVN/QLVA4X>

2292  
2293 D) Non-conflict Oprm1 2x:  
2294 Raw Data: <https://doi.org/10.7910/DVN/TNT3FV>,  
2295 Analysis: <https://doi.org/10.7910/DVN/KJAMMP>

2296  
2297 E) Conflict Oprm1 2x:  
2298 Raw Data: <https://doi.org/10.7910/DVN/TNT3FV>,  
2299 Analysis: <https://doi.org/10.7910/DVN/KJAMMP>

2300  
2301 F) IHC of Lateral habenula with DREADD manipulation in cre-OPRM1:  
2302 Raw Data: <https://doi.org/10.7910/DVN/CT9ATL>  
2303 Analysis: <https://doi.org/10.7910/DVN/QLVA4X>

2304  
2305 G) IHC of daSNC with DREADD manipulation in cre-OPRM1:  
2306 Raw Data: <https://doi.org/10.7910/DVN/N7FGMH>  
2307 Analysis: <https://doi.org/10.7910/DVN/QLVA4X>

2308  
2309 Fig. 5  
2310 [https://github.com/dirkbeck/ghrelin\\_project](https://github.com/dirkbeck/ghrelin_project)

2311  
2312

2313  
2314 Supplemental fig. 1  
2315  
2316 A) Baseline of simple tasks Oprm1 WT: <https://doi.org/10.7910/DVN/OE73LI>  
2317  
2318 B, left) Food alone task 2x Long Evans: <https://doi.org/10.7910/DVN/DCB1IH>  
2319  
2320 B, right) Food alone task 2x Oprm1 WT: <https://doi.org/10.7910/DVN/NTB2PG>  
2321  
2322 C, left) Toy alone task 2x IBU Long Evans: <https://doi.org/10.7910/DVN/YMYXO0>  
2323  
2324 C, right) Toy alone task 2x Oprm1 WT: <https://doi.org/10.7910/DVN/NTB2PG>  
2325  
2326 D, left) Light alone task 2x IBU Long Evans: <https://doi.org/10.7910/DVN/JW2C3Q>  
2327  
2328 D, right) Light alone task 2x Oprm1 WT: <https://doi.org/10.7910/DVN/NTB2PG>  
2329  
2330 E, left) Food+light task 2x IBU Long Evans: <https://doi.org/10.7910/DVN/0V6WKG>  
2331  
2332 E, right) Food+light alone task 2x Oprm1 WT: <https://doi.org/10.7910/DVN/NTB2PG>  
2333  
2334 F, left) Toy+light task 2x IBU Long Evans: <https://doi.org/10.7910/DVN/ZUH9YY>  
2335  
2336 F, right) Toy+light alone task 2x Oprm1 WT: <https://doi.org/10.7910/DVN/NTB2PG>  
2337  
2338  
2339 G) Long Evans and Oprm1-WT performance across all tasks:  
2340 Food alone  
2341 <https://doi.org/10.7910/DVN/DCB1IH>  
2342 Toy alone  
2343 <https://doi.org/10.7910/DVN/YMYXO0>  
2344 Light alone  
2345 <https://doi.org/10.7910/DVN/JW2C3Q>  
2346 Food+light  
2347 <https://doi.org/10.7910/DVN/0V6WKG>  
2348 Toy+light  
2349 <https://doi.org/10.7910/DVN/ZUH9YY>  
2350  
2351 Analysis for S1: <https://doi.org/10.7910/DVN/KJAMMP>  
2352  
2353  
2354 Supplemental fig. 2  
2355  
2356 A) Non-conflict tasks 10x IBU Oprm1 WT : <https://doi.org/10.7910/DVN/OE73LI>  
2357  
2358 B) Food alone task 10x IBU Oprm1 WT: <https://doi.org/10.7910/DVN/OE73LI>  
2359  
2360 C) Toy alone task 10x IBU Oprm1 WT: <https://doi.org/10.7910/DVN/OE73LI>  
2361  
2362 D) Light alone task 10x IBU Oprm1 WT: <https://doi.org/10.7910/DVN/OE73LI>  
2363

- 2364 E) Conflict tasks 10x IBU Oprm1 WT: <https://doi.org/10.7910/DVN/OE73LI>  
2365  
2366 F) Food+light task 10x IBU Oprm1 WT: <https://doi.org/10.7910/DVN/OE73LI>  
2367  
2368 G) Toy+light task 10x IBU Oprm1 WT: <https://doi.org/10.7910/DVN/OE73LI>  
2369  
2370 H) Chow in home cage 10x: <https://doi.org/10.7910/DVN/GFLZYM>  
2371  
2372 I) Food consumption in Food alone task 10x: <https://doi.org/10.7910/DVN/GFLZYM>  
2373  
2374 J) Food consumption in Food+light task 10x: <https://doi.org/10.7910/DVN/GFLZYM>  
2375  
2376 Analysis for S2: <https://doi.org/10.7910/DVN/KJAMMP>  
2377  
2378  
2379 Supplemental fig. 3  
2380  
2381 A-D) cFOS IHC in 50 brain regions after 1x IBU:  
2382 Raw Data/ analysis: <https://doi.org/10.7910/DVN/DTXBD5>  
2383 <https://doi.org/10.7910/DVN/EI60AH>  
2384 <https://doi.org/10.7910/DVN/PYW4WW>  
2385  
2386 E-Q): IHC analysis in striatum for cFos and MOR after 1x IBU:  
2387 Analysis: <https://doi.org/10.7910/DVN/EI60AH>  
2388  
2389 R): IHC across 50 brain regions following IBU:  
2390 Raw Data/ analysis: <https://doi.org/10.7910/DVN/DTXBD5>  
2391 <https://doi.org/10.7910/DVN/EI60AH>  
2392 <https://doi.org/10.7910/DVN/PYW4WW>  
2393  
2394 S-T): IHC of DMS striatum for cFos analysis after 0.5x and 10x IBU:  
2395 Raw Data: <https://doi.org/10.7910/DVN/KRAGMO>  
2396  
2397 U-V) IHC of DMS striatum for GHSR expression:  
2398 Raw Data: <https://doi.org/10.7910/DVN/UHTDDW>  
2399  
2400 W) IHC of BGHR in striatum:  
2401 Raw Data: <https://doi.org/10.7910/DVN/KRAGMO>  
2402  
2403  
2404 Supplemental fig. 4  
2405  
2406 A) IHC of LHb for cFos analysis after IBU:  
2407 Raw Data: <https://doi.org/10.7910/DVN/D5BCOY>  
2408  
2409 B-C) IHC of daSNc for pPDH, TH, and cFos analysis after IBU:  
2410 Raw Data: <https://doi.org/10.7910/DVN/AVMV9E>  
2411 Analysis: <https://doi.org/10.7910/DVN/JWSLB>  
2412  
2413 D) Left: Correlation between DMS strio and LHb fos  
2414 DMS striosomes cFos IHC:

- 2415 Raw Data: <https://doi.org/10.7910/DVN/KRAGMO>  
2416 Analysis: <https://doi.org/10.7910/DVN/NEVZXF>  
2417 LHb cFos IHC  
2418 Raw Data: <https://doi.org/10.7910/DVN/D5BCOY>  
2419 Analysis: <https://doi.org/10.7910/DVN/JWSLB>  
2420  
2421 Right: Correlation between DMS striosomes cFos and daSNC pPDH:  
2422 DMS striosomes cFos IHC:  
2423 Raw Data: <https://doi.org/10.7910/DVN/KRAGMO>  
2424 Analysis: <https://doi.org/10.7910/DVN/NEVZXF>  
2425 daSNC pPDH  
2426 Raw Data: <https://doi.org/10.7910/DVN/AVMV9E>  
2427 Analysis: <https://doi.org/10.7910/DVN/JWSLB>  
2428  
2429  
2430 E) Correlation between LHb fos and daSNC pPDH:  
2431 LHb cFos IHC:  
2432 Raw Data: <https://doi.org/10.7910/DVN/D5BCOY>  
2433 Analysis: <https://doi.org/10.7910/DVN/JWSLB>  
2434 daSNC pPDH:  
2435 Raw Data: <https://doi.org/10.7910/DVN/AVMV9E>  
2436 Analysis: <https://doi.org/10.7910/DVN/JWSLB>  
2437  
2438 F) Correlation between DMS striosomes cFos and daSNC cFos:  
2439 DMS striosomes cFos IHC:  
2440 Raw Data: <https://doi.org/10.7910/DVN/KRAGMO>  
2441 Analysis: <https://doi.org/10.7910/DVN/NEVZXF>  
2442 daSNC cFos:  
2443 Raw Data: <https://doi.org/10.7910/DVN/AVMV9E>  
2444 Analysis: <https://doi.org/10.7910/DVN/JWSLB>  
2445  
2446 G) IHC of Arcuate nucleus for cFos analysis after IBU:  
2447 Raw Data: <https://doi.org/10.7910/DVN/WANMCY>  
2448 Analysis: <https://doi.org/10.7910/DVN/JWSLB>  
2449  
2450 H) Correlation between DMS striosomes cFos and ARC cFos:  
2451 DMS striosomes cFos IHC:  
2452 Raw Data: <https://doi.org/10.7910/DVN/KRAGMO>  
2453 Analysis: <https://doi.org/10.7910/DVN/NEVZXF>  
2454 ARC cFos IHC:  
2455 Raw Data: <https://doi.org/10.7910/DVN/WANMCY>  
2456 Analysis: <https://doi.org/10.7910/DVN/JWSLB>  
2457  
2458  
2459 Supplemental fig. 5  
2460  
2461 A) In-vivo calcium imaging following intermediate doses of IBU and acyl-ghrelin:  
2462 Raw data: <https://doi.org/10.7910/DVN/US8QTS>  
2463  
2464 B) IPS cell map following 2xIBU injection:  
2465 Analysis: <https://doi.org/10.7910/DVN/US8QTS>

2466  
2467 C) In-vivo calcium imaging following high doses of IBU acyl-ghrelin:  
2468 Raw data: <https://doi.org/10.7910/DVN/US8QTS>  
2469  
2470 D) 2x IBU calcium dynamics time curve:  
2471 Analysis: <https://doi.org/10.7910/DVN/US8QTS>  
2472  
2473 E, left) In-vivo calcium imaging time curve following 2x and 10x IBU:  
2474 Analysis: <https://doi.org/10.7910/DVN/US8QTS>  
2475  
2476 E, right) In-vivo calcium imaging time curve following 4.3 and 86 ug/kg acyl-ghrelin:  
2477 Analysis: <https://doi.org/10.7910/DVN/US8QTS>  
2478  
2479 F) Food consumption following acyl-ghrelin:  
2480 Analysis: <https://doi.org/10.7910/DVN/US8QTS>  
2481  
2482 G) Food consumption following IBU and acyl-ghrelin in moderate and high doses:  
2483 Analysis: <https://doi.org/10.7910/DVN/US8QTS>  
2484  
2485  
2486 Supplemental fig. 6  
2487  
2488 A-D) IHC of striosomes with DREADD manipulation in cre-OPRM1:  
2489 Raw Data: <https://doi.org/10.7910/DVN/C9VBK7>  
2490  
2491 E-I) pPDH IHC of striosomes with DREADD manipulation in cre-OPRM1:  
2492 Analysis: <https://doi.org/10.7910/DVN/QLVA4X>  
2493  
2494  
2495  
2496 Supplemental fig. 7  
2497  
2498 B) Non-conflict tasks:  
2499 Food alone task 2X IBU CRE-OPRM1: <https://doi.org/10.7910/DVN/NTB2PG>  
2500  
2501 Toy alone task 2X IBU CRE-OPRM1: <https://doi.org/10.7910/DVN/NTB2PG>  
2502  
2503 Light alone task 2X IBU CRE-OPRM1: <https://doi.org/10.7910/DVN/NTB2PG>  
2504  
2505 Raw Data Analysis: <https://doi.org/10.7910/DVN/KJAMMP>  
2506  
2507  
2508 C) Conflict tasks:  
2509  
2510 Food+light task 2X IBU CRE-OPRM1: <https://doi.org/10.7910/DVN/NTB2PG>  
2511  
2512 Toy+light task 2X IBU CRE-OPRM1: <https://doi.org/10.7910/DVN/NTB2PG>  
2513  
2514 Raw Data Analysis: <https://doi.org/10.7910/DVN/KJAMMP>  
2515  
2516

2517 Supplemental fig. 8  
2518  
2519 B): IHC of Lateral habenula with DREADD manipulation in Oprm1-cre:  
2520 Raw Data: <https://doi.org/10.7910/DVN/CT9ATL>  
2521  
2522 C: IHC of daSNC with DREADD manipulation in Oprm1-cre:  
2523 Raw Data: <https://doi.org/10.7910/DVN/N7FGMH>  
2524  
2525 D-G): ANOVA post-hoc values following DREADD manipulation in Oprm1-cre:  
2526 Analysis: <https://doi.org/10.7910/DVN/QLVA4X>  
2527  
2528  
2529 Supplemental fig. 9  
2530  
2531 A-N) Monosynaptic tracing of striosomes  
2532 Raw data and analysis: <https://doi.org/10.7910/DVN/ZRLRXV>  
2533  
2534  
2535 Supplemental fig. 10  
2536  
2537 A-C): [https://github.com/dirkbeck/ghrelin\\_project](https://github.com/dirkbeck/ghrelin_project)  
2538  
2539  
2540 Supplemental fig. 11  
2541  
2542 A-E) Motor analysis data and scripts:  
2543 Functions: <https://doi.org/10.5281/zenodo.17280633>  
2544 Living Functions: <https://github.com/atanugiri/GhrelinBehaviorQuantification.git>  
2545 Data: <https://doi.org/10.7910/DVN/G8CBKJ>  
2546  
2547 Supplemental fig. 12  
2548  
2549 Motor Analysis: [https://github.com/dirkbeck/ghrelin\\_project](https://github.com/dirkbeck/ghrelin_project)  
2550  
2551  
2552 Supplemental fig. 13  
2553  
2554 A-D) Motor analysis data and scripts:  
2555 Functions: <https://doi.org/10.5281/zenodo.17280633>  
2556 Living Functions: <https://github.com/atanugiri/GhrelinBehaviorQuantification.git>  
2557 Data: <https://doi.org/10.7910/DVN/G8CBKJ>  
2558  
2559  
2560 Supplemental fig. 14  
2561  
2562 A-B): IHC of BGHR in DLS striosome  
2563 Raw Data: <https://doi.org/10.7910/DVN/KRAGMO>  
2564 Analysis: <https://doi.org/10.7910/DVN/SNSRF4>  
2565  
2566  
2567

2568 C): IHC of DMS and DLS striatum for cFos, MOR, and pPDH analysis after IBU:  
2569 Raw Data: <https://doi.org/10.7910/DVN/KRAGMO>

2570  
2571 D): IHC of DMS and DLS striosomes for cFos analysis after IBU:  
2572 Raw Data: <https://doi.org/10.7910/DVN/KRAGMO>  
2573 Analysis: <https://doi.org/10.7910/DVN/NEVZXF>

2574  
2575 E): IHC of DMS and DLS striosomes for pPDH analysis after IBU:  
2576 Raw Data: <https://doi.org/10.7910/DVN/KRAGMO>  
2577 Analysis: <https://doi.org/10.7910/DVN/NEVZXF>

2578  
2579 F) Correlation between striosomes DMS cFos and DLS pPDH:  
2580 DMS striosomes cFos IHC:  
2581 Raw Data: <https://doi.org/10.7910/DVN/KRAGMO>  
2582 Analysis: <https://doi.org/10.7910/DVN/NEVZXF>  
2583 DLS striosomes pPDH IHC:  
2584 Raw Data: <https://doi.org/10.7910/DVN/KRAGMO>  
2585 Analysis: <https://doi.org/10.7910/DVN/NEVZXF>

2586  
2587 G) Excitation-inhibition balance in DMS and DLS  
2588 Analysis: <https://doi.org/10.7910/DVN/NEVZXF>

2589  
2590 H, Left) Striosomal cFos expression in DMS and DLS  
2591 Analysis: <https://doi.org/10.7910/DVN/NEVZXF>

2592  
2593 H, right) Striosomal pPDH expression in DMS and DLS  
2594 Analysis: <https://doi.org/10.7910/DVN/NEVZXF>

2595  
2596 I-J): [https://github.com/dirkbeck/ghrelin\\_project](https://github.com/dirkbeck/ghrelin_project)

2597  
2598  
2599

2600  
2601

2602  
2603

2604

2605 **11 SUPPLEMENTARY TEXT**

2606

2607 **11.1 Supplementary note 1: Ghrelin's effect on the decision-space.**

2608 Our finding that ghrelin administration selectively increases dorsomedial striatum  
 2609 (DMS) striosome activity and impairs decision-making specifically in tasks requiring the  
 2610 integration of conflicting information provides empirical support for our “decision-space” model of  
 2611 the circuit. This Supplementary Note summarizes this framework, integrates it with the existing  
 2612 literature on ghrelin, and speculates on its broader implications for understanding the neural basis  
 2613 of choice under varying internal states and in neuropsychiatric conditions.

2614

2615 **Ghrelin as a regulator of the decision-space**

2616 Our computational model, building upon previous work , conceptualizes decision-making as a  
 2617 process occurring within a multi-dimensional space, where each dimension represents a distinct  
 2618 stream of behaviorally relevant information processed by the cortex (e.g., potential reward,  
 2619 associated cost, novelty, social cues). The model posits that DMS striosomes play a critical role  
 2620 in regulating the dimension of this space, that is, determining which factors are actively  
 2621 considered during a given decision.

2622

2623 The modeled circuit involves projections from cortical areas (like orbitofrontal cortex - OFC,  
 2624 prelimbic cortex - PL, infralimbic cortex - IL) to striosomes, which in turn modulate dopaminergic  
 2625 output from the dopamine neurons of the substantia nigra compacta (daSNc), both directly<sup>5,6</sup> and  
 2626 indirectly via pathways involving the globus pallidus internus (GPi)<sup>7</sup>, lateral habenula (LHb)<sup>7</sup>,  
 2627 and rostromedial tegmental area (RMTg)<sup>8</sup>. Within this network, striosomes parse cortical input  
 2628 along these decision-dimensions. The model proposes an inverse relationship  
 2629 between striosome activity and the complexity of the decision-space. Lower striosome activity  
 2630 (associated with difficult, conflict-rich decisions<sup>9</sup>) facilitates the engagement of more decision-  
 2631 dimensions, allowing for nuanced integration of multiple factors. Conversely,  
 2632 higher striosome activity (associated with simpler, less conflicting decisions<sup>9</sup>) leads to the  
 2633 engagement of fewer dimensions, simplifying the decision process (**Fig. 5c-e**).

2634

2635 Our data indicates that ghrelin administration significantly increases DMS striosome activity. The  
 2636 model predicts that this pharmacologically induced hyperactivity forces the circuit to form a lower-  
 2637 dimensional space, even when faced with complex tasks that would normally benefit from  
 2638 integrating multiple factors. Furthermore, LHb activity, which also inhibits daSNc in the model,  
 2639 might be elevated post-ghrelin. If both striosomes and LHb are hyperactive, this would create  
 2640 convergent pressure towards reducing the dimensionality of the decision-space.

2641

2642 **Reinterpreting ghrelin's effects through the lens of the decision-space**

2643 This model may also explain other context-dependent results in the literature, where it has been  
 2644 found, for instance, to alter impulsivity and reward sensitivity<sup>10,11</sup>. Increased impulsivity (e.g.,  
 2645 reduced willingness to wait for larger rewards) is a predicted consequence of a lower-dimensional  
 2646 decision-space. Considering delayed consequences often requires integrating a ‘temporal cost’  
 2647 or ‘future value’ dimension. If striosomal hyperactivity suppresses this dimension, choices become  
 2648 dominated by immediate factors, manifesting as impulsivity. Similarly, heightened reward  
 2649 sensitivity could arise if the ‘reward’ dimension becomes overwhelmingly prioritized when other  
 2650 competing dimensions are suppressed.

2651

2652

2653

## 2654 **11.2 Supplementary note 2: Movement data supports our policy-IG model of dopamine.**

2655  
2656 Even in those non-conflict conditions, where place-preference choices remained unchanged, we  
2657 consistently observed marked alterations in the rats' movement profiles (**fig. S11-13**). These  
2658 movement changes offer support for the policy-information-gain (policy-IG) model of striosome-  
2659 dopamine circuit function<sup>12</sup>.

2660  
2661 The policy-information-gain (policy-IG) model proposes that dopamine release in the striosome-  
2662 >dopamine->matrix circuit does not broadcast reward-prediction errors but instead encodes an  
2663 information-theoretic measure of how much a new piece of evidence sharpens the animal's action  
2664 policy. Formally, policy-IG is the drop in Shannon entropy of the action distribution when a cue  
2665 arrives, that is, how much the cue reduces uncertainty about which action is best. Through this  
2666 single scalar signal, the circuit simultaneously (1) gates cortical inputs by expanding or contracting  
2667 its decision-space, (2) drives synaptic updates when information gain outweighs representational  
2668 cost, and (3) adjusts the moment-to-moment explore-exploit balance by focusing or broadening  
2669 action probabilities. As a result, dopamine transients reflect not only reward surprises but also  
2670 novelty, aversiveness, and real-time shifts in movement and decision bias.

2671  
2672 Specifically, the model predicts that under control conditions, moment-to-moment bursts in  
2673 dopamine initiate actions and focus trajectories toward or away from salient cues. On the other  
2674 hand, baseline dopamine tunes the exploration-exploitation balance. When IBU  
2675 elevates striosome->LHb inhibition of dopamine, baseline policy-IG decreases. This heightened  
2676 tonic signal narrows the decision-space dimensionality, gating out peripheral information, and  
2677 collapses the action policy toward a few favored movements. This could potentially explain why  
2678 there is significant reduction in movement variability reduction metrics like average turn angle and  
2679 average step length after ghrelin administration in conflict tasks (**fig. S12**).

## 2680 2681 **11.3 Supplementary note 3: Implications for neuropsychiatric disorders**

2682 Our model linking ghrelin to reduced decision-space dimensionality may offer insights into  
2683 neuropsychiatric disorders where both ghrelin dysregulation and decision-making deficits are  
2684 implicated, such as stress-related disorders (PTSD) and addiction (**Table 6**). In these conditions,  
2685 elevated ghrelin levels could contribute to a pathologically constrained decision-making process.  
2686 Individuals might become overly focused on immediate threats (in PTSD) or drug-related cues (in  
2687 addiction), effectively filtering out other relevant dimensions like long-term consequences, social  
2688 costs, or alternative rewards. This reduced dimensionality could manifest as cognitive rigidity,  
2689 difficulty adapting to changing circumstances, and an inability to effectively resolve conflicting  
2690 motivations, all hallmarks of these disorders<sup>11,12</sup>. The ghrelin-striosome axis might therefore  
2691 represent a potential therapeutic target for restoring more flexible, multi-dimensional decision-  
2692 making in these patient populations.

## 2693 2694 2695 **11.4 Supplementary note 4: Limitations**

2696 Ibutamoren is a non-biological agonist for the ghrelin receptor, potentially resulting in ghrelin  
2697 receptor activation that does not mimic biological levels<sup>13,14</sup> despite our efforts (including the  
2698 performance of a dose response assay/curve (**Fig. 3**)) to reasonably match what could be  
2699 biological ranges for IBU and ghrelin receptor activation. We also performed a similar dose  
2700 response experiment comparing calcium dynamics within the striosomes following IBU or  
2701 endogenous ghrelin administration and found that striosomes responded similarly to both agonists  
2702 in a dose-dependent manner. We do not know the reason for the different dose responses to IBU

2703 or where/how the threshold of GHSR stimulation switches from increasing cost-sensitivity to  
2704 appetitive processing. The rat model used in this study is highly specific; however, there may be  
2705 some striosomal properties not observed due to some non-expression, and  
2706 some matrix contributions could potentially be overlooked. The DREADD manipulations  
2707 were striosome-specific while IBU itself binds to multiple different regions, though this specificity  
2708 was useful for illustrating the necessity of striosome activity on behavioral effects observed within  
2709 our paper.  
2710

2711 **12 SUPPLEMENTARY FIGURES**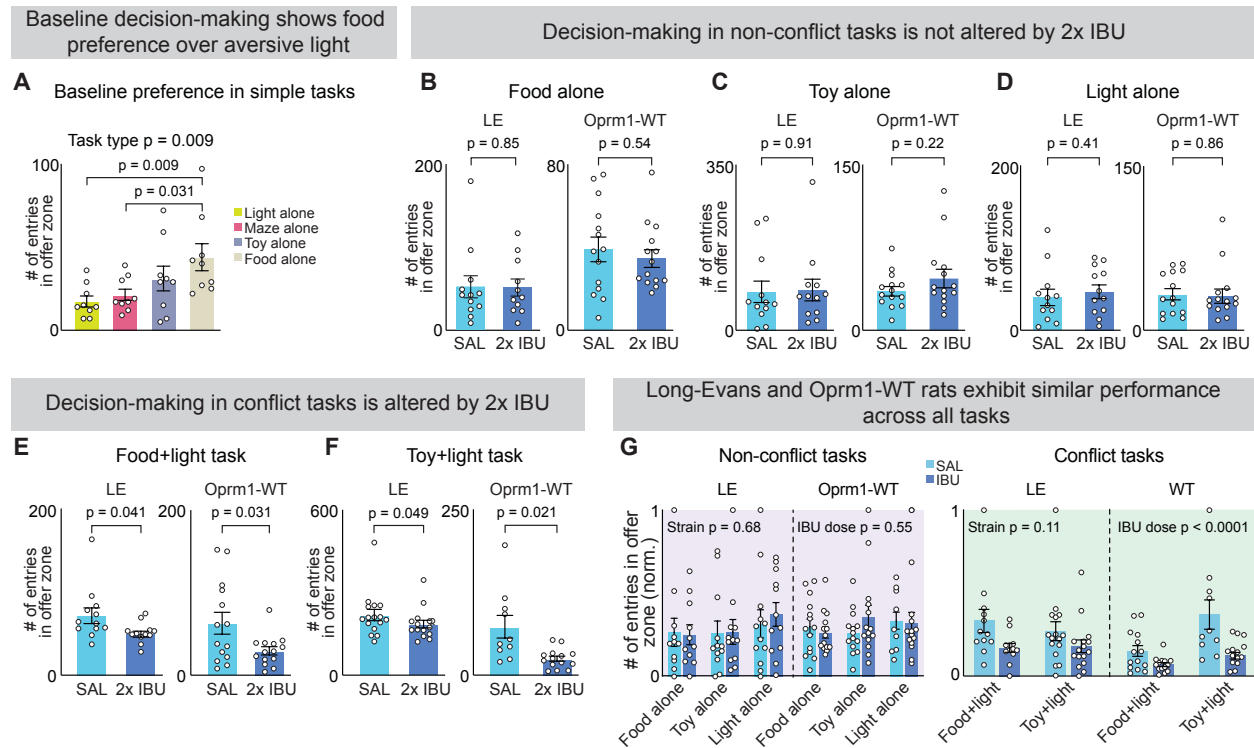

2712

2713

2714 **Figure S1: Conflict decision making task impacted by 2x IBU administration.**

2715 **(A)** Baseline entries differed across non-conflict tasks, with rats showing greater approach toward  
 2716 reward-associated zones (Food and Toy) than neutral (Maze alone) or aversive (Light alone)  
 2717 zones (rats=9, repeated-measures one-way ANOVA,  $p=0.009$ ). **(B-F)** Raw, non-normalized  
 2718 entries into the offer zone are shown for Long-Evans (rats=10-16/group) and Oprm1-WT rats  
 2719 (rats=10-14/group). Consistent with the normalized analyses presented in **Fig. 1C**, 2x IBU did not  
 2720 alter performance in either strain across any non-conflict task (**B**, Food alone; **C**, Toy alone; **D**,  
 2721 Light alone, all  $p>0.05$ ). But during conflict tasks, in both Long-Evans and Oprm1-WT rats, 2x IBU  
 2722 significantly reduced entries into the reward zone relative to SAL treatment (**E**, Food+light; **F**,  
 2723 Toy+light, all  $p<0.05$ ). **(G)** To determine whether strain contributed to the behavioral effects of  
 2724 IBU, normalized data from both cohorts were analyzed using a three-way ANOVA. No effect of  
 2725 strain was observed in either non-conflict (left;  $p=0.68$ ) or conflict (right;  $p = 0.11$ ) tasks. Consistent  
 2726 with the individual task analyses, IBU did not affect non-conflict performance ( $p=0.55$ ) but  
 2727 significantly altered behavior during conflict tasks ( $p<0.0001$ ). Mean  $\pm$  SEM. For additional  
 2728 statistical analyses see table S3.

2729

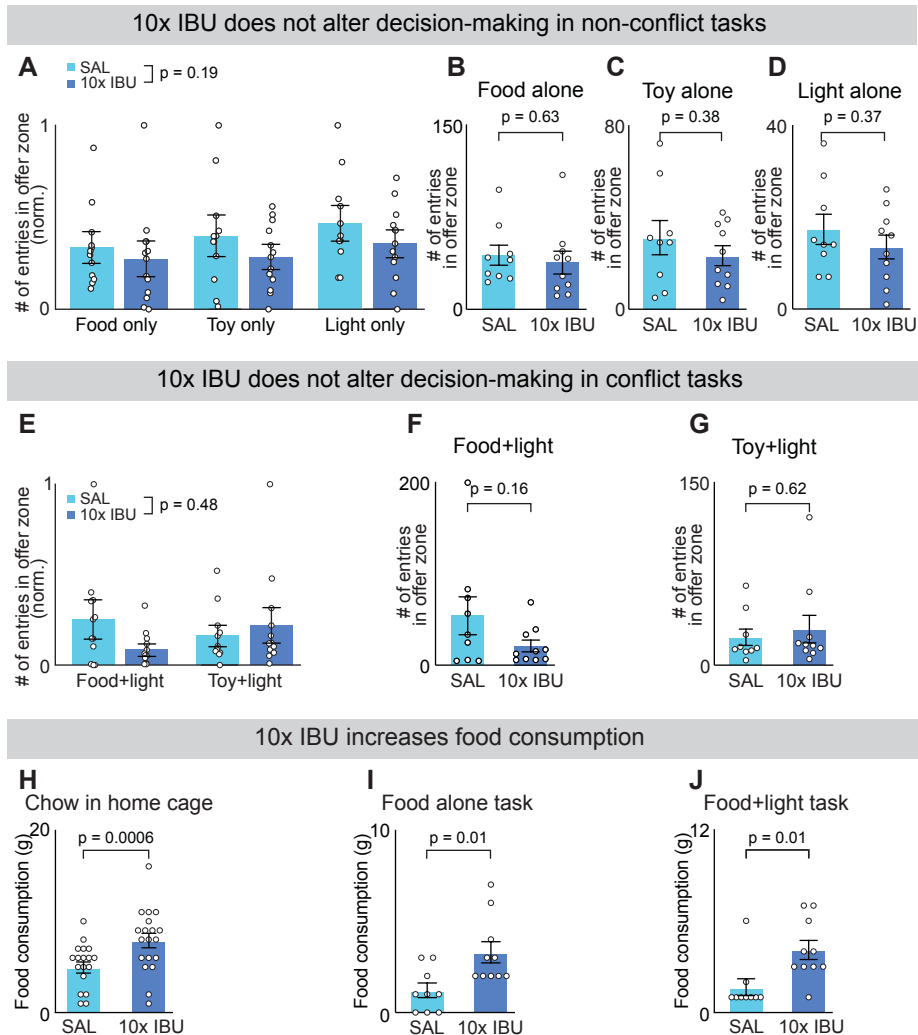

2730

2731 **Figure S2: Administration of 10X IBU does not impact decision-making but increases food**  
 2732 **consumption.**

2733 **(A-D)** High-dose IBU (10x) did not alter performance during non-conflict tasks. No differences  
 2734 were observed between SAL (rats=9) and 10x IBU rats (rats=10) when comparing normalized  
 2735 performance across tasks **(A; two-way ANOVA,  $p=0.19$ )** or individual raw task measures **(B, Food**  
 2736 **alone,  $p=0.63$ ; C, Toy alone,  $p=0.38$ ; D, Light alone,  $p=0.37$ ).** **(E-G)** Unlike 2x IBU, high-dose IBU  
 2737 did not affect conflict-task performance. No differences were observed between SAL and 10x IBU  
 2738 rats when comparing normalized conflict-task performance **(E; two-way ANOVA,  $p=0.48$ )** or  
 2739 individual raw task measures **(F, Food+light,  $p=0.16$ ; G, Toy+light,  $p=0.62$ ).** **(H-J)** In contrast,  
 2740 high-dose IBU significantly increased food consumption. Food intake was elevated in the home  
 2741 cage **(H; rats=19, paired t-test,  $p=0.0006$ ),** during the Food-alone task **(I;  $p=0.01$ ),** and during the  
 2742 Food+light conflict task **(J;  $p=0.01$ ).** Together, these data demonstrate that high-dose IBU

2743 increases feeding without altering decision-making behavior. Mean  $\pm$  SEM. For additional  
2744 statistical analyses, see table S3.

2745

Figure S3

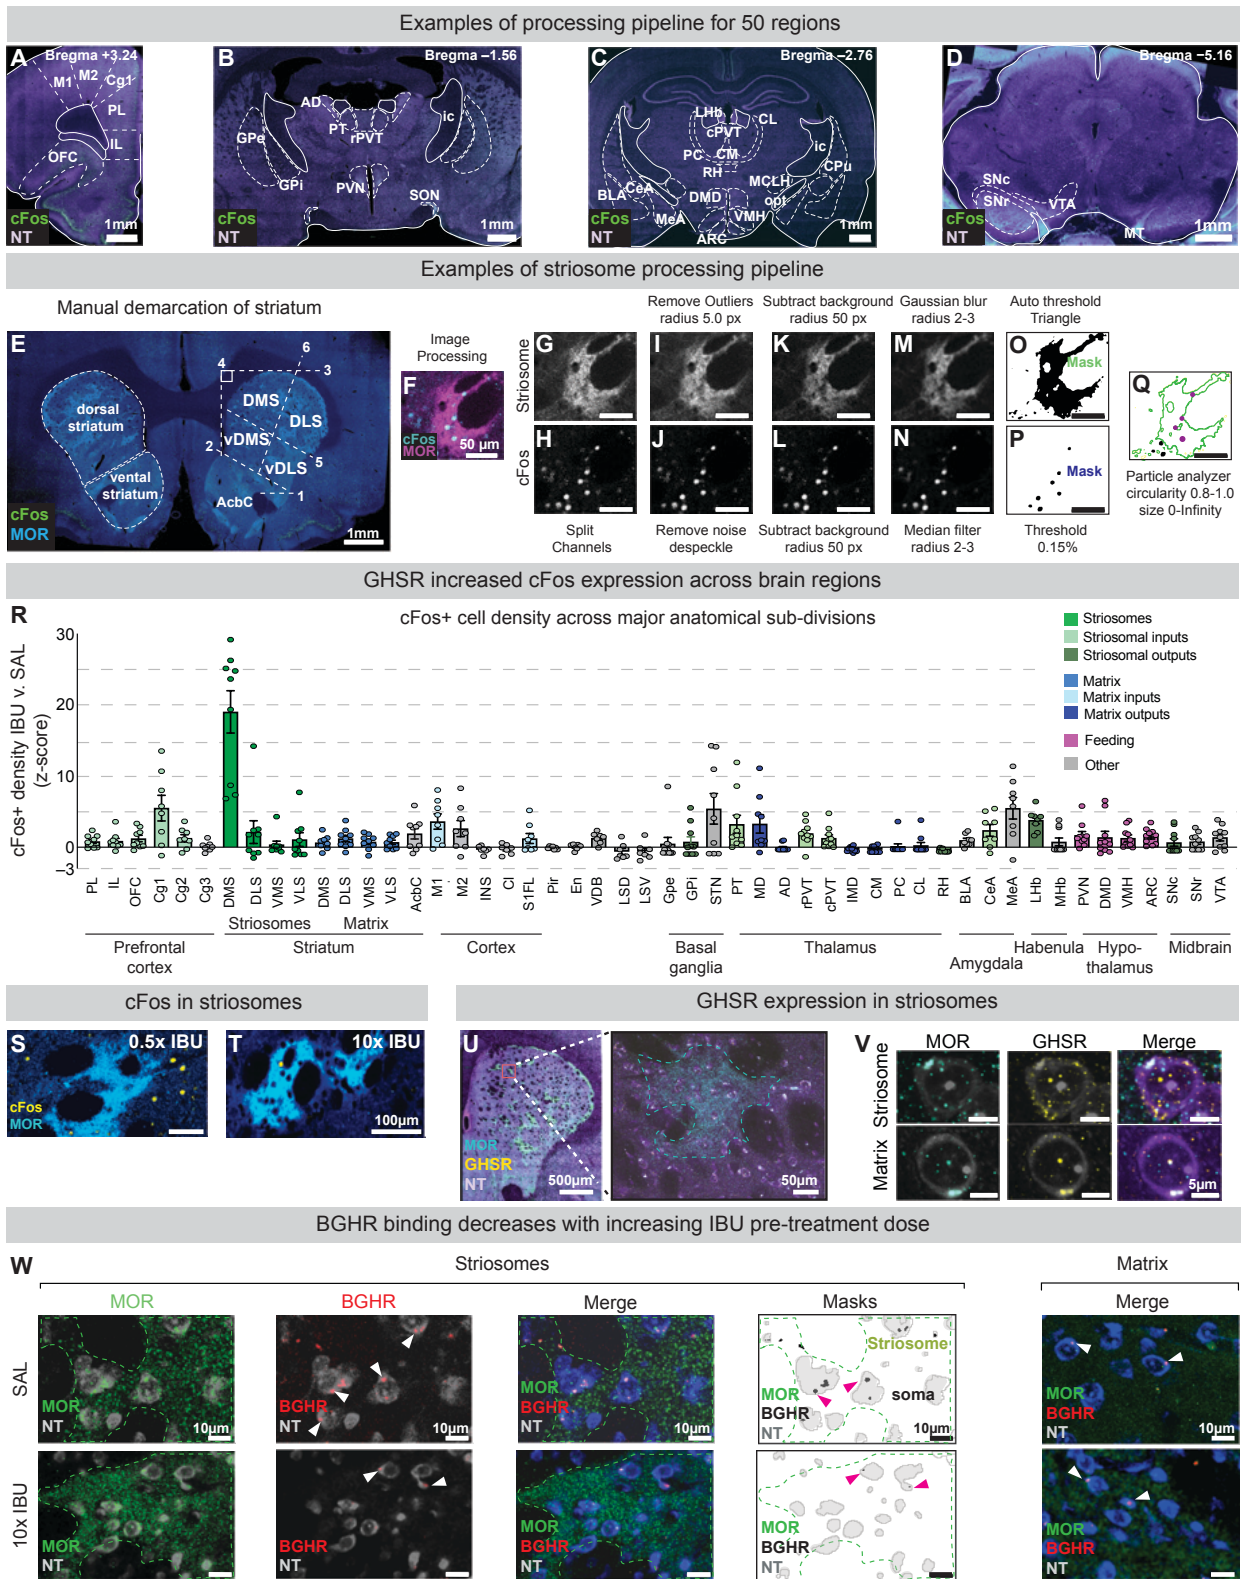

2746  
2747

2748 **Figure S3: Striosomal activation by intermediate IBU doses coincides with striosomal**  
 2749 **enrichment of GHSR signaling.**

2750 **(A)** Representative coronal sections used for whole-brain cFos quantification across 50 brain  
 2751 regions. Section from SAL and 1x IBU rats (rats=7-10/group) were parcellated. Regions were  
 2752 analyzed within 1mm of **(A)** prefrontal cortex, **(B)** rostral thalamus and Gpe/Gpi, **(C)** thalamus,  
 2753 hypothalamus, and amygdala, and **(D)** mid-brain coordinates. See **table S4**. **(E)** Delineation of  
 2754 dorsal striatum into DMS, DLS, vDMS and vDLS. See 5.3.2 of Materials and methods. **(F-Q)**  
 2755 Image processing workflow used for striosomal cFos quantification in ImageJ. **(F)** Merge  
 2756 MOR/cFos images, were split into two channels **(G)** MOR and **(H)** cFos. Overexposed signal was  
 2757 removed **(I-J)**, background signal was subtracted **(K-L)**, and filters were applied **(M-N)** prior to  
 2758 thresholding **(O-P)** to generate binary masks. The MOR mask was converted into a ROI and  
 2759 applied to cFos mask, allowing for particle analysis for cFos-positive cells **(Q)**. **(R)** Z-scored cFos-  
 2760 positive cell densities (cells/mm<sup>2</sup>) across anatomical subdivisions following IBU administration.  
 2761 IBU z-scores were calculated relative to SAL controls as:

$$2762 \quad \text{IBUzscore} = \frac{\text{IBU}_{\text{ROI-density}} - \text{mean}(\text{SAL}_{\text{group-ROI-density}})}{\text{SD}(\text{SAL}_{\text{group-ROI-density}})}$$

2763 **(S-W)** Additional images corresponding to Fig. 2 showing striosomal cFos following 0.5x **(S)** and  
 2764 10x IBU **(T)**, GHSR enrichment in striosomes relative to matrix **(U-V)**, and reduced BGHR binding  
 2765 following 10x IBU treatment relative to SAL **(W)**. Mean ± SEM.

2766

2767

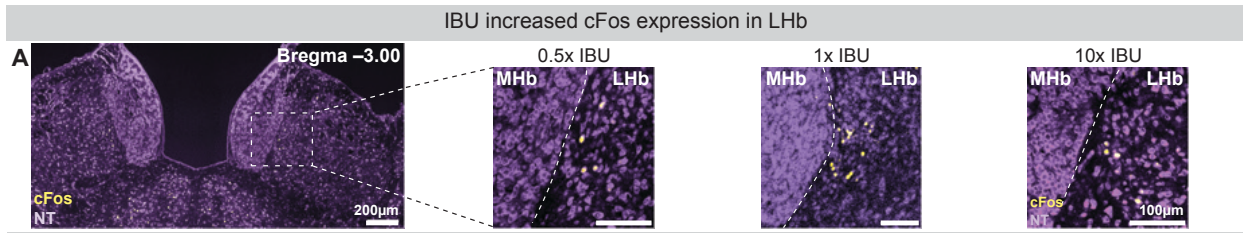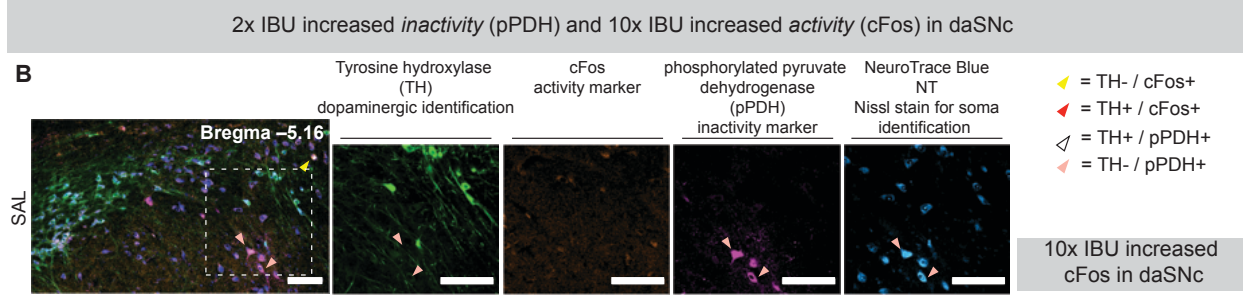

**10x IBU increased cFos in daSNc**

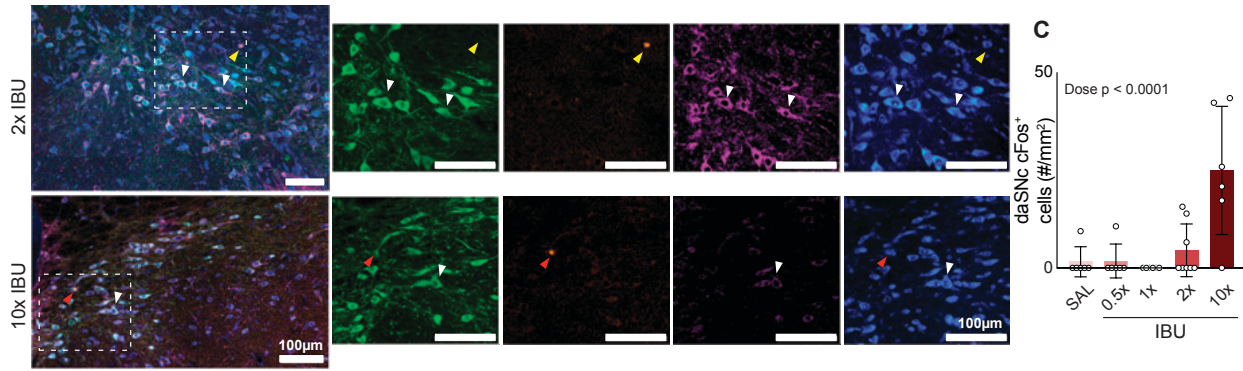

**DMS striosome activity correlates with activity in LHb and daSNc inactivity**

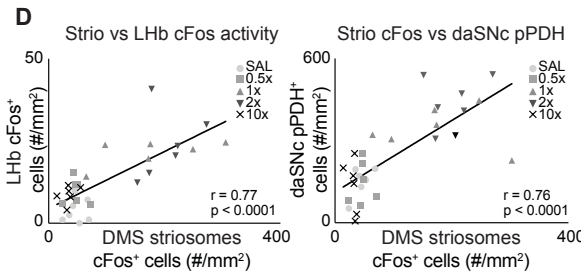

**LHb activity correlates with daSNc inactivity**

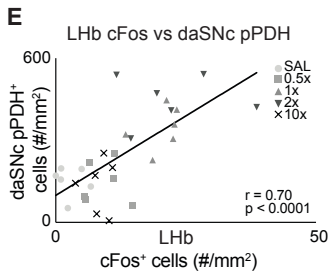

**DMS striosomal activity does not correlate with daSNc activity**

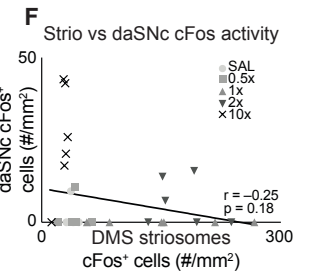

**High dose IBU increases activity in the Arcuate nucleus (hypothalamic region regulating consummatory behavior)**

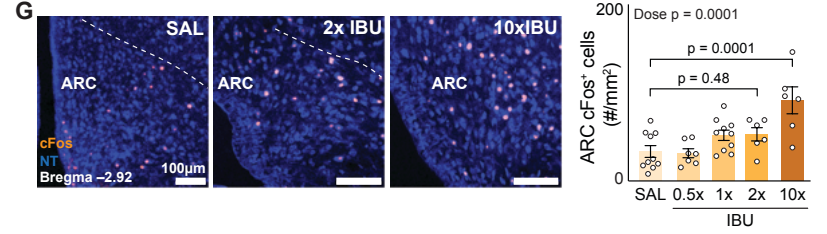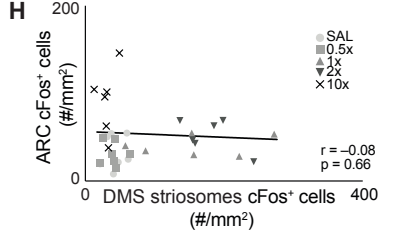

2768  
2769

2770 **Figure S4: IBU dose-dependently modulate LHb, daSNC, and ARC.**

2771 **(A)** Additional LHb images corresponding to **Fig 2J**. Intermediate IBU doses increase cFos (1x  
2772 IBU), whereas low (0.5x) and high (10x) doses were comparable to SAL. **(B-C)** 2x IBU increased  
2773 pPDH expression in daSNC, whereas 10x IBU reduced pPDH and increased cFos expression.  
2774 cFos expression differed across groups (rats=6-8/group), indicating a dose-dependent effect of  
2775 IBU on daSNC **(C, ANOVA, IBU dose,  $p < 0.0001$ )**. **(D-F)** DMS striosomal cFos (rats=31) positively  
2776 correlated with LHb activity **(D, left;  $r = 0.77$ ,  $p < 0.0001$ )** and daSNC inactivity **(D, right;  $r = 0.76$ ,**  
2777  **$p < 0.0001$ )**. LHb cFos also correlated with daSNC pPDH **(E;  $r = 0.70$ ,  $p < 0.0001$ )**. In contrast, DMS  
2778 striosomal and daSNC cFos were not correlated **(F;  $r = -0.25$ ,  $p = 0.18$ )**. **(G-H)** High-dose (10x)  
2779 selectively increased cFos expression in ARC **(G, ANOVA, IBU dose,  $p = 0.0001$ )** with no  
2780 differences among lower doses. ARC and DMS striosomal cFos expression did not correlate **(H;**  
2781 **rats=34,  $r = -0.08$ ,  $p = 0.66$ )**. Mean  $\pm$  SEM. For additional statistical analyses, see table S3.

2782

Moderate doses of IBU and aGHR increase striosomal activity

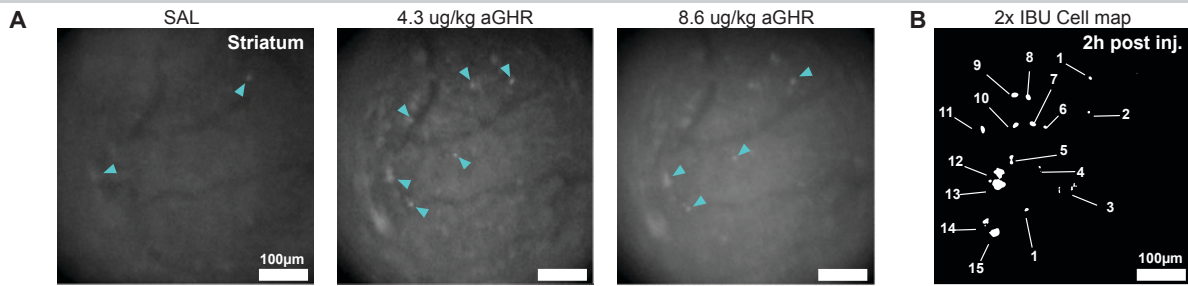

High doses of aGHR decrease striosomal activity

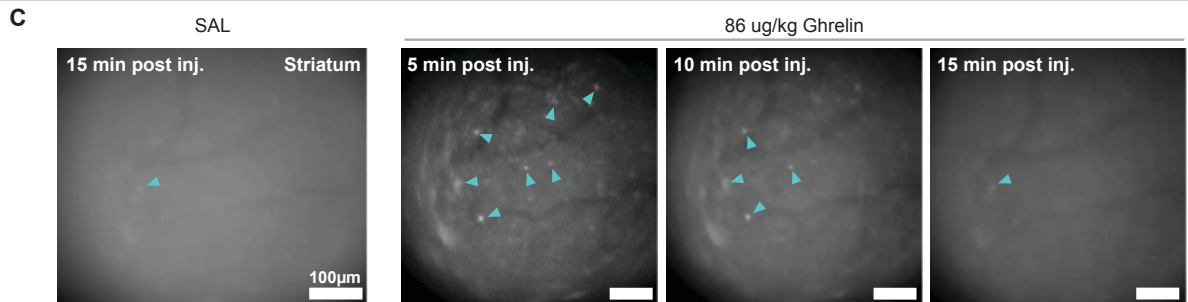

Striosomal hyper- or hypoactivity after GHSR activation

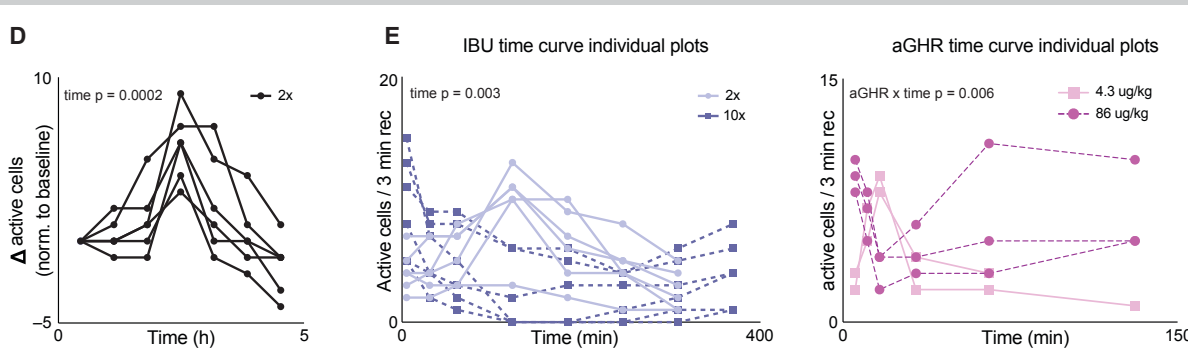

High dose IBU and aGHR increase food consumption

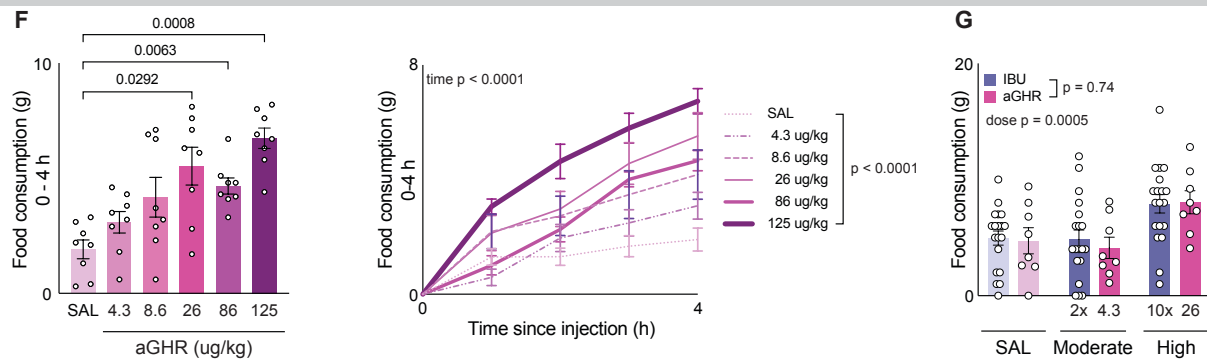

2783  
2784

2785 **Figure S5: IBU or endogenous ghrelin (aGHR) dose-dependently impact striosomal activity**  
2786 **and feeding behavior.**

2787 **(A-C)** Maximum projection images illustrating dose-dependent changes in striosomal activity.  
2788 Compared to SAL **(A, left)**, low/intermediate doses of aGHR **(middle, 4.3; right, 8.6 µg/kg)**  
2789 increased the number of active cells. **(B)** Cell map from 2x IBU recording used in **Fig. 3C**. **(C)**  
2790 High-doses of aGHR (86 µg/kg) reduced activity. Blue arrows indicate active cells. **(D)** Calcium  
2791 activity normalized to each animal's baseline showed 2x IBU increased striosomal activity,  
2792 peaking approximately 2 hours after administration (ANOVA,  $p=0.0002$ ). **(E)** Raw counts of active  
2793 cells (rats=6, fields of view=7), following IBU **(left)** and aGHR **(right)** demonstrate significant time-  
2794 dependent effects of GHSR activation (IBU: time,  $p=0.003$ ; aGHR: aGHR x time interaction  
2795  $p=0.006$ ). For comparison, cell counts were normalized to baseline in **Fig. 3D**. **(F)** aGHR dose-  
2796 dependently increased feeding. Total food consumption differed across doses **(left, ANOVA,**  
2797  $p=0.0009$ ). Higher GHSR activation ( $>26$  µg/kg) increased food intake and accelerated feeding  
2798 onset **(right, effect of time,  $p<0.0001$ ; dose x time  $p=0.001$ )**. **(G)** High doses of both IBU (10x)  
2799 and aGHR (26µg/kg) increased food consumption relative to intermediate doses (2x IBU and  
2800 4.3µg/kg aGHR), with no difference between either IBU or aGHR (ANOVA, dose,  $p=0.0005$ ;  
2801 GHSR activation,  $p=0.74$ ). Mean  $\pm$  SEM. For additional statistical analyses, see table S3.

2802

Striosomal inhibition decreases cFos and increases pPDH, while excitation increases cFos and decreases pPDH

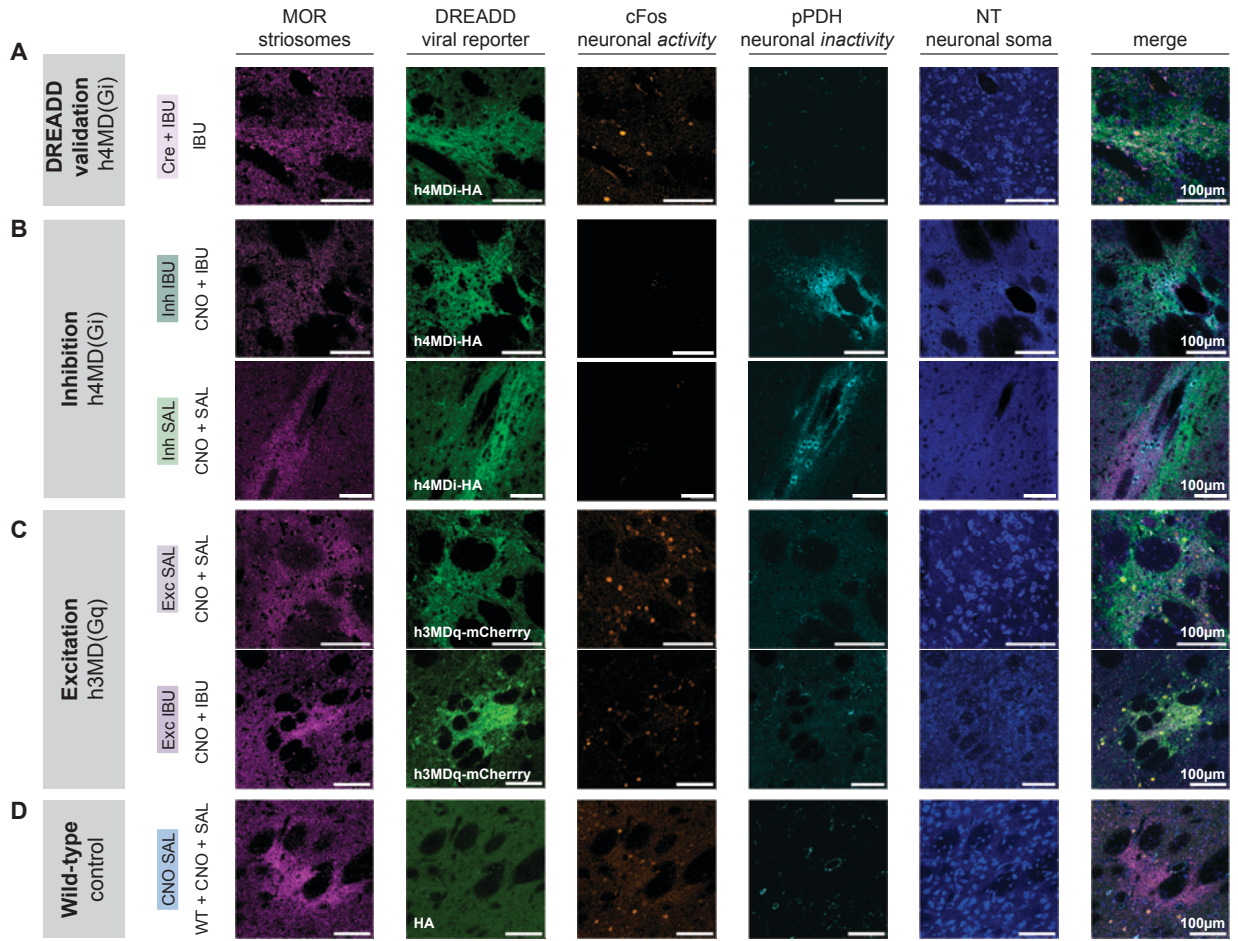

ANOVA post-hoc results of pPDH expression in striosomes (MOR+, virus+ regions)

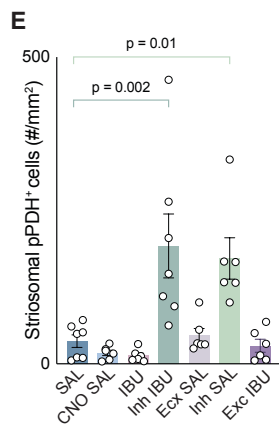

**F** Striosomal inhibition increases pPDH

|         |         |              |
|---------|---------|--------------|
| SAL     | IBU     | p = 0.99     |
| Inh IBU | IBU     | p = 0.0004 ↑ |
| Inh IBU | SAL     | p = 0.002 ↑  |
| Inh IBU | Inh SAL | p > 0.99     |
| SAL     | Inh SAL | p = 0.012 ↑  |
| IBU     | Inh SAL | p = 0.003 ↑  |

**G** Striosomal excitation has no effect on pPDH

|         |         |          |
|---------|---------|----------|
| SAL     | IBU     | p = 0.99 |
| Exc SAL | SAL     | p > 0.99 |
| Exc SAL | IBU     | p = 0.98 |
| Exc SAL | Exc IBU | p > 0.99 |
| SAL     | Exc IBU | p > 0.99 |
| IBU     | Exc IBU | p > 0.99 |

**H** CNO has no effect on pPDH

|         |         |            |
|---------|---------|------------|
| CNO SAL | SAL     | p > 0.99   |
| CNO SAL | IBU     | p > 0.99   |
| CNO SAL | Inh IBU | p = 0.0006 |
| CNO SAL | Inh SAL | p = 0.004  |
| CNO SAL | Exc SAL | p = 0.99   |
| CNO SAL | Exc IBU | p > 0.99   |

**I** Striosomal excitation and inhibition have different pPDH expression

|         |         |             |         |         |             |
|---------|---------|-------------|---------|---------|-------------|
| Exc SAL | Inh SAL | p = 0.032 ↑ | Exc IBU | Inh SAL | p = 0.01 ↑  |
| Exc SAL | Inh IBU | p = 0.005 ↑ | Exc IBU | Inh IBU | p = 0.001 ↑ |

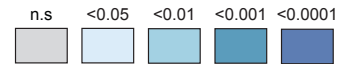

2803  
2804

2805 **Figure S6: Striosomal inhibition decreased cFos and increased pPDH expression,**  
2806 **excitation produced the opposite effect.**

2807 **(A-D)** Representative images illustrating DREADD expression and experimental manipulations.  
2808 Sections were stained for MOR, DREADD reporter (h4MD(Gi)-HA for inhibitory virus and  
2809 h3MD(Gq)-mCherry for excitatory virus), cFos, pPDH, and NT. Inhibitory manipulations increased  
2810 pPDH expression and reduced cFos, while excitatory manipulations increased cFos and  
2811 reproduced effects of IBU. **(A)** Cre+ IBU cFos expression in the absence of CNO. **(B)** Inhibitory  
2812 DREADD groups (Inh IBU and Inh SAL). **(C)** Excitatory DREADD groups (Exc SAL and Exc IBU).  
2813 **(D)** CNO SAL control. **(E-I)** Striosomal manipulation altered pPDH expression in striosomes  
2814 (rats=6-7/group, ANOVA,  $p < 0.0001$ ). **(F)** Striosomal inhibition increased pPDH expression  
2815 regardless of SAL or IBU treatment, indicating reduced striosomal activity. **(G)** In contrast,  
2816 excitatory manipulations did not significantly alter pPDH expression relative to SAL or IBU  
2817 controls. **(H)** CNO SAL and SAL groups did not differ in pPDH expression, indicating no detectable  
2818 effect of CNO alone. **(I)** Inhibitory and excitatory manipulations produced significantly different  
2819 pPDH levels. Mean  $\pm$  SEM. For additional statistical analyses, see table S3.

2820

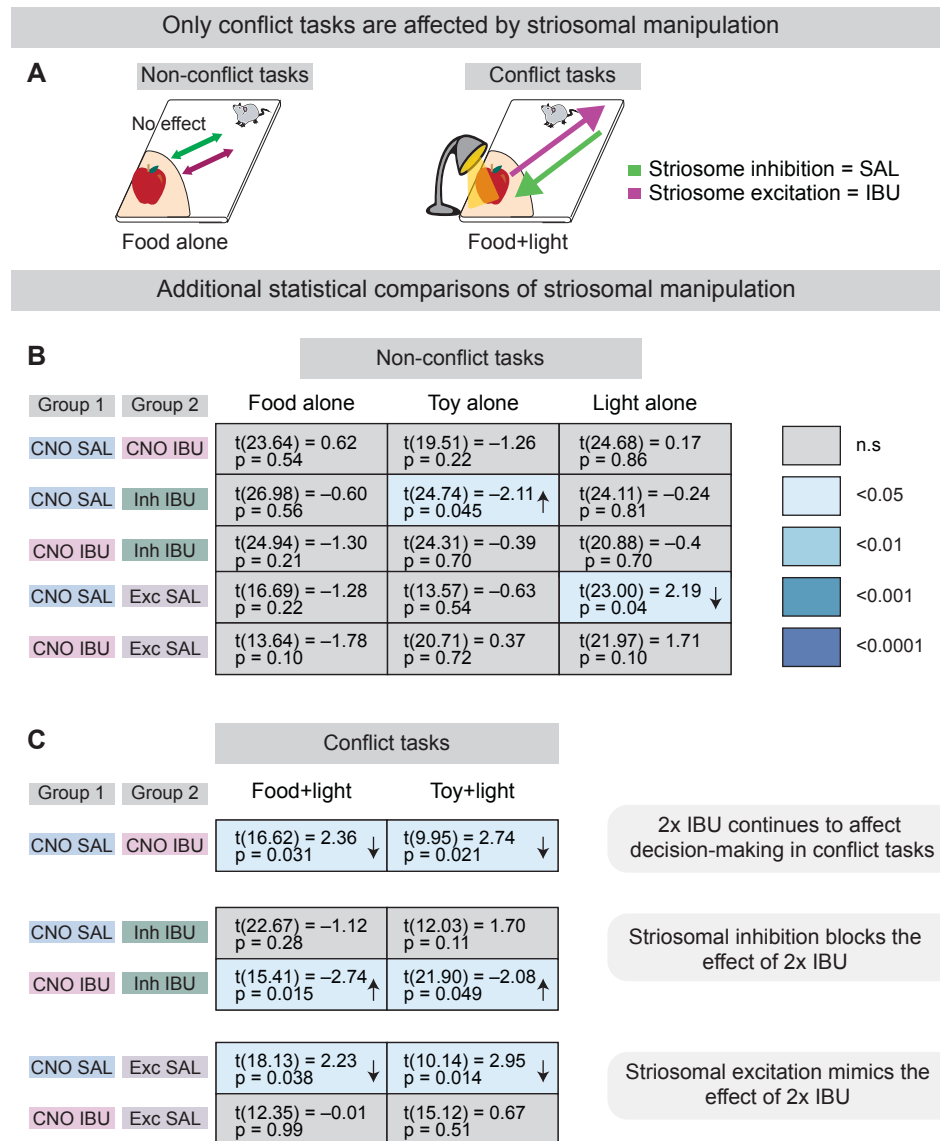

2821  
2822  
2823  
2824  
2825  
2826  
2827  
2828  
2829  
2830  
2831

**Figure S7: Striosomal inhibition blocks the behavioral effects of 2x IBU during conflict tasks, while striosomal excitation mimics the effects.**

**(A)** Summary diagram of behavioral effects of striosomal inhibition and excitation across non-conflict and conflict tasks. **(B-C)** Individual comparisons of raw behavioral scores across experimental groups during non-conflict **(B)** and conflict **(C)** tasks. Consistent with the normalized analyses presented in **Fig. 4D-E**, striosomal inhibition shifted performance toward CNO SAL-like levels, while excitation reproduced the effects of 2x IBU during conflict tasks, with minimal effects during non-conflict tasks. For additional statistical analyses, see table S3.

Detailed information for each group manipulation

| Name         |      |                           |      |                           | Inhibitory |           |           | Excitatory |           |
|--------------|------|---------------------------|------|---------------------------|------------|-----------|-----------|------------|-----------|
|              | SAL  | CNO SAL                   | IBU  | CNO IBU                   | Cre+ IBU   | Inh IBU   | Inh SAL   | Exc SAL    | Exc IBU   |
| Strain       | WT   | WT                        | WT   | WT                        | Oprm1-Cre  | Oprm1-Cre | Oprm1-Cre | Oprm1-Cre  | Oprm1-Cre |
| DREADD virus | None | hM4D(Gi)<br>no expression | None | hM4D(Gi)<br>no expression | hM4D(Gi)   | hM4D(Gi)  | hM4D(Gi)  | hM3D(Gq)   | hM3D(Gq)  |
| CNO          | None | CNO                       | None | CNO                       | None       | CNO       | CNO       | CNO        | CNO       |
| Treatment    | SAL  | SAL                       | IBU  | IBU                       | IBU        | IBU       | SAL       | SAL        | IBU       |

Striosomal inhibition abolishes cFos in LHb and pPDH in daSNc, while striosomal excitation increase cFos in LHb and pPDH in daSNc

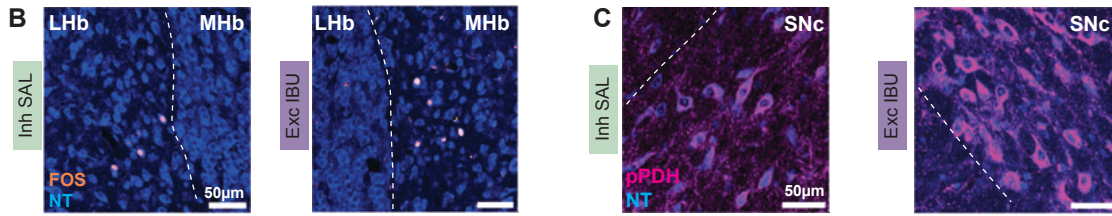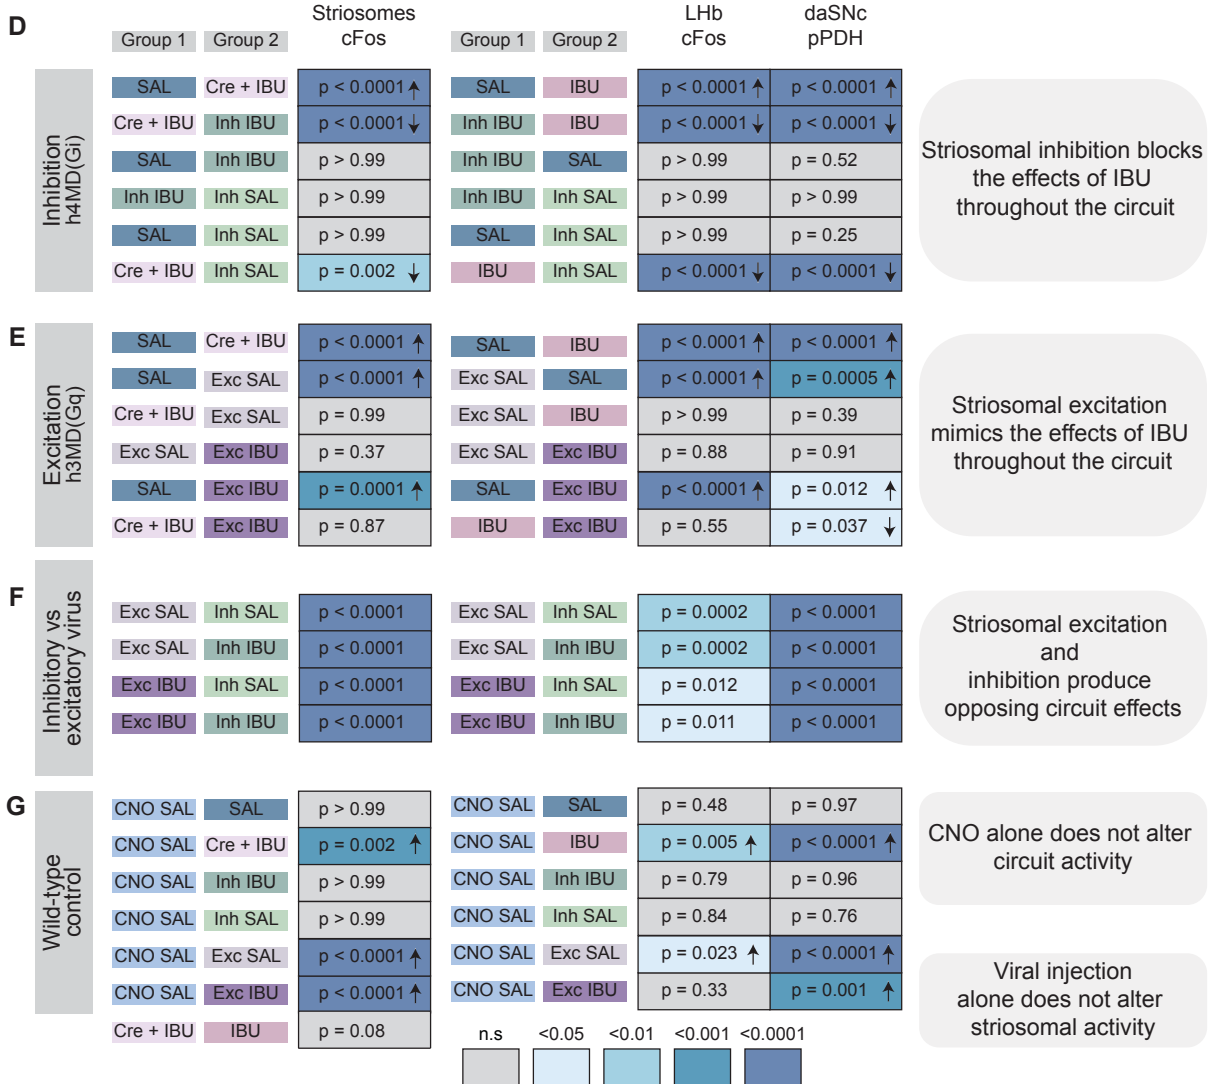

2833 **Figure S8: Striosomal manipulations regulate activity throughout the striosome-LHb-**  
2834 **daSNc circuit.**

2835 **(A)** Detailed overview of experimental and control groups used for post hoc comparison from **Fig.**  
2836 **4. (B)** LHb sections illustrating reduced cFos expression following striosomal inhibition (left; Inh  
2837 SAL) and excitation (right; Exc IBU). **(C)** daSNc sections following striosomal inhibition (left; Inh  
2838 SAL) or striosomal excitation (right; Exc IBU). **(D-G)** Post hoc comparisons corresponding to **Fig.**  
2839 **4C and Fig. 4F-G. (D)** Striosomal inhibition reduced cFos expression in both striosomes and LHb  
2840 and reduced pPDH expression in daSNc, regardless of SAL or IBU treatment, indicating that  
2841 circuit activity is determined by striosomal state rather than IBU exposure alone. **(E)** Striosomal  
2842 excitation increased cFos expression in striosomes and LHb and increased pPDH expression in  
2843 daSNc, independent of IBU treatment. **(F)** Inhibitory and excitatory manipulations produced  
2844 opposite effects throughout the circuit. **(G)** Control comparisons demonstrated no effect of CNO  
2845 alone, as CNO SAL and SAL groups did not differ in striosomal or LHb cFos or daSNc expression.  
2846 Similarly, Cre+IBU and IBU groups did not differ in striosomal cFos expression, indicating that  
2847 viral expression and surgical procedures did not alter striosomal response to IBU. Mean  $\pm$  SEM.  
2848 For additional statistical analyses, see table S3.

2849

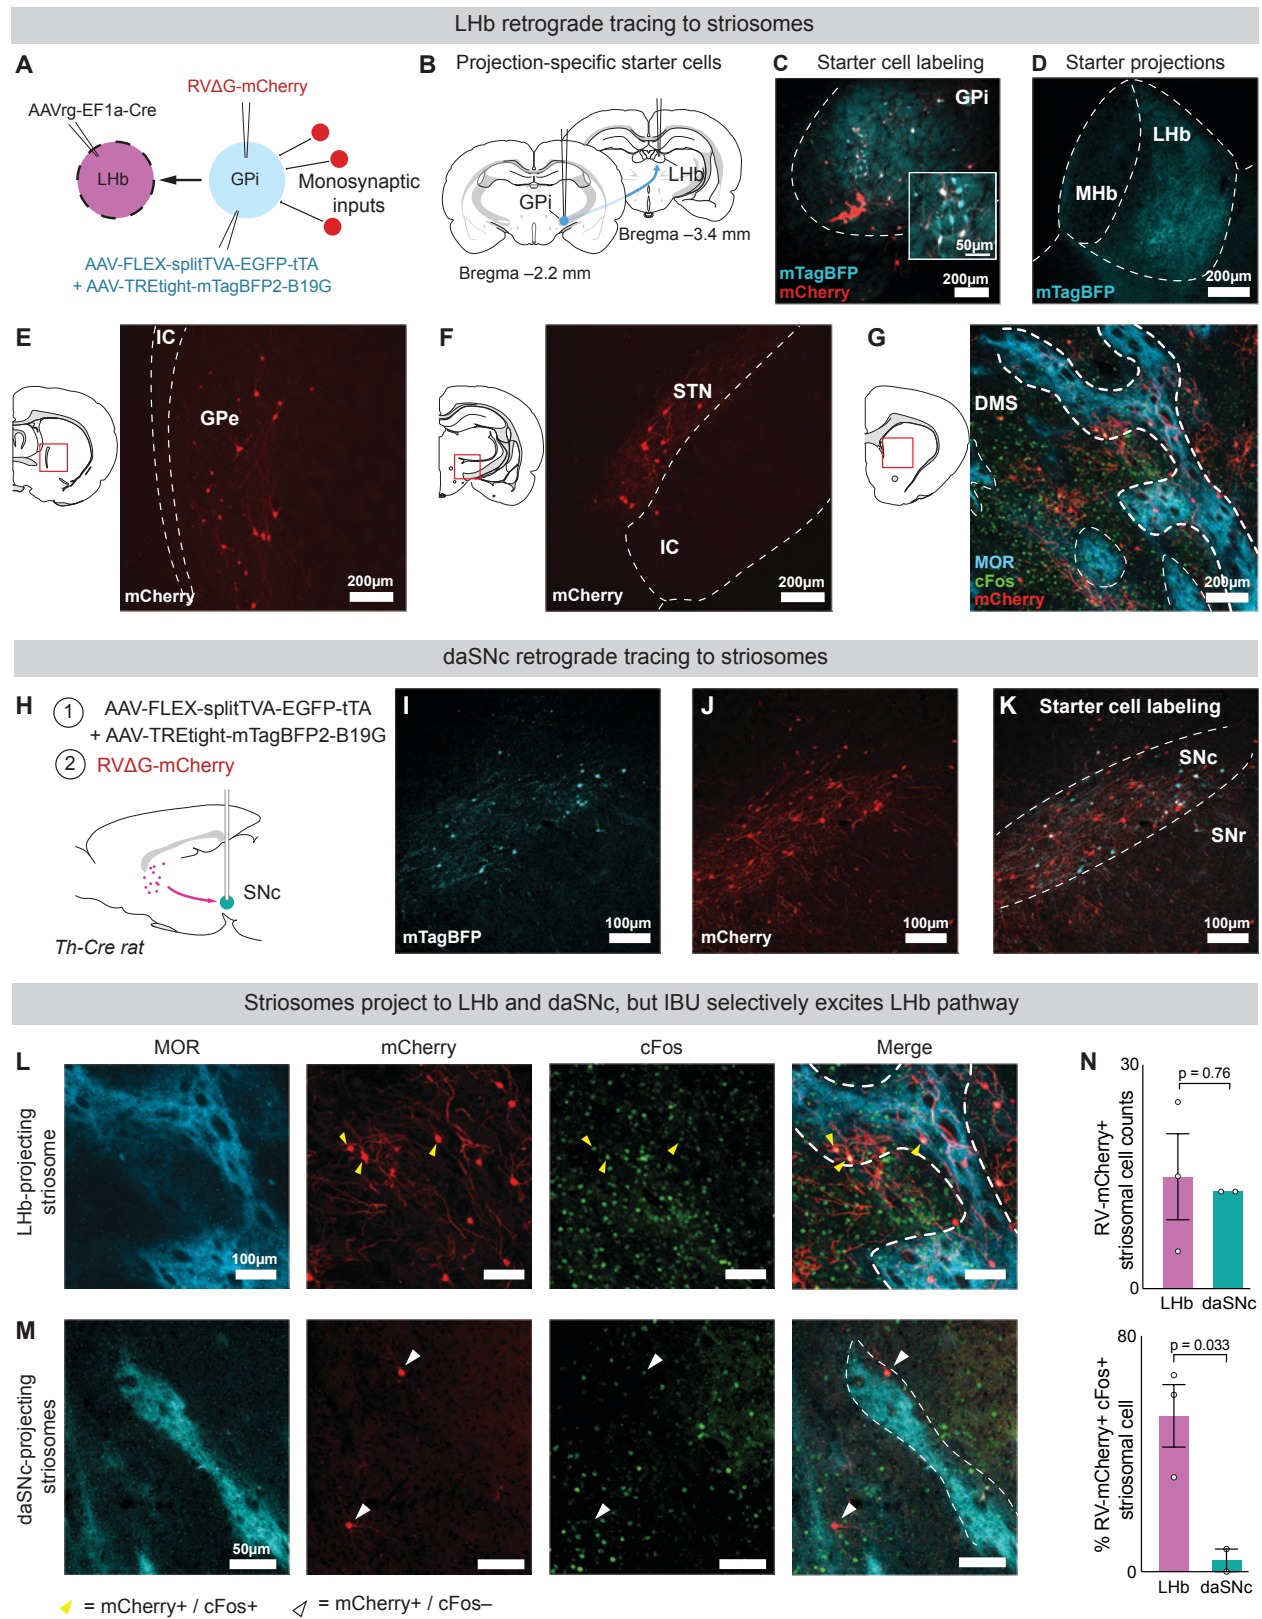

2850

2851

2852 **Figure S9: GHSR stimulation activates striosomal inputs to LHb-projecting GPi neurons,**  
2853 **but not to daSNC.**

2854 **(A-G)** Rabies-assisted monosynaptic retrograde tracing of LHb-projecting GPi neurons. **(A)**  
2855 Experimental schematic; see Materials and Methods section 7 for details. **(B)** Diagram illustrating  
2856 projection-defined starter cells and their location within the GPi **(C)**. **(D)** Anterogradely labeled  
2857 axon terminals from starter cells were observed in LHb. Retrograde mCherry labeling was  
2858 detected in GPe **(E)**, STN **(F)**, and DMS **(G)**. **(H-K)** Monosynaptic retrograde tracing from daSnc  
2859 neurons. **(H)** Experimental schematic. Starter cells were localized within daSnc and identified by  
2860 mTagBFP expression **(I)**, RV-mCherry labeling **(J)**, and merged signal **(K)**. Dashed lines indicate  
2861 SNc boundaries. **(L-N)** Following 1x IBU administration, DMS sections were stained for MOR,  
2862 mCherry, and cFos to assess IBU-induced activation of pathway-defined striosomal neurons.  
2863 LHb-projecting striosomal neurons are shown in **(L)**, and daSnc-projecting striosomal neurons  
2864 are shown in **(M)**. Yellow arrowheads indicate mCherry+/cFos+ neurons; white arrowheads  
2865 indicate mCherry+/cFos- neurons. **(N)** Similar numbers of RV-mCherry+ striosomal neurons were  
2866 observed in GPi→LHb and daSnc tracing experiments (**top**; rats=2–3/group; t-test, p=0.76).  
2867 However, 1x IBU induced a significantly greater proportion of mCherry+/cFos+ neurons in the  
2868 GPi→LHb pathway compared with the daSnc pathway (**bottom**; p=0.033), indicating preferential  
2869 recruitment of LHb-projecting striosomal circuits following GHSR activation. Mean ± SEM.

2870

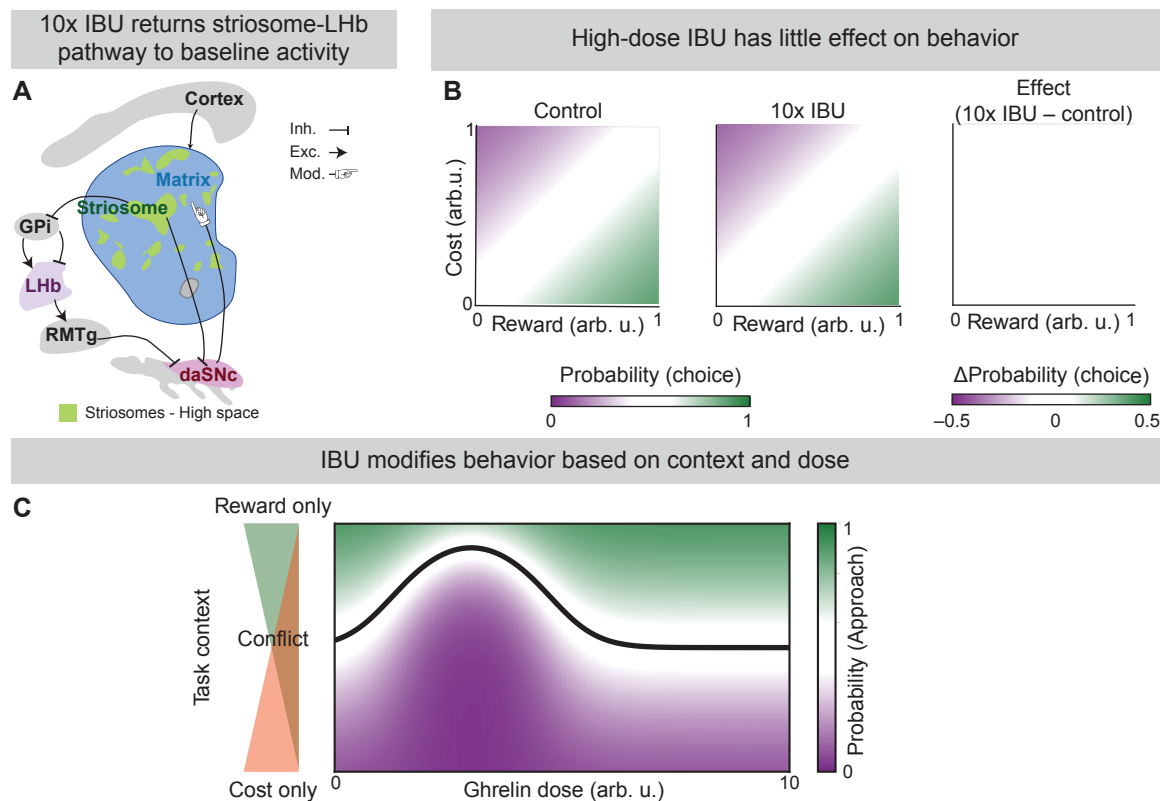

2871

2872

2873 **Fig. S10: High-dose ghrelin reversed striosome→LHb activation and restores baseline**  
 2874 **decision-making.**

2875 **(A)** Model schematic illustrating how high-dose IBU (10x) fails to recruit the striosome→LHb  
 2876 pathway, maintaining circuit activity near baseline levels. **(B)** Model predictions of approach/avoid  
 2877 behavior across reward–cost space following 10x IBU administration. Purple indicates avoidance  
 2878 and green indicates approach. **Left:** baseline (no IBU). **Middle:** 10x IBU condition. **Right:**  
 2879 difference map (baseline minus 10x IBU); white region indicates little to no change in choice  
 2880 probability ( $\Delta p(\text{choice})=0$ ). In contrast to the 2x IBU condition shown in **Fig. 5E**, high-dose IBU  
 2881 produces minimal changes in decision boundaries because circuit is operating near or at baseline  
 2882 activity. **(C)** Phase diagram of the model's approach probability as a function of IBU dosage (x-  
 2883 axis) and task context (y-axis), where 0=cost-only, 0.5=conflict, 1=reward-only. The black contour  
 2884 marks the points at which approach/avoidance becomes greater/less than 50%. This illustrates  
 2885 how IBU guides changes in behavior in a dose-dependent and task-dependent manner. For  
 2886 model details see Context- and task-dependent effects on approach/avoid, section 8.3 of  
 2887 materials and methods.

2888

IBU caused rats to choose direct paths across all 5 tasks

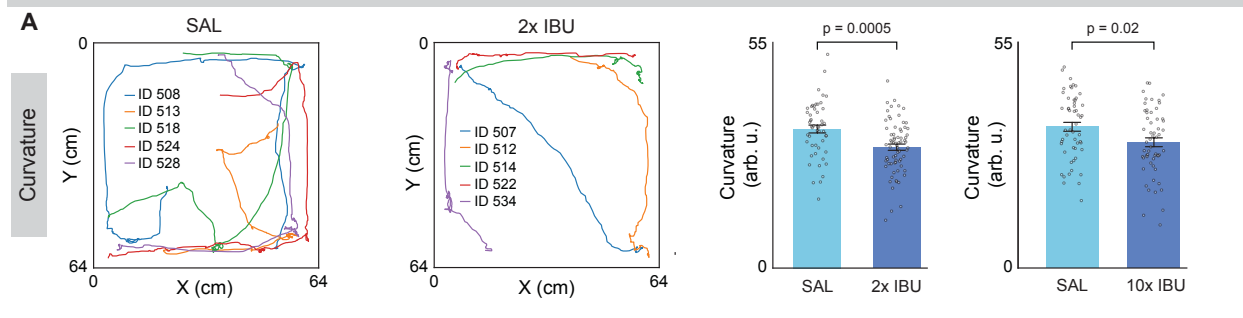

2X IBU caused decreased velocity across all 5 tasks

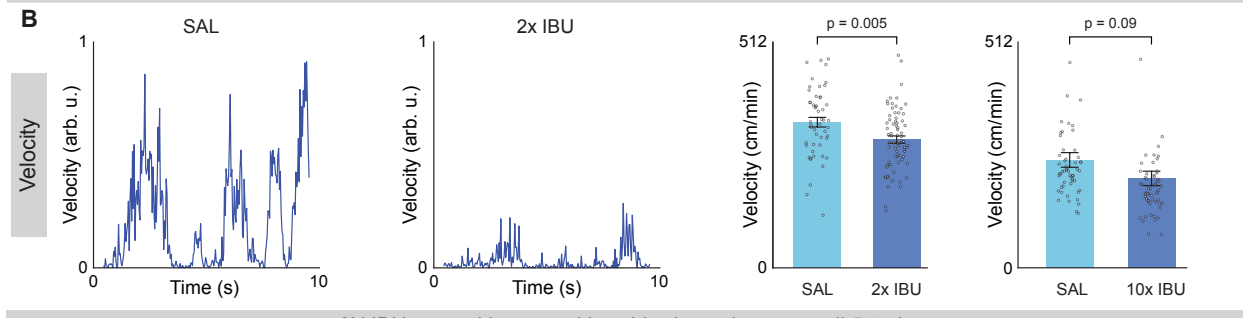

2X IBU caused increased head-body angle across all 5 tasks

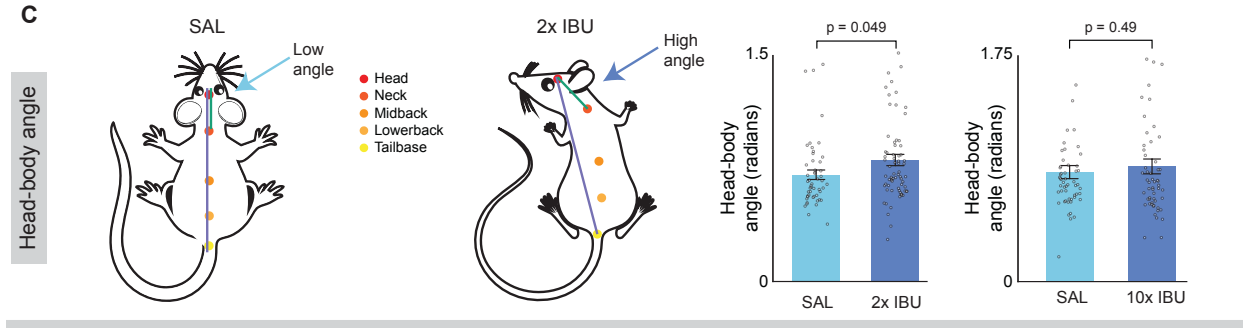

Summary of behavioral feature comparisons between SAL and IBU treatment groups

**D** 2X IBU

|             |                                           |                        |                      |
|-------------|-------------------------------------------|------------------------|----------------------|
| Combined    | $p = 0.0005 \downarrow$                   | $p = 0.005 \downarrow$ | $p = 0.049 \uparrow$ |
| Food alone  | SAL = 7, IBU = 16 $p = 0.07$              | $p = 0.12 \downarrow$  | $p = 0.06 \uparrow$  |
| Toy alone   | SAL = 7, IBU = 14 $p = 0.019 \downarrow$  | $p = 0.07 \downarrow$  | $p = 0.18$           |
| Light alone | SAL = 14, IBU = 14 $p = 0.046 \downarrow$ | $p = 0.14 \downarrow$  | $p = 0.58$           |
| Food+light  | SAL = 13, IBU = 13 $p = 0.55$             | $p = 0.44$             | $p = 0.96$           |
| Toy+light   | SAL = 10, IBU = 14 $p = 0.009 \downarrow$ | $p = 0.003 \downarrow$ | $p = 0.15$           |
|             | Curvature                                 | Velocity               | Head-body angle      |

**E** 10x IBU

|                   |                        |                        |                 |
|-------------------|------------------------|------------------------|-----------------|
|                   | $p = 0.02 \downarrow$  | $p = 0.09 \downarrow$  | $p = 0.49$      |
| SAL = 9, IBU = 10 | $p = 0.011 \downarrow$ | $p = 0.002 \downarrow$ | $p = 0.35$      |
| SAL = 9, IBU = 10 | $p = 0.43$             | $p = 0.09 \downarrow$  | $p = 0.85$      |
| SAL = 9, IBU = 7  | $p = 0.99$             | $p = 0.97$             | $p = 0.85$      |
| SAL = 9, IBU = 10 | $p = 0.59$             | $p = 0.11 \downarrow$  | $p = 0.72$      |
| SAL = 9, IBU = 10 | $p = 0.026 \downarrow$ | $p = 0.54$             | $p = 0.33$      |
|                   | Curvature              | Velocity               | Head-body angle |

n.s. <0.05 <0.01 <0.001 <0.0001

2889  
2890

2891 **Figure S11: IBU administration alters movement features during task performance.**  
2892 Motor features were extracted from pose-estimation data collected during tasks (section 9,  
2893 Materials and Methods). Comparisons were performed between SAL and 2x (rats=7-16/group)  
2894 and between SAL and 10x IBU (rats=7-10/group). **(A)** Example trajectories from SAL and 2x IBU-  
2895 treated rats. Relative to SAL, IBU reduced trajectory curvature (2x IBU:  $p=0.0005$ ; 10x IBU,  
2896  $p=0.02$ ). **(B)** Example velocity traces from SAL and 2x IBU-treated rats. 2x IBU reduced velocity  
2897 ( $p=0.005$ ), whereas 10x IBU did not ( $p=0.09$ ). These dose-dependent changes mirror alterations  
2898 in daSNc pPDH expression, with increased pPDH observed following 2x IBU but not 10x IBU. **(C)**  
2899 Head-body angle, defined as the difference between the head-vector (green) and body-axis  
2900 (purple), was increased following 2x IBU ( $p=0.049$ ) but not 10x IBU ( $p=0.49$ ). **(G-H)** Motor features  
2901 were analyzed across individual tasks. Arrows indicate nominal trends ( $p<0.15$ ). Following 2x IBU  
2902 **(G)**, curvature and velocity were generally reduced, whereas head-body angle was increased,  
2903 consistent with the GHSR-mediated striosomal hyperactivity and daSNc inactivity (**Fig. 2C, M**). In  
2904 contrast, 10x IBU **(H)** produced limited effects, with changes primarily observed during the Food-  
2905 alone task, consistent with increased food consumption. Mean  $\pm$  SEM. For additional statistical  
2906 analyses, see table S3. Icons were generated using Adobe Illustrator generative tool.  
2907

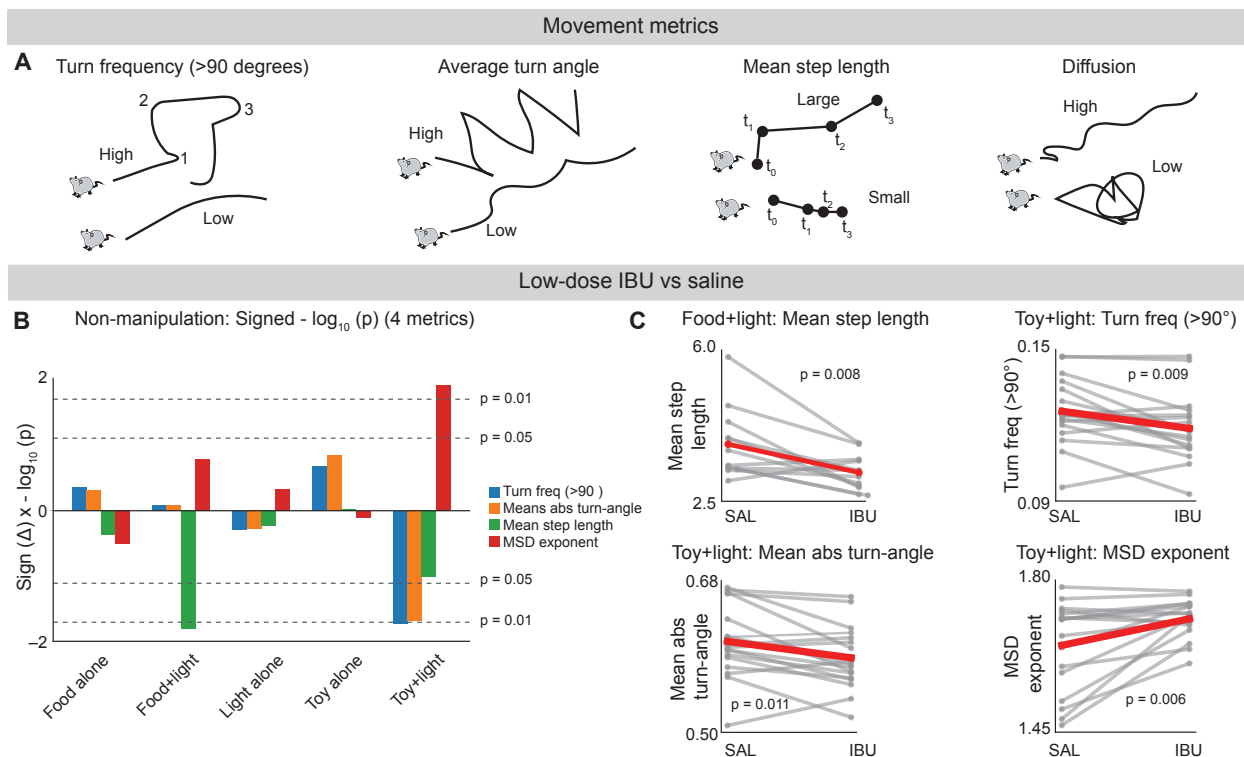

2908

2909

2910

**Figure S12: IBU alters movement patterns in a task-dependent manner.**

2911 **(A)** Four additional movement features were quantified during behavior tasks, including the  
 2912 frequency of turns greater than 90 degrees, average turn angle (angle between 0.2 second),  
 2913 mean step length, and diffusion measured from the relationship between mean squared  
 2914 displacement and time (see Materials and Methods section 9.6). **(B-C)** Comparison of movement  
 2915 features across behavioral tasks (rats=12-17/groups). **(B)** The y-axis represents the significance  
 2916 of SAL versus IBU differences, with positive values indicating greater scores in IBU-treated rats  
 2917 and negative values indicating greater scores in SAL-treated rats, dashed lines indicate p-value  
 2918 thresholds (t-test). IBU-induced changes in movement were strongly task-dependent, with the  
 2919 largest effects observed during conflict tasks ( $p < 0.05$ ). In contrast to **fig. S11**, where all tasks  
 2920 were impacted in significant or non-significant way. **(C)** Paired line plots showing individual animal  
 2921 differences for the four movement features exhibiting the strongest task-dependent effects  
 2922 identified in panel B (t-test,  $p < 0.01$ ). For additional statistical analyses, see table S3.

2923



Biotinylated ghrelin localization in DLS striosomes

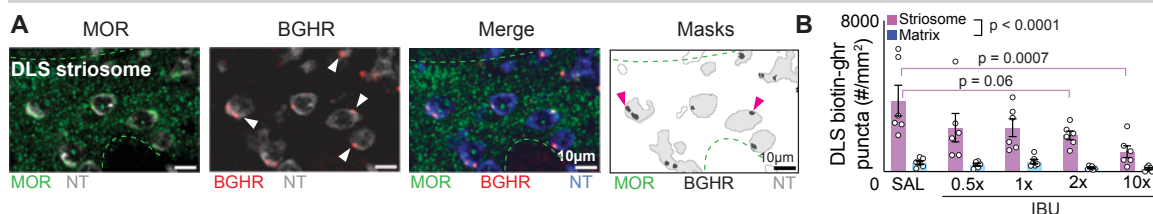

GHSR modulates activity in DMS and inactivity in DLS striosomes

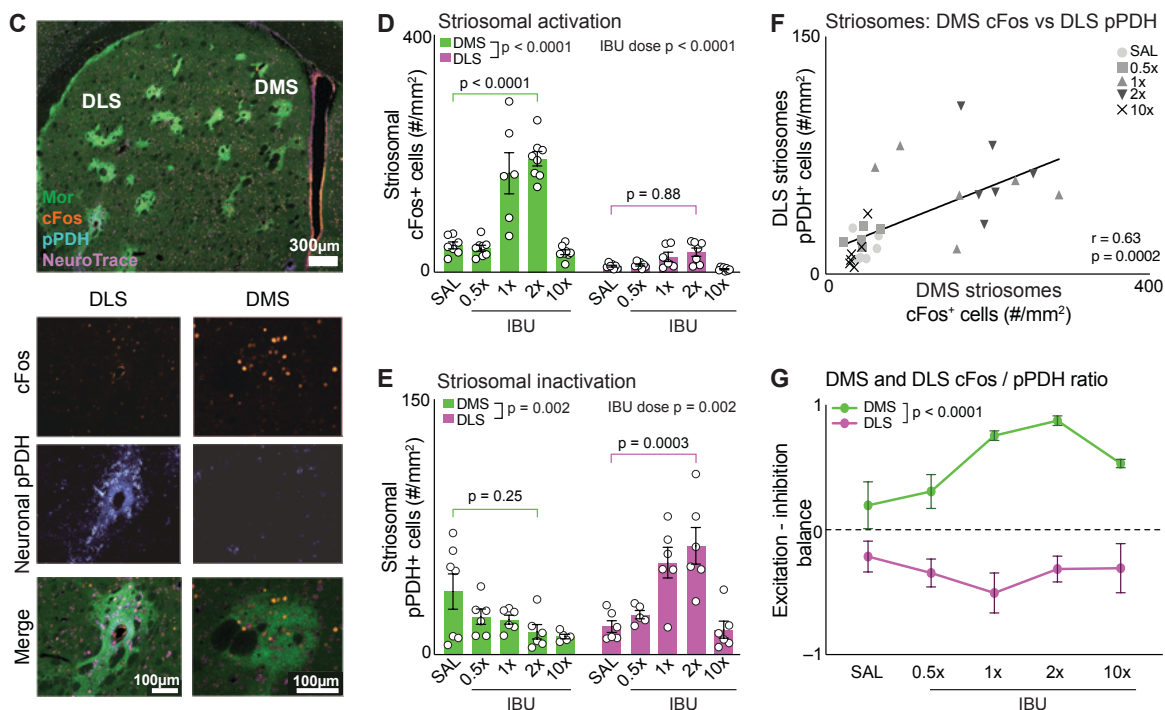

There is no effect of IBU on cFos or pPDH expression in matrix in DMS or DLS

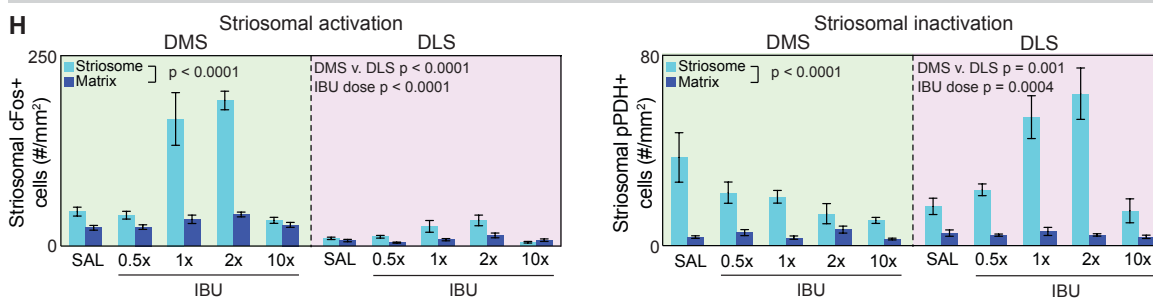

Computational model of dose dependent GHSR modulation of DMS / DLS

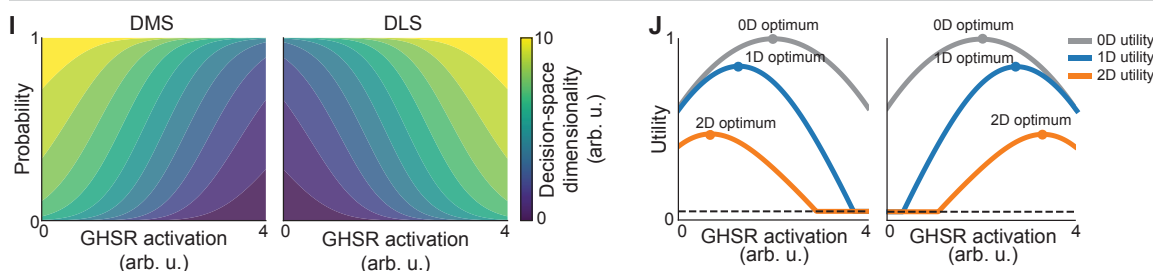

2941 **Figure S14: GHSR activation increase cFos in DMS and pPDH in DLS striosomes.**  
2942 **(A-B)** Similar to DMS, BGHR selectively labeled DLS striosomes **(A)** relative to matrix and  
2943 decreased with increasing IBU dose **(B, rats=6/group, ANOVA, striosomes vs matrix,  $p<0.0001$ ;**  
2944 **dose  $p=0.009$ ).** **(C-G)** IBU produced opposing effects across DMS and DLS striosomes **(C,**  
2945 **rats=5-8/group).** IBU increased cFos expression in DMS but not DLS striosomes **(D,  $p<0.0001$ ),**  
2946 **while increasing pPDH in DLS but not DMS striosomes (E,  $p=0.002$ ; SAL vs 2x IBU in DLS**  
2947  **$p=0.0003$ ).** **(F)** DMS striosomal activity correlated with DLS inactivity across IBU doses ( $r=0.63,$   
2948  $p=0.0002$ ). **(G)** Excitation-inhibition balance shifted toward excitation in DMS and inhibition in DLS  
2949 ( $p<0.0001$ ). **(H)** No significant effects of IBU were observed in matrix compartments, indicating  
2950 striosome-specific responses **(left, activity,  $p<0.0001$ ; right, inactivity,  $p<0.0001$ ).** **(I-J)** Model  
2951 illustrating how opposing DMS and DLS striosomal states may differentially regulate parallel  
2952 decision-spaces (see Materials and Methods sections 8); showing DMS **(left, where it reduces**  
2953 **the decision-space size) and DLS (right, where it increases the decision-space size).** **(J)**  
2954 Increased GHSR activation is predicted to preferentially influence high-dimensional decisions  
2955 while minimally affecting simple choices. In the simulation, “utility” is calculated from the “optimal”  
2956 striosomal activity for a decision (given its required decision-space), given GHSR activation.  
2957 Mean  $\pm$  SEM. Additional statistics see table S3.  
2958

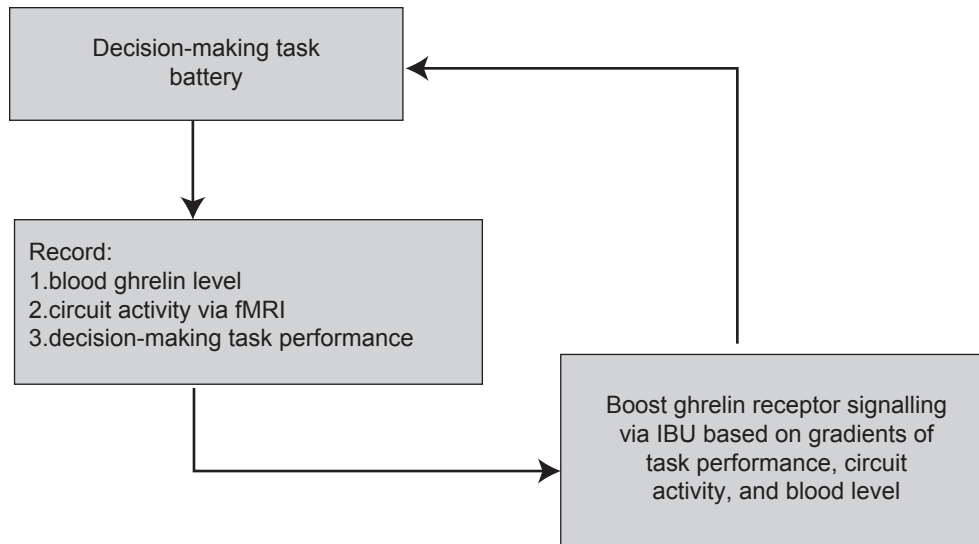

2959

2960

2961 **Figure S15: Bioinformed GHSR-based pharmacotherapy framework for treatment of SUD**  
 2962 **and PTSD.**

2963 Flow chart demonstrates potential personalized treatment strategy for substance use disorder  
 2964 (SUD) and post-traumatic stress disorder (PTSD). For each subject, blood ghrelin levels,  
 2965 decision-making performance, and striosomal circuit activity will be assessed. GHSR signaling  
 2966 can then be modulated based on behavioral performance and the striosomal circuit activity, with  
 2967 the goal of “normalizing” the circuit and improving decision-making behaviors.

2968

2969 **13 TABLES**2970 **13.1 Table S1: Abbreviations**

| Abbreviations | Full name                                                  |
|---------------|------------------------------------------------------------|
| GHSR          | growth hormone secretagogue receptor                       |
| daSNc         | dopaminergic neurons of the substantia nigra pars compacta |
| GPI           | Globus Pallidus internus                                   |
| LHb           | Lateral habenula                                           |
| RMTg          | rostral medial tegmental nucleus                           |
| pPDH          | phosphorylated pyruvate dehydrogenase                      |
| DMS           | dorsomedial striatum                                       |
| Oprm1-cre     | Opioid Receptor Mu 1 - Cre                                 |
| IBU           | ibutamoren mesylate                                        |
| SAL           | Saline                                                     |
| IP            | Intraperitoneal                                            |
| BGHR          | biotinylated acyl-ghrelin                                  |
| ARC           | Arcuate hypothalamic nucleus                               |
| MOR           | Mu opioid receptor                                         |
| AAV           | Adeno-Associated Virus                                     |
| GCaMP7f       | Genetically encoded calcium indicator                      |
| aGHR          | acyl-ghrelin                                               |
| DREADD        | Designer Receptors Exclusively Activated by Designer Drugs |
| CNO           | clozapine-N-oxide                                          |
| TRIO          | Tracing Relationship between Input and Output              |
| TH            | Tyrosine Hydroxylase                                       |
| RV            | Retrovirus                                                 |

|          |                                                                    |
|----------|--------------------------------------------------------------------|
| Exc. SAL | Excitatory Oprm1-cre group (hM3D(Gq)) injected with CNO and Saline |
| Exc. IBU | Excitatory Oprm1-cre group (hM3D(Gq)) injected with CNO and 2x IBU |
| Inh. SAL | Inhibitory Oprm1-cre group (hM4D(Gi)) injected with CNO and saline |
| Inh. IBU | Inhibitory Oprm1-cre group (hM4D(Gi)) injected with CNO and 2x IBU |
| WT SAL   | Wild-type Oprm1-cre group (hM4D(Gi)) injected with CNO and saline  |
| WT IBU   | Wild-type Oprm1-cre group (hM4D(Gi)) injected with CNO and 2X IBU  |
| DLS      | Dorsolateral striatum                                              |

2971  
2972

## 2973 13.2 Table S2: Reagents

| REAGENT RESOURCE                                                     | SOURCE                    | IDENTIFIER  |
|----------------------------------------------------------------------|---------------------------|-------------|
| <b>Antibodies</b>                                                    |                           |             |
| <b>Primary Antibodies</b>                                            |                           |             |
| Monoclonal mouse anti-cFos (C-10)                                    | Santa Cruz                | sc-271243   |
| Polyclonal rabbit anti-MOR1                                          | ImmunoStar                | 24216       |
| anti-Mu Opioid Receptor antibody (UMB3) C-terminal Rabbit            | Abcam                     | ab134054    |
| Polyclonal guinea pig anti-MOR1                                      | Millipore Sigma           | AB5509      |
| Monoclonal rabbit anti-phospho-pyruvate dehydrogenase alpha1(Ser293) | Cell signaling technology | E4V9L       |
| Polyclonal rabbit Anti-Ghrelin Receptor (GHSR) (extracellular)       | Alomone labs              | AGR-031     |
| Sheep anti-Tyrosine Hydroxylase                                      | GeneTex                   | GTX82570    |
| Ghrelin, human, Biotin-labeled                                       | AnaSpec                   | AS-29391    |
| Goat anti-HA Tag                                                     | Novus Biologicals         | NB600-362   |
| Chicken Anti-Green Fluorescent Protein (GFP)                         | Aves Labs                 | GFP1020     |
| <b>Secondary Antibodies</b>                                          |                           |             |
| Donkey anti-guinea pig, Alexa Fluor™ 488                             | Jackson ImmunoResearch    | 706-545-148 |

|                                            |                        |             |
|--------------------------------------------|------------------------|-------------|
| Donkey anti- guinea pig, Alexa Fluor™ 555  | Jackson ImmunoResearch | 706-565-148 |
| Donkey anti- mouse, Alexa Fluor™ 555       | Jackson ImmunoResearch | 715-565-151 |
| Donkey anti- mouse, Alexa Fluor™ 594       | Invitrogen             | R37115      |
| Donkey anti- mouse, Alexa Fluor™ 647       | Jackson ImmunoResearch | 715-605-151 |
| Donkey anti- mouse, Alexa Fluor™ 488       | Jackson ImmunoResearch | 715-545-151 |
| Donkey anti- rabbit, Alexa Fluor™ 647      | Jackson ImmunoResearch | 711-605-152 |
| Donkey anti- sheep, Alexa Fluor™ 488       | Jackson ImmunoResearch | 713-545-003 |
| Donkey anti- goat, Alexa Fluor™ 488        | Jackson ImmunoResearch | 705-545-147 |
| Alexa Fluor™ 594-Streptavidin              | Jackson ImmunoResearch | 016-580-084 |
| Donkey anti- chicken IgY, Alexa Fluor™ 488 | Jackson ImmunoResearch | 703-545-155 |
| NeuroTrace™ 435/455 Blue Fluorescent Stain | Invitrogen             | N21479      |
| <b>Other reagents</b>                      |                        |             |
| Ibutamoren (IBU)                           | Medchem                | HY-50844    |
| Clozapine N-oxide (CNO)                    | Medchem                | HY-17366    |
| GLP-1 (7-36) amide                         | Bachem                 | 4030663     |
| DMSO                                       | Sigma                  | D8418       |
| Isoflurane                                 | MWI                    | 502017      |

|                                              |                                 |           |
|----------------------------------------------|---------------------------------|-----------|
| 0.9% sterile saline                          | MWI                             | 510223    |
| Enrosite Enroflox 2.27%                      | MWI                             | 502017    |
| Ostiox 5mg/ml                                | MWI                             | 501080    |
| ketamine 100mg/ml                            | MWI                             | 501072    |
| Revertidine (Atipamezole)                    | MWI                             | 503012    |
| Optixcare eye lube                           | MWI                             | 065441    |
| Lactated Ringer                              | MWI                             | 501033    |
| Bupivacaine 0.5%                             | MWI                             | 65627     |
| Metabond quick base                          | Patterson Dental<br>Company C&B | 75533492  |
| Metabond gold quick catalyst                 | Patterson Dental<br>Company C&B | 75533500  |
| Metabond tooth powder                        | Patterson Dental<br>Company C&B | 75533559  |
| Ortho Jet liquid resin                       | Patterson Dental<br>Company C&B | 4594750   |
| silicone elastomer (Kwik-Sil™)               | World Precision<br>Instruments  | KWIK-SIL  |
| Hamilton 70 microliter syringes: Termination | Hamilton                        | 80383     |
| TBS                                          | VWR                             | 76371-738 |
| PBS                                          | VWR                             | 76371-734 |
| Triton-x 100                                 | Sigma                           | T8787     |
| Donkey Serum                                 | Sigma                           | s30-100mL |

|                                                  |                                    |                                                    |
|--------------------------------------------------|------------------------------------|----------------------------------------------------|
| Biotin Blocking Kit                              | Fisher Thermo labs                 | e21390                                             |
| Glass slides                                     | Fisher Scientific                  | 22-034486                                          |
| Coverslips                                       | VWR                                | 16004-312                                          |
| Dapi-Fluoromount-G                               | Electron Microscopy Sciences       | 17984-24                                           |
| Fluoromount-G                                    | Electron Microscopy Sciences       | 7984-25                                            |
| Teklad Global Irradiated 18% protein rodent diet | Laboratory Animal Resources Center |                                                    |
| <b>Bacterial and Virus Strains</b>               |                                    |                                                    |
| pGP-AAV-syn-FLEX-jGCaMP7f-WPRE (AAV8)            | AddGene                            | 104492-AAV8                                        |
| hSyn-DIO-hM3D(Gq)-mCherry (AAV8)                 | AddGene                            | 50454-AAV8                                         |
| pAAV-hSyn-DIO-HA-hM4D(Gi)-IRES-mCitrine (AAV8)   | AddGene                            | 50455-AAV8                                         |
| pAAV-EF1a-Cre                                    | AddGene                            | 55636-AAVrg                                        |
| TREtight-mTagBFP2-B19G                           | AddGene                            | 100799-AAV1                                        |
| AAV1-syn-FLEX-splitTVA-EGFP-tTA                  | Addgene                            | 100798-AAV1                                        |
| RVΔG-mCherry                                     | Dr.Wickersham Lab                  |                                                    |
| <b>Experimental models: Organisms</b>            |                                    |                                                    |
| Rat: Oprm1-Cre knock-in                          | Bossert et al. <sup>29</sup>       | SD-Tg(Oprm1-icre) 1Ottc (RGD#155641245) (RRRC#975) |
| Th-Cre Long-Evans                                | NIH NIDA                           | N/A                                                |

|                                             |                               |                                                                                                                                             |
|---------------------------------------------|-------------------------------|---------------------------------------------------------------------------------------------------------------------------------------------|
| Rat Long-Evans                              | Envigo                        | Strain (RRC#)                                                                                                                               |
| Rat Sprague Dawley                          | Charles River<br>Laboratories | #001                                                                                                                                        |
| <b>Other</b>                                |                               |                                                                                                                                             |
| Confocal Zeiss LSM 900                      | Ziess                         | N/A                                                                                                                                         |
| ProView Integrated Lens 1.0mm x 9.0mm       | Inscopix                      | 1050-004416                                                                                                                                 |
| Baseplate cover                             | Inscopix                      | 1050-004639                                                                                                                                 |
| Olympus VS200 slide scanner                 | Olympus                       | N/A                                                                                                                                         |
| <b>Software and hardware and algorithms</b> |                               |                                                                                                                                             |
| Autodesk Fusion 360 2022 or later           | Autodesk                      | <a href="https://www.autodesk.com/products/fusion-360/personal">https://www.autodesk.com/products/fusion-360/personal</a>                   |
| MATLAB R2024a                               | Mathworks                     | <a href="https://www.mathworks.com/products/matlab.html">https://www.mathworks.com/products/matlab.html</a>                                 |
| PuTTY 0.76 or later                         | PuTTY                         | <a href="https://www.chiark.greenend.org.uk/~sgtatham/putty/latest.html">https://www.chiark.greenend.org.uk/~sgtatham/putty/latest.html</a> |
| Ethovision XT16                             | Noldus                        | <a href="https://www.noldus.com/ethovision-xt">https://www.noldus.com/ethovision-xt</a>                                                     |
| Basler acA1300-60                           | Basler GenICam                |                                                                                                                                             |
| Bonsai                                      | Open Ephys                    | <a href="https://bonsai-rx.org/">https://bonsai-rx.org/</a>                                                                                 |
| ImageJ 1.53K                                | NIH                           | <a href="https://imagej.net/ij/,1997-2024">https://imagej.net/ij/,1997-2024</a>                                                             |

2974  
2975

## 2976 13.3 Table S3: Detailed Statistical Analysis

| Figure                                                                                                  | Main Effect                                                                                                                                                                                                                                                                                                                                                                                                                                                                                                                                                                                                                                                                                                                                                                                                                                                                                                                                        | Post-hoc/ interpretation                                                                                                                                                                                                                                                                                                                                                                                                                                                                                                                                                                                                                                                                                                                                               |
|---------------------------------------------------------------------------------------------------------|----------------------------------------------------------------------------------------------------------------------------------------------------------------------------------------------------------------------------------------------------------------------------------------------------------------------------------------------------------------------------------------------------------------------------------------------------------------------------------------------------------------------------------------------------------------------------------------------------------------------------------------------------------------------------------------------------------------------------------------------------------------------------------------------------------------------------------------------------------------------------------------------------------------------------------------------------|------------------------------------------------------------------------------------------------------------------------------------------------------------------------------------------------------------------------------------------------------------------------------------------------------------------------------------------------------------------------------------------------------------------------------------------------------------------------------------------------------------------------------------------------------------------------------------------------------------------------------------------------------------------------------------------------------------------------------------------------------------------------|
| <b>Fig 1C, left</b><br>Effects of 2x IBU on non-conflict                                                | <b>Main effects:</b> To determine whether intermediate GHSR activation alters performance during simple non-conflict behavioral paradigms, behavioral performance was compared between SAL- and 2x IBU-treated rats across three non-conflict tasks: Food alone, Toy alone, and Light alone (rats = 25–26 per group). Because each behavioral tasks measured different baseline values and behavioral ranges, raw behavioral data were min-max normalized prior to cross-task comparisons. Group comparisons were analyzed using a two-way ANOVA followed by Tukey's multiple comparisons test. Analysis revealed no significant interaction between treatment and task ( $F=0.5698$ , $p=0.6504$ ), no significant main effect of IBU treatment ( $F=0.1328$ , $p=0.6545$ ), and no significant main effect of task ( $F=1.531$ , $p=0.3166$ ), indicating that 2x IBU did not alter performance across simple non-conflict behavioral conditions | <b>Post hoc comparisons:</b> Tukey's multiple comparisons test revealed no significant differences between SAL and 2x IBU conditions within any individual task (Food alone: $p=0.9984$ ; Toy alone: $p=0.9451$ ; Light alone: $p=0.9997$ ). Similarly, no differences were observed across behavioral tasks within either SAL- or IBU-treated groups (all $p > 0.72$ ). Together, these findings demonstrate that intermediate-dose GHSR activation does not alter performance during simple non-conflict behavioral paradigms, indicating that the behavioral effects of IBU are selective to tasks requiring conflict-based or higher-order decision-making processes.                                                                                              |
| <b>Fig. 1 C (right)</b><br>Effects of 2x IBU across conflict-based behavioral paradigms<br>Main effects | <b>Main effects:</b> To determine whether the behavioral effects of intermediate GHSR activation differed across conflict-based paradigms, entries into the reward zone were compared between Food+Light and Toy+Light tasks following SAL or 2x IBU administration. Because behavioral tasks differed in baseline values and behavioral ranges, raw behavioral data were min-max normalized prior to cross-task comparisons. Group comparisons were analyzed using a two-way ANOVA followed by Tukey's multiple comparisons test. Analysis revealed a significant main effect of IBU treatment ( $F(1,104) = 16.47$ , $p=0.000096$ ), while no significant main effect of task type was observed ( $F(1,104)=2.725$ , $p=0.1018$ ), indicating that behavioral changes were driven primarily by IBU treatment rather than differences between conflict paradigms                                                                                  | <b>Post hoc comparisons:</b> Tukey's multiple comparisons test revealed no differences between Food+Light and Toy+Light tasks under SAL conditions ( $p=0.4216$ ) or following 2x IBU administration ( $p=0.8594$ ). In contrast, both conflict paradigms showed significantly altered behavioral performance following 2x IBU administration relative to SAL controls (SAL Toy+Light vs IBU Food+Light, $p=0.00076$ ; SAL Toy+Light vs IBU Toy+Light, $p=0.0067$ ). Together, these findings demonstrate that intermediate-dose GHSR activation similarly alters behavior across distinct conflict-based paradigms, indicating that the behavioral effects of IBU are generalized across conflict-related decision-making conditions rather than being task specific. |
| <b>Fig 1D</b><br>Effects of 2x IBU on                                                                   | <b>Main effects:</b> To determine whether the behavioral effects of intermediate GHSR activation were selective to conflict-based decision-making paradigms, entries into the reward zone were compared between non-conflict tasks (Food alone,                                                                                                                                                                                                                                                                                                                                                                                                                                                                                                                                                                                                                                                                                                    | <b>Post hoc comparisons:</b> Tukey's multiple comparisons test revealed no differences between SAL and 2x IBU conditions during non-conflict tasks ( $p=0.9580$ ). In contrast, 2x IBU                                                                                                                                                                                                                                                                                                                                                                                                                                                                                                                                                                                 |

|                                                                                            |                                                                                                                                                                                                                                                                                                                                                                                                                                                                                                                                                                                                                                                                                                                                                                                                                                                                                                 |                                                                                                                                                                                                                                                                                                                                                                                                                                                                                                                                                                                                                                                         |
|--------------------------------------------------------------------------------------------|-------------------------------------------------------------------------------------------------------------------------------------------------------------------------------------------------------------------------------------------------------------------------------------------------------------------------------------------------------------------------------------------------------------------------------------------------------------------------------------------------------------------------------------------------------------------------------------------------------------------------------------------------------------------------------------------------------------------------------------------------------------------------------------------------------------------------------------------------------------------------------------------------|---------------------------------------------------------------------------------------------------------------------------------------------------------------------------------------------------------------------------------------------------------------------------------------------------------------------------------------------------------------------------------------------------------------------------------------------------------------------------------------------------------------------------------------------------------------------------------------------------------------------------------------------------------|
| conflict versus non-conflict                                                               | Toy alone, and Light alone; rats=77) and conflict-based tasks (Food-Light and Toy-Light; rats=52–56) following SAL or 2x IBU administration. Because behavioral tasks differed in baseline values and behavioral ranges, raw behavioral data were min-max normalized prior to cross-task comparisons. Group comparisons were analyzed using a two-way ANOVA followed by Tukey's multiple comparisons test. Analysis revealed a significant interaction between treatment and task type ( $F(1,258)=8.891$ , $p=0.0031$ ), a significant main effect of IBU treatment ( $F(1,258)=5.451$ , $p=0.0203$ ), and a significant main effect of task type ( $F(1,258)=14.30$ , $p=0.0002$ ), indicating that the behavioral effects of IBU differed between conflict and non-conflict paradigms.                                                                                                       | significantly altered performance during conflict-based tasks relative to both SAL non-conflict conditions ( $p=0.0001$ ) and SAL conflict conditions ( $p=0.0034$ ). Similarly, within the IBU-treated group, conflict tasks differed significantly from non-conflict tasks ( $p<0.0001$ ), whereas no differences were observed between SAL non-conflict and SAL conflict conditions ( $p=0.9440$ ). Together, these findings demonstrate that intermediate-dose GHSR activation selectively alters behavior during conflict-based decision-making paradigms while sparing performance during simple non-conflict conditions.                         |
| <b>Fig. 1E</b><br>Chow in home cage                                                        | Paired t-test found no significant difference in amount of food consumed in the home cage between rats who received low-dose IBU to those that received saline (Paired t-test: $t(18)=0.12$ , $p=0.904$ ). Rats=19.                                                                                                                                                                                                                                                                                                                                                                                                                                                                                                                                                                                                                                                                             |                                                                                                                                                                                                                                                                                                                                                                                                                                                                                                                                                                                                                                                         |
| <b>Fig. 1F</b><br>Food alone task feeding                                                  | No significant difference in amount of food consumed was found in Food alone task (unpaired t-test ( $t(25.87) = 1.115$ , $p=0.275$ ) between SAL (rats=14) and 2x IBU treated rats (rats=14).                                                                                                                                                                                                                                                                                                                                                                                                                                                                                                                                                                                                                                                                                                  |                                                                                                                                                                                                                                                                                                                                                                                                                                                                                                                                                                                                                                                         |
| <b>Fig. 1G</b><br>Food+light task feeding                                                  | No significant difference in amount of food consumed was found in food-light task (unpaired t-test: $t(17.49) = 0.5388$ , $p=0.5968$ ) between SAL (rats=14) and 2x IBU treated rats (rats=14).                                                                                                                                                                                                                                                                                                                                                                                                                                                                                                                                                                                                                                                                                                 |                                                                                                                                                                                                                                                                                                                                                                                                                                                                                                                                                                                                                                                         |
| <b>Fig 1H</b><br>Effects of 10x IBU on conflict versus non-conflict behavioral performance | <b>Main effects:</b> To determine whether high levels of GHSR activation alter performance during conflict-based decision-making paradigms, entries into the reward zone were compared between non-conflict tasks and conflict-based tasks following SAL or 10x IBU administration. Raw behavioral data were min-max normalized prior to cross-task comparisons. Group comparisons were analyzed using a two-way ANOVA followed by Tukey's multiple comparisons test. Analysis revealed no significant interaction between treatment and task type ( $F(1,91)=0.1369$ , $p=0.7123$ ) and no significant main effect of IBU treatment ( $F(1,91)=2.009$ , $p=0.1598$ ). A significant main effect of conflict condition was observed ( $F(1,91)=10.62$ , $p=0.0016$ ), indicating overall differences between conflict and non-conflict behavioral paradigms independent of treatment condition. | <b>Post hoc comparisons:</b> Tukey's multiple comparisons test revealed no significant differences between SAL and 10x IBU conditions during either non-conflict tasks ( $p=0.4946$ ) or conflict-based tasks ( $p=0.9059$ ). Similarly, no differences were observed between non-conflict and conflict conditions within the 10x IBU group ( $p=0.1612$ ). Together, these findings demonstrate that high-dose GHSR activation does not significantly alter behavioral performance during either conflict or non-conflict paradigms, further supporting an inverted-U relationship between GHSR activation and conflict-related behavioral modulation. |
| <b>Fig 2C</b>                                                                              | <b>Main effects:</b> cFos expression was quantified within DMS striosome and matrix compartments following                                                                                                                                                                                                                                                                                                                                                                                                                                                                                                                                                                                                                                                                                                                                                                                      | <b>Post hoc comparisons:</b> Post hoc multiple comparisons revealed that the                                                                                                                                                                                                                                                                                                                                                                                                                                                                                                                                                                            |

|                                                                      |                                                                                                                                                                                                                                                                                                                                                                                                                                                                                                                             |                                                                                                                                                                                                                                                                                                                                                                                                                                                                                                                                                                                                                                                                                                                                                                                                                                                                                                                                                                                                                                                                                                                                                                                                             |
|----------------------------------------------------------------------|-----------------------------------------------------------------------------------------------------------------------------------------------------------------------------------------------------------------------------------------------------------------------------------------------------------------------------------------------------------------------------------------------------------------------------------------------------------------------------------------------------------------------------|-------------------------------------------------------------------------------------------------------------------------------------------------------------------------------------------------------------------------------------------------------------------------------------------------------------------------------------------------------------------------------------------------------------------------------------------------------------------------------------------------------------------------------------------------------------------------------------------------------------------------------------------------------------------------------------------------------------------------------------------------------------------------------------------------------------------------------------------------------------------------------------------------------------------------------------------------------------------------------------------------------------------------------------------------------------------------------------------------------------------------------------------------------------------------------------------------------------|
| Striatal cFos expression across IBU doses                            | SAL (rats=7), 0.5x IBU (rats=8), 1x IBU (rats=6), 2x IBU (rats=8), and 10x IBU (rats=8) administration. A two-way ANOVA revealed a significant main effect of IBU dose ( $F(4,64)=32.94$ , $p=7.0 \times 10^{-15}$ ), a significant main effect of region ( $F(1,64)=96.15$ , $p=2.3 \times 10^{-14}$ ), and a significant interaction between dose and region ( $F(4,64)=22.66$ , $p=1.09 \times 10^{-11}$ ), indicating that IBU modulates cFos expression in a region- and dose-dependent manner.                        | effects of IBU dose were driven by selective increases in striosomal cFos expression at intermediate doses (Strio: SAL vs 1x, $p=4.18 \times 10^{-9}$ ; SAL vs 2x, $p=1.02 \times 10^{-11}$ ), while no differences were observed at low or high doses (Strio: SAL vs 0.5x, $p=0.9999$ ; SAL vs 10x, $p=0.9986$ ). Within-dose comparisons confirmed significant differences between striosome and matrix compartments only at 1x and 2x IBU doses (1x: Strio vs Matrix, $p=1.07 \times 10^{-9}$ ; 2x: Strio vs Matrix, $p=9.67 \times 10^{-12}$ ), with no compartment differences observed under SAL, 0.5x, or 10x conditions (SAL: $p=0.9209$ ; 0.5x: $p=0.9826$ ; 10x: $p=0.9999$ ). In contrast, matrix cFos expression did not differ across treatment conditions (Matrix: SAL vs 0.5x, $p>0.9999$ ; SAL vs 1x, $p=0.9994$ ; SAL vs 2x, $p=0.9707$ ; SAL vs 10x, $p=0.9999$ ), indicating that IBU selectively recruits striosomal neurons without altering matrix activity. Together, these findings demonstrate an inverted-U relationship between GHSR activation and striosomal recruitment, with selective engagement of DMS striosomes occurring only at intermediate levels of GHSR signaling. |
| <b>Fig 2F</b><br>Compartment-specific GHSR expression within the DMS | To determine whether Growth Hormone Secretagogue Receptor (GHSR) expression was enriched within the striosomal compartments of the dorsomedial striatum (DMS), GHSR expression was quantified in striatum (rats=7). A paired t-test comparing GHSR expression between compartments revealed significantly greater GHSR expression within striosomes relative to the surrounding matrix (paired t-test: $t(6)=5.656$ , $p=0.0013$ ), indicating preferential localization of GHSR within striosomal compartments of the DMS. |                                                                                                                                                                                                                                                                                                                                                                                                                                                                                                                                                                                                                                                                                                                                                                                                                                                                                                                                                                                                                                                                                                                                                                                                             |
| <b>Fig 2H</b><br>BGHR binding across striatum                        | <b>Main effects:</b> To further validate compartment-specific GHSR localization within the striatum and determine whether prior IBU treatment altered subsequent ghrelin ligand binding, biotinylated ghrelin (BGHR) puncta density was quantified within striosome and matrix compartments following administration of SAL (rats=7), 0.5x IBU (rats=6), 1x IBU (rats=6), 2x IBU (rats=6), and 10x IBU (rats=6). Tissue sections were incubated ex vivo with BGHR                                                           | <b>Post hoc comparisons:</b> Tukey's post hoc multiple comparisons first confirmed significantly greater BGHR puncta density within SAL striosomes relative to SAL matrix compartments ( $p=7 \times 10^{-8}$ ), a secondary validation that GHSR expression is localized predominantly within striosomal compartments. Comparisons across IBU doses further                                                                                                                                                                                                                                                                                                                                                                                                                                                                                                                                                                                                                                                                                                                                                                                                                                                |

|                                                               |                                                                                                                                                                                                                                                                                                                                                                                                                                                                               |                                                                                                                                                                                                                                                                                                                                                                                                                                                                                                                                                                                                                                                                                                                                                                                                                                                                                                                                                                                                                                                                                                                                                                                                                                                                                                                                                                                                                                                                                                                                                                                                    |
|---------------------------------------------------------------|-------------------------------------------------------------------------------------------------------------------------------------------------------------------------------------------------------------------------------------------------------------------------------------------------------------------------------------------------------------------------------------------------------------------------------------------------------------------------------|----------------------------------------------------------------------------------------------------------------------------------------------------------------------------------------------------------------------------------------------------------------------------------------------------------------------------------------------------------------------------------------------------------------------------------------------------------------------------------------------------------------------------------------------------------------------------------------------------------------------------------------------------------------------------------------------------------------------------------------------------------------------------------------------------------------------------------------------------------------------------------------------------------------------------------------------------------------------------------------------------------------------------------------------------------------------------------------------------------------------------------------------------------------------------------------------------------------------------------------------------------------------------------------------------------------------------------------------------------------------------------------------------------------------------------------------------------------------------------------------------------------------------------------------------------------------------------------------------|
|                                                               | <p>to assess ligand binding density across striatal compartments. A two-way ANOVA revealed a significant interaction between IBU dose and compartment (<math>F(4, 52)=4.322, p=0.0043</math>), a significant main effect of IBU dose (<math>F(4, 52)=5.393, p=0.0010</math>), and a significant main effect of compartment (<math>F(1, 52)=65.50, p&lt;0.00000001</math>), indicating that BGHR binding varied across both compartment and prior IBU exposure conditions.</p> | <p>revealed progressive reductions in striosomal BGHR binding following prior IBU administration, consistent with reduced availability of ghrelin ligand binding sites following in vivo GHSR activation. Relative to SAL striosomes, BGHR puncta density was significantly reduced following 0.5x (<math>p=0.0179</math>), 1x (<math>p=0.0143</math>), 2x (<math>p=0.0080</math>), and 10x IBU (<math>p=0.00000797</math>). In contrast, matrix BGHR puncta density did not differ across treatment conditions (all <math>p&gt;0.99</math>), indicating that the effects of IBU were largely restricted to striosomal compartments. Within-dose compartment comparisons further demonstrated significant striosomes enrichment under SAL (<math>p=0.00000007</math>) and 0.5x IBU conditions (<math>p=0.0478</math>), while compartment differences were no longer detected following 1x, 2x, or 10x IBU administration (all <math>p&gt;0.05</math>). Together, these findings demonstrate that GHSR expression is enriched within striosomes under baseline conditions and that prior in vivo IBU administration dose-dependently reduces subsequent BGHR binding, consistent with receptor occupancy and/or reduced ligand accessibility following GHSR activation. IBU-induced reductions in BGHR binding may suggest that intermediate levels of GHSR activation selectively recruit striosomal signaling, whereas high levels of GHSR activation disrupt this compartment-specific state. Excessive GHSR activation collapses striosomal-selective signaling within the dorsal striatum.</p> |
| <p><b>Fig 2K</b><br/>LHb cFos expression across IBU doses</p> | <p><b>Main effects:</b> cFos expression in the LHb was compared across SAL (rats=10), 0.5x IBU (rats=6), 1x IBU (rats=8), 2x IBU (rats=6), and 10x IBU (rats=6) conditions to determine whether IBU dose-dependently modulates LHb activity. A one-way ANOVA revealed a significant effect of IBU concentration on LHb cFos expression (<math>F(4,31)=14.52, p=8.7 \times 10^{-8}</math>), indicating a dose-dependent effect of IBU on LHb activation</p>                    | <p><b>Post hoc comparisons:</b> Tukey post hoc multiple comparisons showed that LHb cFos expression was significantly increased under both 1x and 2x IBU conditions compared to SAL (SAL vs 1x, <math>p=2.09 \times 10^{-5}</math>; SAL vs 2x, <math>p=1.32 \times 10^{-5}</math>), whereas no differences were observed between SAL and either 0.5x or 10x IBU (SAL vs 0.5x, <math>p=0.665</math>; SAL vs 10x, <math>p=0.823</math>). Similarly, both 1x and 2x conditions showed significantly greater cFos expression relative to 0.5x IBU</p>                                                                                                                                                                                                                                                                                                                                                                                                                                                                                                                                                                                                                                                                                                                                                                                                                                                                                                                                                                                                                                                  |

|                                                                      |                                                                                                                                                                                                                                                                                                                                                                                                                                                                                              |                                                                                                                                                                                                                                                                                                                                                                                                                                                                                                                                                                                                                                                                                                                                                                                                                                                                                                                                                                                                                                                               |
|----------------------------------------------------------------------|----------------------------------------------------------------------------------------------------------------------------------------------------------------------------------------------------------------------------------------------------------------------------------------------------------------------------------------------------------------------------------------------------------------------------------------------------------------------------------------------|---------------------------------------------------------------------------------------------------------------------------------------------------------------------------------------------------------------------------------------------------------------------------------------------------------------------------------------------------------------------------------------------------------------------------------------------------------------------------------------------------------------------------------------------------------------------------------------------------------------------------------------------------------------------------------------------------------------------------------------------------------------------------------------------------------------------------------------------------------------------------------------------------------------------------------------------------------------------------------------------------------------------------------------------------------------|
|                                                                      |                                                                                                                                                                                                                                                                                                                                                                                                                                                                                              | (0.5x vs 1x, $p = 0.0054$ ; 0.5x vs 2x, $p=0.0023$ ). No differences were observed between the 1x and 2x IBU groups ( $p=0.973$ ), indicating similar levels of LHb activation at intermediate doses. In contrast, both intermediate doses showed significantly greater cFos expression than the 10x condition (1x vs 10x, $p=0.0026$ ; 2x vs 10x, $p=0.0011$ ), further supporting a nonlinear dose-dependent effect of IBU on LHb activity.                                                                                                                                                                                                                                                                                                                                                                                                                                                                                                                                                                                                                 |
| <b>Fig 2M</b><br>daSNc pPDH expression across IBU doses              | <b>Main effects:</b> pPDH expression in the daSNc was compared across SAL (rats=6), 0.5x IBU (rats=6), 1x IBU (rats=6), 2x IBU (rats=7), and 10x IBU (rats=6) conditions to determine whether IBU dose-dependently modulates neuronal inactivity within dopaminergic SNc regions. A one-way ANOVA revealed a significant main effect of IBU concentration on pPDH expression ( $F(4, 26)=17.89$ , $p=3.61 \times 10^{-7}$ ), indicating a dose-dependent effect of IBU on daSNc pPDH levels. | <b>Post hoc comparisons:</b> Post hoc multiple comparisons showed that pPDH expression was significantly increased under both 1x and 2x IBU conditions compared to SAL (SAL vs 1x, $p=0.0031$ ; SAL vs 2x, $p=1.81 \times 10^{-5}$ ), whereas no differences were observed between SAL and either 0.5x or 10x IBU (SAL vs 0.5x, $p=0.99997$ ; SAL vs 10x, $p=0.9970$ ). Similarly, both 1x and 2x IBU conditions showed significantly greater pPDH expression relative to 0.5x IBU (0.5x vs 1x, $p=0.0023$ ; 0.5x vs 2x, $p=1.35 \times 10^{-5}$ ), while no differences were observed between 0.5x and 10x conditions ( $p=0.9994$ ). No significant differences were detected between the 1x and 2x IBU groups ( $p=0.373$ ), indicating comparable levels of daSNc pPDH expression at intermediate doses. In contrast, both intermediate doses showed significantly greater pPDH expression than the 10x condition (1x vs 10x, $p=0.0013$ ; 2x vs 10x, $p=7.45 \times 10^{-6}$ ), supporting a nonlinear dose-dependent effect of IBU on daSNc inactivity. |
| <b>Fig. 3B</b><br>Striosomal specificity of hM4D(Gi) viral targeting | To determine the compartment-specificity of viral targeting in Oprm1-Cre rat rats, the percentage of hM4D(Gi)-positive cells localized within striosome and matrix compartments was quantified following viral expression. A paired t-test comparing the percentage of virus-positive cells between striosome and matrix compartments revealed a significant enrichment of hM4D(Gi) expression within striosomes (paired t-test: $t(5)=12.27$ , $p=6.37 \times 10^{-5}$ ; rats=6).           | Confirming selective striosomal targeting of the inhibitory DREADD virus                                                                                                                                                                                                                                                                                                                                                                                                                                                                                                                                                                                                                                                                                                                                                                                                                                                                                                                                                                                      |

|                                                                                      |                                                                                                                                                                                                                                                                                                                                                                                                                                                                                                                                                                                                                                                                                                                                                                                                                                                                                                                                                                                                                                                                                                                                                 |                                                                                                                                                                                                                                                                                                                                                                                                                                                                                                                                                                                                                                                                                                                                                                                                                                                                                                                                                                                                                                                                                                                                                                                                                                                                                                                                                                                                                                                                                                                                                                                                                                                                                                                                   |
|--------------------------------------------------------------------------------------|-------------------------------------------------------------------------------------------------------------------------------------------------------------------------------------------------------------------------------------------------------------------------------------------------------------------------------------------------------------------------------------------------------------------------------------------------------------------------------------------------------------------------------------------------------------------------------------------------------------------------------------------------------------------------------------------------------------------------------------------------------------------------------------------------------------------------------------------------------------------------------------------------------------------------------------------------------------------------------------------------------------------------------------------------------------------------------------------------------------------------------------------------|-----------------------------------------------------------------------------------------------------------------------------------------------------------------------------------------------------------------------------------------------------------------------------------------------------------------------------------------------------------------------------------------------------------------------------------------------------------------------------------------------------------------------------------------------------------------------------------------------------------------------------------------------------------------------------------------------------------------------------------------------------------------------------------------------------------------------------------------------------------------------------------------------------------------------------------------------------------------------------------------------------------------------------------------------------------------------------------------------------------------------------------------------------------------------------------------------------------------------------------------------------------------------------------------------------------------------------------------------------------------------------------------------------------------------------------------------------------------------------------------------------------------------------------------------------------------------------------------------------------------------------------------------------------------------------------------------------------------------------------|
| <p><b>Fig. 3D (top)</b><br/>Time-dependent effects of IBU on striosomal activity</p> | <p><b>Main effects:</b> To determine whether intermediate and high IBU doses differentially modulate striosomal activity across time, in vivo calcium imaging was performed following administration of 2x or 10x IBU (rats=4, fields of view=6). Calcium dynamics were monitored longitudinally across multiple time points (0, 30, 60, 120, 180, 240, 300, and 360 min) to assess the temporal effects of IBU-induced striosomal activity. Because individual rats displayed different baseline numbers of active cells, data were normalized to each animal's baseline recording by calculating the change in active cells relative to the 0 min condition at each subsequent time point. Raw non-normalized values are shown in fig. S5E. Data were analyzed using a mixed-effects model with matching time points. Analysis revealed a significant main effect of time (<math>F(7, 35)=3.562</math>, <math>p=0.0054</math>) and a significant main effect of IBU dose (<math>F(1, 5)=36.59</math>, <math>p=0.0018</math>), indicating that striosomal activity varies across time and differs between intermediate and high IBU doses.</p> | <p><b>Post hoc comparisons:</b> Post hoc multiple comparisons revealed that 2x IBU results in elevated striosomal activity beginning approximately 30–120 min following administration, consistent with the delayed pharmacokinetics of IBU. 2x IBU produced greater striosomal activity than 10x IBU across matched time points from baseline through 300 min (0 min, <math>p=0.000034</math>; 30 min, <math>p=0.000034</math>; 60 min, <math>p=0.000034</math>; 120 min, <math>p=0.000034</math>; 180 min, <math>p=0.000034</math>; 240 min, <math>p=0.000034</math>; 300 min, <math>p=0.000034</math>), indicating prolonged activation under intermediate-dose conditions. Within the 2x IBU condition, striosomal activity remained relatively stable across 30–180 min (all <math>p&gt;0.88</math>), suggesting a prolonged plateau of elevated striosomal activity during this interval. In contrast, the 10x IBU dose showed prolonged suppression of striosomal activity relative to baseline conditions. Comparisons between early baseline time points and later 10x recordings demonstrated significantly reduced activity at 300 min (0 vs 300 min, <math>p=0.019</math>), with suppressed activity persisting through 360 min, indicating that high-dose IBU inhibited striosomal activity for well over 5 hr following administration. Together, these findings indicate that intermediate IBU doses produce sustained striosomal activation peaking approximately 2–3 hr following administration, whereas high doses suppress striosomal signaling below baseline levels across an extended recording window, supporting an inverted-U relationship between GHSR activation and striosomal calcium dynamics.</p> |
| <p><b>Fig 3D (bottom)</b><br/>Time-dependent effects of endogen</p>                  | <p><b>Main effects:</b> To determine whether aGHR dose differentially modulates striosomal activity across time, in vivo calcium imaging was performed following administration of an intermediate dose (4.3 <math>\mu\text{g}/\text{kg}</math>, rats=2) or high dose (86 <math>\mu\text{g}/\text{kg}</math>, rats=3) aGHR. Calcium activity was monitored across multiple time points (0, 10, 15, 30, 60, and 120 min) to assess the temporal dynamics of GHSR-mediated striosomal</p>                                                                                                                                                                                                                                                                                                                                                                                                                                                                                                                                                                                                                                                         | <p><b>Post hoc comparisons:</b> Post hoc multiple comparisons revealed that both aGHR doses produced peak effects approximately 15 min following administration. Under the high-dose condition (86 <math>\mu\text{g}/\text{kg}</math>), striosomal activity was significantly reduced beginning at 10 min (0 vs 10 min, <math>p=0.0411</math>), reached</p>                                                                                                                                                                                                                                                                                                                                                                                                                                                                                                                                                                                                                                                                                                                                                                                                                                                                                                                                                                                                                                                                                                                                                                                                                                                                                                                                                                       |

|                                                                                 |                                                                                                                                                                                                                                                                                                                                                                                                                                                                                                                                                                                                                                                                                                                                                           |                                                                                                                                                                                                                                                                                                                                                                                                                                                                                                                                                                                                                                                                                                                                                                                                                                                                                                                                                                       |
|---------------------------------------------------------------------------------|-----------------------------------------------------------------------------------------------------------------------------------------------------------------------------------------------------------------------------------------------------------------------------------------------------------------------------------------------------------------------------------------------------------------------------------------------------------------------------------------------------------------------------------------------------------------------------------------------------------------------------------------------------------------------------------------------------------------------------------------------------------|-----------------------------------------------------------------------------------------------------------------------------------------------------------------------------------------------------------------------------------------------------------------------------------------------------------------------------------------------------------------------------------------------------------------------------------------------------------------------------------------------------------------------------------------------------------------------------------------------------------------------------------------------------------------------------------------------------------------------------------------------------------------------------------------------------------------------------------------------------------------------------------------------------------------------------------------------------------------------|
| ous<br>acyl-<br>ghrelin<br>(aGHR)<br>on<br>striosomal<br>activity               | signaling. Because individual rats displayed different baseline numbers of active cells, data were normalized to each animal's baseline recording by calculating the change in active cells relative to the 0 min condition at each subsequent time point. Raw non-normalized values are shown in fig. S5E. Data were analyzed using a mixed-effects model with matching time points. Analysis revealed a significant main effect of time ( $F(5,14)=8.230$ , $p=0.00083$ ), a significant main effect of aGHR concentration ( $F(1,3)=34.14$ , $p=0.00999$ ), and a significant interaction between time and aGHR concentration ( $F(5,14)=29.16$ , $p=0.0000063$ ), indicating that aGHR dose differentially modulates striosomal activity across time. | maximal effects at 15 min (0 vs 15 min, $p=0.000012$ ), and remained significantly inhibited through 60 min (0 vs 30 min, $p=0.00011$ ; 0 vs 60 min, $p=0.0029$ ), before returning toward baseline levels by 120 min ( $p=0.2140$ ). In contrast, the intermediate dose (4.3 ug/kg) significant increased activity beginning at 10 min (0 vs 10 min, $p=0.0303$ ), with maximal effects observed at 15 min (0 vs 15 min, $p=0.000063$ ), followed by rapid normalization by 30–120 min (all $p>0.46$ ). Comparisons within the 4.3 ug/kg condition further demonstrated that activity significantly declined following the 15 min peak (15 vs 30 min, $p=0.00016$ ; 15 vs 60 min, $p=0.000026$ ; 15 vs 120 min, $p=0.000070$ ). Together, these findings demonstrate that endogenous aGHR rapidly modulates striosomal activity, with peak effects occurring approximately 15 min following administration and largely resolving within 30–120 min depending on dose |
| <b>Fig 3E (top)</b><br><br>In vivo striosomal calcium activity across IBU doses | <b>Main effects):</b> In vivo calcium imaging was performed to determine whether IBU dose-dependently modulates striosomal activity. Calcium dynamics were compared across SAL, 1x, 2x, 10x, and 30x IBU conditions using repeated recordings from the same rats (rats=8; fields of view=10). A repeated-measures ANOVA revealed a significant main effect of IBU dose on the number of active striosomal cells ( $F(1.904, 17.13)=16.54$ , $p=0.000117$ ), indicating that IBU modulates striosomal activity depending on dose.                                                                                                                                                                                                                          | <b>Post hoc comparisons:</b> Post hoc multiple comparisons revealed that 2x IBU produced prolonged elevations in striosomal activity beginning approximately 30–120 min following administration, consistent with the delayed pharmacokinetics of IBU. Relative to corresponding 10x conditions, 2x IBU produced significantly greater activity at 30 min ( $p=0.00031$ ), 60 min ( $p=0.00031$ ), 120 min ( $p=0.00031$ ), 180 min ( $p=0.00031$ ), 240 min ( $p=0.00031$ ), and 300 min ( $p=0.00031$ ), indicating sustained divergence between intermediate and high IBU doses across the majority of the recording period. Although several within-dose comparisons for the 2x condition did not survive multiple-comparisons correction, striosomal activity remained elevated above baseline-associated levels throughout the 120–300 min interval, consistent with                                                                                            |

|                                                                                                        |                                                                                                                                                                                                                                                                                                                                                                                                                                                                                                                                                                                                                                                                                                                                                                                                  |                                                                                                                                                                                                                                                                                                                                                                                                                                                                                                                                                                                                                                                                                                                                                                                                                                                                                                                                                                                                                                                                                                                                 |
|--------------------------------------------------------------------------------------------------------|--------------------------------------------------------------------------------------------------------------------------------------------------------------------------------------------------------------------------------------------------------------------------------------------------------------------------------------------------------------------------------------------------------------------------------------------------------------------------------------------------------------------------------------------------------------------------------------------------------------------------------------------------------------------------------------------------------------------------------------------------------------------------------------------------|---------------------------------------------------------------------------------------------------------------------------------------------------------------------------------------------------------------------------------------------------------------------------------------------------------------------------------------------------------------------------------------------------------------------------------------------------------------------------------------------------------------------------------------------------------------------------------------------------------------------------------------------------------------------------------------------------------------------------------------------------------------------------------------------------------------------------------------------------------------------------------------------------------------------------------------------------------------------------------------------------------------------------------------------------------------------------------------------------------------------------------|
|                                                                                                        |                                                                                                                                                                                                                                                                                                                                                                                                                                                                                                                                                                                                                                                                                                                                                                                                  | <p>a prolonged activation phase peaking approximately 2–3 hr following administration. In contrast, the 10x condition failed to produce sustained activation and instead showed prolonged suppression of striosomal activity. Comparisons within the 10x condition demonstrated significantly reduced activity at 300 min relative to baseline (0 vs 300 min, <math>p=0.0187</math>), with suppressed activity persisting through 360 min, indicating that high-dose IBU inhibited striosomal signaling for well over 5 hr following administration. Together, these findings support a bidirectional dose-dependent effect of IBU on striosomal activity, where intermediate doses induce prolonged activation while high doses suppress activity below baseline levels across an extended temporal window.</p>                                                                                                                                                                                                                                                                                                                |
| <p><b>Fig 3E (bottom)</b><br/>In vivo striosomal calcium activity across acyl-ghrelin (aGHR) doses</p> | <p><b>Main effects:</b> To determine whether the dose-dependent striosomal activity observed following IBU administration was IBU-specific effect or GHSR activation effect, in vivo calcium imaging was performed administration of increasing doses of endogenous aGHR. Calcium dynamics were compared across SAL, intermediate aGHR doses (4.3 and 8.6 ug/kg), high doses (26 and 86 ug/kg), and an ultra-high dose (125 ug/kg) using repeated recordings from the same rats (rats=8; fields of view=10). A repeated-measures one-way ANOVA revealed a significant main effect of acyl-ghrelin dose on the number of active striosomal cells (<math>F(2.412, 21.71)=20.89</math>, <math>p=0.000004</math>), indicating that acyl-ghrelin modulates striosomal activity depending on dose.</p> | <p><b>Post hoc comparisons:</b> Tukey's multiple comparisons test showed that intermediate aGHR doses significantly increased the number of active striosomal cells relative to SAL (SAL vs 4.3 ug/kg, <math>p=0.0050</math>; SAL vs 8.6 ug/kg, <math>p=0.0109</math>), whereas higher doses did not differ from SAL (SAL vs 26 ug/kg, <math>p=0.2345</math>; SAL vs 86 ug/kg, <math>p=0.0766</math>). In contrast, the ultra-high 125 ug/kg dose significantly reduced striosomal activity relative to SAL (<math>p=0.0313</math>), indicating suppression of baseline activity at excessive aGHR concentrations. No differences were observed between the two intermediate doses (4.3 vs 8.6 ug/kg, <math>p=0.9344</math>), suggesting comparable increases in striosomal activity. Both intermediate doses also showed significantly greater activity than high and ultra-high doses (4.3 vs 26 ug/kg, <math>p=0.0439</math>; vs 86 ug/kg, <math>p=0.0012</math>; vs 125 ug/kg, <math>p=0.0015</math>; 8.6 vs 86 ug/kg, <math>p=0.0111</math>; vs 125 ug/kg, <math>p=0.0070</math>). Similarly, the 26 ug/kg dose showed</p> |

|                                                                                             |                                                                                                                                                                                                                                                                                                                                                                                                                                                                                                                                                                                                                                                                                                                                                                                                                                                                                                                                    |                                                                                                                                                                                                                                                                                                                                                                                                                                                                                                                                                                                                                                                                                                                                                                                                                                                                                                                                                                                                                                                                                                                                                                                                                                                                                                                                                                                                                                                                                                                                                                                                    |
|---------------------------------------------------------------------------------------------|------------------------------------------------------------------------------------------------------------------------------------------------------------------------------------------------------------------------------------------------------------------------------------------------------------------------------------------------------------------------------------------------------------------------------------------------------------------------------------------------------------------------------------------------------------------------------------------------------------------------------------------------------------------------------------------------------------------------------------------------------------------------------------------------------------------------------------------------------------------------------------------------------------------------------------|----------------------------------------------------------------------------------------------------------------------------------------------------------------------------------------------------------------------------------------------------------------------------------------------------------------------------------------------------------------------------------------------------------------------------------------------------------------------------------------------------------------------------------------------------------------------------------------------------------------------------------------------------------------------------------------------------------------------------------------------------------------------------------------------------------------------------------------------------------------------------------------------------------------------------------------------------------------------------------------------------------------------------------------------------------------------------------------------------------------------------------------------------------------------------------------------------------------------------------------------------------------------------------------------------------------------------------------------------------------------------------------------------------------------------------------------------------------------------------------------------------------------------------------------------------------------------------------------------|
|                                                                                             |                                                                                                                                                                                                                                                                                                                                                                                                                                                                                                                                                                                                                                                                                                                                                                                                                                                                                                                                    | <p>significantly greater activity than both 86 ug/kg and 125 ug/kg conditions (<math>p=0.0111</math> and <math>p=0.0434</math>, respectively), while no differences were observed between 86 ug/kg and 125 ug/kg doses (<math>p=0.9601</math>). Together, these findings demonstrate that modulation of striosomal activity is a general feature of GHSR activation and not unique to IBU, supporting an inverted-U relationship between ghrelin signaling and striosomal circuit activity.</p>                                                                                                                                                                                                                                                                                                                                                                                                                                                                                                                                                                                                                                                                                                                                                                                                                                                                                                                                                                                                                                                                                                    |
| <p><b>Fig 4C</b><br/>Effects of striosomal chemogenetic manipulation on cFos expression</p> | <p><b>Main effects:</b> To determine whether selective manipulation of striosomal neurons altered IBU-induced recruitment of the striosomal circuit, cFos-positive cells were quantified within MOR-positive striosomal ROIs and only in neurons co-expressing the DREADD virus, identified by either HA-tag or mCherry labeling depending on the viral construct. Experimental groups included SAL (rats=7), Cre+IBU (rats=6), Inh IBU (inhibitory hM4Di + CNO + IBU; rats=8), Inh SAL (hM4Di + CNO +SAL; rats=6), Exc SAL (excitatory hM3Dq + CNO +SAL; rats=6), Exc IBU (excitatory + CNO + IBU; rats=6), and WT + CNO saline controls (CNO SAL; rats=6). Group comparisons were analyzed using a one-way ANOVA followed by Tukey's multiple comparisons test. Analysis revealed a significant main effect of treatment group on striosomal cFos expression (<math>F(6,37)=23.27</math>, <math>p&lt;0.000000000035</math>).</p> | <p><b>Post hoc comparisons - inhibitory manipulation:</b> Tukey's multiple comparisons test revealed that 2x IBU significantly increased striosomal cFos expression relative to SAL conditions (<math>p=0.0000057</math>). Importantly, inhibitory chemogenetic suppression of striosomal neurons abolished the effects of IBU, as the Inh IBU group showed significantly lower striosomal cFos expression relative to the Cre+IBU condition (<math>p=9.38 \times 10^{-7}</math>) and was not different from SAL conditions (<math>p=0.996</math>). Similarly, the Inh SAL group was significantly lower than the Cre+IBU condition (<math>p=3.91 \times 10^{-6}</math>) and was not different from SAL controls (<math>p = 0.9997</math>). CNO SAL rats that received CNO did not differ from SAL conditions (<math>p=0.9999</math>), indicating that CNO administration alone did not alter striosomal activity in rats lacking DREADD expression.</p> <p><b>Post hoc comparisons - excitatory manipulation:</b> Excitatory chemogenetic activation of striosomal neurons mimicked the effects of IBU, as the Exc SAL group displayed significantly greater striosomal cFos expression relative to SAL controls (<math>p=4.72 \times 10^{-7}</math>) and was not different from the Cre+IBU group (<math>p = 0.9851</math>). Similarly, the Exc IBU group was significantly elevated relative to SAL conditions (<math>p=0.000033397</math>) and did not differ from the Cre+IBU condition (<math>p=0.8556</math>). Both excitatory groups also showed significantly greater striosomal cFos</p> |

|                                                                                   |                                                                                                                                                                                                                                                                                                                                                                                                                                                                                                                                                                                                                                                                                                                                                                                                                                                                                                                                                                                                                                                            |                                                                                                                                                                                                                                                                                                                                                                                                                                                                                                                                                                                                                                                                                                                                                                                                                                                                                                                                                                                                                                                                                                                                               |
|-----------------------------------------------------------------------------------|------------------------------------------------------------------------------------------------------------------------------------------------------------------------------------------------------------------------------------------------------------------------------------------------------------------------------------------------------------------------------------------------------------------------------------------------------------------------------------------------------------------------------------------------------------------------------------------------------------------------------------------------------------------------------------------------------------------------------------------------------------------------------------------------------------------------------------------------------------------------------------------------------------------------------------------------------------------------------------------------------------------------------------------------------------|-----------------------------------------------------------------------------------------------------------------------------------------------------------------------------------------------------------------------------------------------------------------------------------------------------------------------------------------------------------------------------------------------------------------------------------------------------------------------------------------------------------------------------------------------------------------------------------------------------------------------------------------------------------------------------------------------------------------------------------------------------------------------------------------------------------------------------------------------------------------------------------------------------------------------------------------------------------------------------------------------------------------------------------------------------------------------------------------------------------------------------------------------|
|                                                                                   |                                                                                                                                                                                                                                                                                                                                                                                                                                                                                                                                                                                                                                                                                                                                                                                                                                                                                                                                                                                                                                                            | expression relative to inhibitory manipulation groups and CNO SAL controls (all $p < 0.00001$ ). Together, these findings demonstrate that inhibitory manipulation blocks IBU-induced striosomal recruitment, whereas excitatory manipulation phenocopies the effects of intermediate-dose GHSR activation on the striosomal circuit.                                                                                                                                                                                                                                                                                                                                                                                                                                                                                                                                                                                                                                                                                                                                                                                                         |
| <b>Fig 4D</b><br>Effects of striosomal manipulation on non-conflict               | <b>Main Effects:</b> To determine whether selective manipulation of striosomal neurons altered performance during non-conflict behavioral conditions, behavioral performance was compared across CNO SAL (rats=14), CNO IBU (rats=14), Inh IBU (inhibitory hM4Di + CNO + IBU; rats=15), Inh SAL (hM4Di + CNO +SAL; rats=15), Exc SAL (excitatory hM3Dq + CNO +SAL; rats=11), and Exc IBU (excitatory + CNO + IBU; rats=11). The inhibitory cohort (rats=15) underwent repeated testing under both SAL and IBU conditions, while the excitatory cohort (rats=11) similarly underwent testing under both SAL and IBU conditions. WT rats consisted of separate littermate control groups matched for age and surgical procedures but lacking Cre expression, and therefore did not express DREADD receptors despite receiving identical viral and CNO treatments. Group comparisons were analyzed using a one-way ANOVA followed by Tukey's multiple comparisons test. Analysis revealed a main effect of treatment group ( $F(5, 234)=3.085$ , $p=0.0102$ ) | <b>Post hoc comparisons:</b> Despite the overall main effect, post hoc multiple comparisons revealed no significant differences between CNO SAL and CNO IBU groups ( $p=0.9989$ ), reproducing our earlier findings that intermediate-dose IBU does not significantly alter performance during simple, non-conflict behavioral tasks. Similarly, no significant differences were observed between WT controls and either inhibitory or excitatory chemogenetic manipulation groups (all $p > 0.19$ ), suggesting that neither activation nor inhibition of striosomal neurons substantially altered performance during non-conflict behavioral conditions. The only significant post hoc comparison observed was between the Inh IBU and Exc IBU groups ( $p=0.0032$ ), indicating that inhibitory and excitatory manipulations produced opposing behavioral effects under IBU conditions. However, because neither group differed significantly from WT controls or saline conditions individually, these findings overall suggest that striosomal recruitment does not strongly influence performance during simple non-conflict behaviors. |
| <b>Fig 4E</b><br>Effects of striosomal chemogenetic manipulation on conflict-task | <b>Main effects:</b> To determine whether recruitment of the striosomal circuit mediates the behavioral effects of intermediate-dose IBU during conflict-based decision-making, behavioral performance was compared across CNO SAL (rats=12), CNO IBU (rats=14), Inh IBU (inhibitory hM4Di + CNO + IBU; rats=15), Inh SAL (hM4Di + CNO +SAL; rats=15), Exc SAL (excitatory hM3Dq + CNO +SAL; rats=7), and Exc IBU (excitatory + CNO + IBU; rats=13) groups. Group comparisons were analyzed using an ordinary one-way ANOVA followed by Tukey's multiple comparisons test. Analysis revealed a                                                                                                                                                                                                                                                                                                                                                                                                                                                             | <b>Post hoc comparisons:</b> Tukey's multiple comparisons test first reconfirmed our earlier findings that 2x IBU significantly alters performance during conflict-based tasks (CNO IBU vs CNO SAL, $p=0.0067$ ). These experiments were performed in an independent cohort of rats and reproduced the same behavioral phenotype observed previously, demonstrating that the behavioral effects of 2x IBU remain intact following viral                                                                                                                                                                                                                                                                                                                                                                                                                                                                                                                                                                                                                                                                                                       |

|                                                |                                                                                                                                                                                                                                                                                                          |                                                                                                                                                                                                                                                                                                                                                                                                                                                                                                                                                                                                                                                                                                                                                                                                                                                                                                                                                                                                                                                                                                                                                                                                                                                                                                                                                                                                                                                                                                                                                                                                                                                                                                                                                                                                                     |
|------------------------------------------------|----------------------------------------------------------------------------------------------------------------------------------------------------------------------------------------------------------------------------------------------------------------------------------------------------------|---------------------------------------------------------------------------------------------------------------------------------------------------------------------------------------------------------------------------------------------------------------------------------------------------------------------------------------------------------------------------------------------------------------------------------------------------------------------------------------------------------------------------------------------------------------------------------------------------------------------------------------------------------------------------------------------------------------------------------------------------------------------------------------------------------------------------------------------------------------------------------------------------------------------------------------------------------------------------------------------------------------------------------------------------------------------------------------------------------------------------------------------------------------------------------------------------------------------------------------------------------------------------------------------------------------------------------------------------------------------------------------------------------------------------------------------------------------------------------------------------------------------------------------------------------------------------------------------------------------------------------------------------------------------------------------------------------------------------------------------------------------------------------------------------------------------|
| performance                                    | significant main effect of treatment group on conflict-task performance ( $F(5,146)=6.668, p=1.27 \times 10^{-5}$ ).                                                                                                                                                                                     | <p>surgery, CNO administration, and other experimental manipulations. Inhibitory chemogenetic suppression of striosomal neurons blocked the behavioral effects of IBU. The Inh IBU group differed significantly from CNO IBU rats (<math>p=0.0320</math>) but not from CNO SAL controls (<math>p=0.9834</math>), indicating that striosomal inhibition returned behavior to baseline levels. No differences were observed between inhibitory groups (Inh IBU vs Inh SAL, <math>p=0.7269</math>), further supporting that blockade of the IBU behavioral phenotype was specifically caused by striosomal inhibition rather than nonspecific surgical or treatment-related effects.</p> <p>In contrast, excitatory chemogenetic activation of striosomal neurons, even in the absence of IBU, was sufficient to mimic the behavioral effects of IBU (CNO IBU vs Exc SAL, <math>p=0.0245</math>), yield behavioral patterns significantly different from CNO SAL control (<math>p=0.9999</math>). Similarly, the Exc IBU group differed significantly from CNO SAL controls (<math>p=0.00014</math>) but not from CNO IBU rats (<math>p=0.8638</math>). No differences were observed between both excitatory groups (Exc SAL vs Exc IBU, <math>p=0.9776</math>), indicating that excitatory manipulation alone was sufficient to reproduce the behavioral phenotype associated with GHSR activation. Finally, inhibitory and excitatory manipulation of striosomal neurons produced significantly different behavioral outcomes under identical IBU conditions, (Inh IBU vs Exc IBU, <math>p=0.00079</math>). Together, these findings demonstrate that striosomal recruitment is necessary for mediating the behavioral effects of intermediate-dose GHSR activation during conflict-based decision-making tasks.</p> |
| <b>Fig 4F</b><br>Effects of striosomal manipul | <b>Main effects:</b> To determine whether GHSR-induced recruitment of the LHb was dependent on striosomal activity, cFos-positive cells were quantified within the LHb following chemogenetic manipulation of striosomal neurons using Cre-dependent DREADD expression. Experimental groups included SAL | <b>Post hoc comparisons - inhibitory manipulation:</b> Tukey's multiple comparisons test confirmed that IBU significantly increased LHb cFos expression relative to SAL conditions ( $p=0.0000024$ ). Inhibitory chemogenetic                                                                                                                                                                                                                                                                                                                                                                                                                                                                                                                                                                                                                                                                                                                                                                                                                                                                                                                                                                                                                                                                                                                                                                                                                                                                                                                                                                                                                                                                                                                                                                                       |

|                                  |                                                                                                                                                                                                                                                                                                                                                                                                                                                                                                                             |                                                                                                                                                                                                                                                                                                                                                                                                                                                                                                                                                                                                                                                                                                                                                                                                                                                                                                                                                                                                                                                                                                                                                                                                                                                                                                                                                                                                                                                                                                                                                                                                                                                                                                                                                                                                                                                                                                                           |
|----------------------------------|-----------------------------------------------------------------------------------------------------------------------------------------------------------------------------------------------------------------------------------------------------------------------------------------------------------------------------------------------------------------------------------------------------------------------------------------------------------------------------------------------------------------------------|---------------------------------------------------------------------------------------------------------------------------------------------------------------------------------------------------------------------------------------------------------------------------------------------------------------------------------------------------------------------------------------------------------------------------------------------------------------------------------------------------------------------------------------------------------------------------------------------------------------------------------------------------------------------------------------------------------------------------------------------------------------------------------------------------------------------------------------------------------------------------------------------------------------------------------------------------------------------------------------------------------------------------------------------------------------------------------------------------------------------------------------------------------------------------------------------------------------------------------------------------------------------------------------------------------------------------------------------------------------------------------------------------------------------------------------------------------------------------------------------------------------------------------------------------------------------------------------------------------------------------------------------------------------------------------------------------------------------------------------------------------------------------------------------------------------------------------------------------------------------------------------------------------------------------|
| <p>ation on<br/>LHb<br/>cFos</p> | <p>(rats=10), IBU (rats=6), Inh IBU (inhibitory hM4Di + CNO + IBU; rats=7), Inh SAL (hM4Di + CNO + SAL; rats=8), Exc SAL (excitatory hM3Dq + CNO + SAL; rats=6), Exc IBU (excitatory + CNO + IBU; rats=6), and WT + CNO saline controls (CNO SAL; rats=6). Group comparisons were analyzed using a one-way ANOVA followed by Tukey's multiple comparisons test. Analysis revealed a significant main effect of treatment group on LHb cFos expression (<math>F(6,42)=13.25</math>, <math>p=2.34 \times 10^{-8}</math>).</p> | <p>suppression of striosomal neurons abolished the effects of IBU (IBU vs Inh IBU, <math>p=0.000036</math>), returning LHb cFos levels similar to SAL controls (<math>p=0.9995</math>). Similarly, the Inh SAL group differed significantly from the IBU condition (<math>p=0.000032</math>) but was not different from SAL controls (<math>p=0.9968</math>). The Inh IBU and Inh SAL groups also did not differ from one another (<math>p=0.9999</math>), indicating that IBU administration did not increase LHb cFos expression when striosomal neurons were inhibited. WT SAL rats that received CNO alone did not differ from SAL controls (<math>p=0.4761</math>), confirming that CNO administration alone did not alter LHb cFos expression in the absence of DREADD expression.</p> <p><b>Post hoc comparisons - excitatory manipulation:</b> Excitatory chemogenetic activation of striosomal neurons mimicked the effects of IBU, resulting in significantly greater LHb cFos expression relative to SAL controls (<math>p=0.000019</math>) and levels that were not different from the IBU condition (<math>p=0.9973</math>). Similarly, the Exc IBU group showed significantly greater LHb cFos expression relative to SAL conditions (<math>p=0.0015</math>) and did not differ from the IBU group (<math>p=0.5529</math>). Both excitatory groups also showed significantly greater LHb cFos expression relative to inhibitory manipulation groups (all <math>p&lt;0.012</math>). Exc SAL and Exc IBU groups did not differ from one another (<math>p=0.8778</math>), indicating that excitatory manipulation alone was sufficient to recapitulate the effects of intermediate-dose GHSR activation on LHb recruitment. Together, these findings demonstrate that GHSR-induced LHb activation is dependent on striosomal activity and that selective excitation of striosomal neurons is sufficient to</p> |
|----------------------------------|-----------------------------------------------------------------------------------------------------------------------------------------------------------------------------------------------------------------------------------------------------------------------------------------------------------------------------------------------------------------------------------------------------------------------------------------------------------------------------------------------------------------------------|---------------------------------------------------------------------------------------------------------------------------------------------------------------------------------------------------------------------------------------------------------------------------------------------------------------------------------------------------------------------------------------------------------------------------------------------------------------------------------------------------------------------------------------------------------------------------------------------------------------------------------------------------------------------------------------------------------------------------------------------------------------------------------------------------------------------------------------------------------------------------------------------------------------------------------------------------------------------------------------------------------------------------------------------------------------------------------------------------------------------------------------------------------------------------------------------------------------------------------------------------------------------------------------------------------------------------------------------------------------------------------------------------------------------------------------------------------------------------------------------------------------------------------------------------------------------------------------------------------------------------------------------------------------------------------------------------------------------------------------------------------------------------------------------------------------------------------------------------------------------------------------------------------------------------|

|                                                                                        |                                                                                                                                                                                                                                                                                                                                                                                                                                                                                                                                                                                                                                                                                                                                                                                                                                                                                                                                                            |                                                                                                                                                                                                                                                                                                                                                                                                                                                                                                                                                                                                                                                                                                                                                                                                                                                                                                                                                                                                                                                                                                                                                                                                                                                                                                                                                                                                                                                                                                                                                                                                                                                                                                                                                                                                                   |
|----------------------------------------------------------------------------------------|------------------------------------------------------------------------------------------------------------------------------------------------------------------------------------------------------------------------------------------------------------------------------------------------------------------------------------------------------------------------------------------------------------------------------------------------------------------------------------------------------------------------------------------------------------------------------------------------------------------------------------------------------------------------------------------------------------------------------------------------------------------------------------------------------------------------------------------------------------------------------------------------------------------------------------------------------------|-------------------------------------------------------------------------------------------------------------------------------------------------------------------------------------------------------------------------------------------------------------------------------------------------------------------------------------------------------------------------------------------------------------------------------------------------------------------------------------------------------------------------------------------------------------------------------------------------------------------------------------------------------------------------------------------------------------------------------------------------------------------------------------------------------------------------------------------------------------------------------------------------------------------------------------------------------------------------------------------------------------------------------------------------------------------------------------------------------------------------------------------------------------------------------------------------------------------------------------------------------------------------------------------------------------------------------------------------------------------------------------------------------------------------------------------------------------------------------------------------------------------------------------------------------------------------------------------------------------------------------------------------------------------------------------------------------------------------------------------------------------------------------------------------------------------|
|                                                                                        |                                                                                                                                                                                                                                                                                                                                                                                                                                                                                                                                                                                                                                                                                                                                                                                                                                                                                                                                                            | phenocopy the effects of IBU on downstream circuit recruitment.                                                                                                                                                                                                                                                                                                                                                                                                                                                                                                                                                                                                                                                                                                                                                                                                                                                                                                                                                                                                                                                                                                                                                                                                                                                                                                                                                                                                                                                                                                                                                                                                                                                                                                                                                   |
| <p><b>Fig 4G</b><br/>Effects of striosomal chemogenetic manipulation on daSNc pPDH</p> | <p><b>Main effects:</b> To determine whether the GHSR-induced inactivity-associated pPDH expression observed in daSNc was dependent on striosomal activity, pPDH-positive cells were quantified within the daSNc following chemogenetic manipulation of striosomal neurons using Cre-dependent DREADD expression. Quantification was restricted to TH-positive dopaminergic neurons co-expressing pPDH. Experimental groups included SAL (rats=7), IBU (rats=7), Inh IBU (inhibitory hM4Di + CNO + IBU; rats=6), Inh SAL (hM4Di + CNO + SAL; rats=6), Exc SAL (excitatory hM3Dq + CNO + SAL; rats=6), CNO SAL (WT + CNO + SAL; rats=6), and Exc IBU (excitatory + CNO + IBU; rats=6). Group comparisons were analyzed using a one-way ANOVA followed by Tukey's multiple comparisons test. Analysis revealed a significant main effect of treatment group on daSNc pPDH expression (<math>F(6,36)=27.64</math>, <math>p=4.384 \times 10^{-12}</math>).</p> | <p><b>Post hoc comparisons - inhibitory manipulation:</b> Tukey's multiple comparisons test revealed that 2x IBU significantly increased pPDH expression within TH-positive daSNc neurons relative to SAL conditions (<math>p=0.00000051</math>). Inhibitory chemogenetic suppression of striosomal neurons abolished the effects of IBU (IBU vs Inh IBU, <math>p=0.0000000019</math>), returning pPDH levels similar to SAL controls (<math>p=0.5231</math>). Similarly, the Inh SAL group differed significantly from the IBU condition (<math>p=0.0000000047</math>) but was not different from SAL controls (<math>p=0.2522</math>). The Inh IBU and Inh SAL groups also did not differ from one another (<math>p=0.9988</math>), indicating that systemic GHSR activation failed to increase daSNc pPDH expression when striosomal neurons were inhibited. Despite systemic GHSR activation, inhibition of striosomal neurons prevented recruitment of pPDH expression in daSNc, suggesting that at intermediate levels of GHSR signaling, daSNc inactivity occurs downstream of striosomal activation rather than through an independent parallel mechanism. CNO SAL rats that received CNO alone also did not differ from SAL controls (<math>p=0.9732</math>), confirming that CNO administration alone did not alter pPDH expression in TH-positive daSNc neurons in the absence of DREADD expression.</p> <p><b>Post hoc comparisons - excitatory manipulation:</b> Excitatory chemogenetic activation of striosomal neurons mimicked the effects of IBU, resulting in significantly greater pPDH expression relative to SAL controls (<math>p=0.00047</math>) and levels that were not different from the IBU condition (<math>p=0.3881</math>). Similarly, the Exc IBU group showed significantly</p> |

|                                                            |                                                                                                                                                                                                                                                                                                                                                                                                                                                                                               |                                                                                                                                                                                                                                                                                                                                                                                                                                                                                                                                                                                                                                                                                                                                                                                                                      |
|------------------------------------------------------------|-----------------------------------------------------------------------------------------------------------------------------------------------------------------------------------------------------------------------------------------------------------------------------------------------------------------------------------------------------------------------------------------------------------------------------------------------------------------------------------------------|----------------------------------------------------------------------------------------------------------------------------------------------------------------------------------------------------------------------------------------------------------------------------------------------------------------------------------------------------------------------------------------------------------------------------------------------------------------------------------------------------------------------------------------------------------------------------------------------------------------------------------------------------------------------------------------------------------------------------------------------------------------------------------------------------------------------|
|                                                            |                                                                                                                                                                                                                                                                                                                                                                                                                                                                                               | greater pPDH expression relative to SAL conditions ( $p=0.0116$ ). Although the Exc IBU group remained significantly lower than the IBU condition ( $p=0.0367$ ), pPDH expression was still significantly elevated relative to inhibitory manipulation groups and CNO SAL controls (all $p<0.001$ ). Exc SAL and Exc IBU groups also did not differ from one another ( $p=0.9140$ ), indicating that excitatory manipulation alone was sufficient to recapitulate the effects of intermediate-dose GHSR activation on the daSNc inactivity profile. Together, these findings demonstrate that GHSR-induced daSNc pPDH recruitment is dependent on striosomal activity and that selective excitation of striosomal neurons is sufficient to phenocopy the effects of IBU on downstream dopaminergic circuit activity. |
| <b>Fig S1A</b><br>Baseline decision making of simple tasks | RM one-way ANOVA, significant difference in approach rate between the <i>Light alone</i> , <i>Maze alone</i> , <i>Toy alone</i> , and <i>Food only</i> tasks ( $F(3,24)=4.869$ , $p=0.0088$ ). Rats approached the ROI significantly more during the Food only task compared to the <i>Light alone</i> ( $p=0.0092$ ) and <i>Maze alone</i> ( $p=0.0312$ ) tasks, using Tukey post-hoc analysis. Rats = 9.<br>Note: Data shown here are the same saline control values used in <b>fig. S2</b> |                                                                                                                                                                                                                                                                                                                                                                                                                                                                                                                                                                                                                                                                                                                                                                                                                      |
| <b>Fig S1B (left)</b><br>Food alone 2x IBU Long Evans      | Paired t-test, 2x IBU had no significant effect on approach rate ( $t(10)=0.1947$ , $p = 0.8495$ ; rats=11).                                                                                                                                                                                                                                                                                                                                                                                  |                                                                                                                                                                                                                                                                                                                                                                                                                                                                                                                                                                                                                                                                                                                                                                                                                      |
| <b>Fig S1B (right)</b><br>Food alone 2x IBU Oprm1 WT       | Using an unpaired t-test we saw that 2x IBU had no significant effect on approach rate ( $t(23.64)=0.6164$ , $p=0.5435$ ) between SAL (rats=14) and 2x IBU treated rats (rats=14).                                                                                                                                                                                                                                                                                                            |                                                                                                                                                                                                                                                                                                                                                                                                                                                                                                                                                                                                                                                                                                                                                                                                                      |
| <b>Fig S1C (left)</b><br>Toy                               | Paired t-test, 2x IBU had no significant effect on approach rate ( $t(11)= 0.1199$ , $p=0.9067$ ; rats = 12).                                                                                                                                                                                                                                                                                                                                                                                 |                                                                                                                                                                                                                                                                                                                                                                                                                                                                                                                                                                                                                                                                                                                                                                                                                      |

|                                                                               |                                                                                                                                                                                    |  |
|-------------------------------------------------------------------------------|------------------------------------------------------------------------------------------------------------------------------------------------------------------------------------|--|
| alone 2x<br>IBU<br>Long<br>Evans                                              |                                                                                                                                                                                    |  |
| <b>Fig S1C<br/>(right)</b><br>Toy<br>alone 2x<br>IBU<br>Oprm1<br>WT           | Using an unpaired t-test we saw that 2x IBU had no significant effect on approach rate ( $t(19.51)=1.255$ , $p=0.2243$ ) between SAL (rats=14) and 2x IBU treated rats (rats=14).  |  |
| <b>Fig S1D<br/>(left)</b><br>Light<br>alone 2x<br>IBU<br>Long<br>Evans        | Paired t-test, 2x IBU had no significant effect on approach rate ( $t(11)=0.8633$ , $p=0.4064$ ; rats=12).                                                                         |  |
| <b>Fig S1D<br/>(right)</b><br>Light<br>alone 2x<br>IBU<br>Oprm1<br>WT         | Using an unpaired t-test we saw that 2x IBU had no significant effect on approach rate ( $t(24.68)=0.1745$ , $p=0.8629$ ) between SAL (rats=14) and 2x IBU treated rats (rats=14). |  |
| <b>Fig S1E<br/>(left)</b><br><i>Food+light</i> 2x<br>IBU<br>Long<br>Evans     | Paired t-test, significant effect on approach rate when comparing 2x IBU and saline rats ( $t(11)= 2.175$ , $p=0.0407$ ; rats=12).                                                 |  |
| <b>Fig S1E<br/>(right)</b><br><i>Food+light</i> 2x<br>IBU<br>Oprm1<br>WT      | Using an unpaired t-test we saw a significant effect on approach rate ( $t(16.62) =2.363$ , $p=0.0306$ ) between SAL (rats=14) and 2x IBU treated rats (rats=14).                  |  |
| <b>Fig S1F<br/>(left)</b><br><i>Toy+light</i> Task<br>2X IBU<br>Long<br>Evans | Paired t-test, significant effect on approach rate when comparing 2x IBU and saline rats ( $t(15)= 2.146$ , $p =0.0486$ ; rats=16).                                                |  |
| <b>Fig S1F<br/>(right)</b><br><i>Toy+light</i>                                | Using an unpaired t-test we saw a significant effect on approach rate ( $t(9.953) = 2.742$ , $p=0.0209$ ) between SAL (rats=10) and 2x IBU treated rats (rats=14).                 |  |

|                                                                                           |                                                                                                                                                                                                                                                                                                                                                                                                                                                                                                                                                                                                                                                                                                                                                                                                                                                                                                                                                                                                                                                                                                                                                                                                                                                                                                                                              |  |
|-------------------------------------------------------------------------------------------|----------------------------------------------------------------------------------------------------------------------------------------------------------------------------------------------------------------------------------------------------------------------------------------------------------------------------------------------------------------------------------------------------------------------------------------------------------------------------------------------------------------------------------------------------------------------------------------------------------------------------------------------------------------------------------------------------------------------------------------------------------------------------------------------------------------------------------------------------------------------------------------------------------------------------------------------------------------------------------------------------------------------------------------------------------------------------------------------------------------------------------------------------------------------------------------------------------------------------------------------------------------------------------------------------------------------------------------------|--|
| <i>t</i> 2x IBU<br>Oprm1<br>WT                                                            |                                                                                                                                                                                                                                                                                                                                                                                                                                                                                                                                                                                                                                                                                                                                                                                                                                                                                                                                                                                                                                                                                                                                                                                                                                                                                                                                              |  |
| <b>Fig S1G (left)</b><br>Effects of strain and 2x IBU on non-conflict behavioral tasks    | <b>Main effects:</b> To determine whether strain differences contributed to behavioral outcomes across simple non-conflict tasks, behavioral performance was compared between Long-Evans and Oprm1-WT rats following SAL or 2x IBU administration. Because individual behavioral tasks measured different parameters with distinct baselines and ranges, raw values were min-max normalized prior to cross-task comparisons. Three non-conflict behavioral tasks were included in the analysis, and data from both strains were combined into a three-way ANOVA comparing non-conflict task type, strain, and IBU treatment. Analysis revealed no significant main effect of non-conflict task ( $F(2,71) = 0.8290$ , $p=0.4407$ ), strain ( $F(1,71) = 0.1709$ , $p=0.6806$ ), or IBU treatment ( $F(1,71) = 0.3568$ , $p=0.5522$ ). Additionally, no significant interactions were observed between task type, strain, or IBU treatment (all $p > 0.46$ ), indicating that behavioral performance remained consistent across non-conflict paradigms regardless of strain or GHSR activation state. Together, these findings demonstrate that intermediate GHSR activation does not alter performance during non-conflict tasks and that strain differences do not account for the behavioral effects observed in conflict-based paradigms. |  |
| <b>Fig S1G (right)</b><br>Effects of strain and 2x IBU on conflict-based behavioral tasks | <b>Main effects:</b> To determine whether strain differences contributed to behavioral effects observed during conflict-based decision-making tasks, performance across two conflict paradigms was compared between Long-Evans and Oprm1-WT rats following SAL or 2x IBU administration. Because individual behavioral tasks measured different parameters with distinct baselines and ranges, raw values were min-max normalized prior to cross-task comparisons. Data were analyzed using a three-way ANOVA comparing conflict task type, strain, and IBU treatment. Analysis revealed a significant main effect of IBU treatment ( $F(1,48) = 28.90$ , $p<0.0001$ ), indicating that 2x IBU significantly altered performance across conflict-based tasks. In contrast, there was no significant main effect of strain ( $F(1,52)=2.654$ , $p=0.109$ ), indicating that baseline behavioral performance did not differ between Long-Evans and Oprm1-WT rats. Although significant interactions were observed between conflict task and strain ( $F(1,52)=4.423$ , $p=0.0403$ ) and between                                                                                                                                                                                                                                                |  |

|                                                               |                                                                                                                                                                                                                                                                                                                                                                                                                                                                                                                     |  |
|---------------------------------------------------------------|---------------------------------------------------------------------------------------------------------------------------------------------------------------------------------------------------------------------------------------------------------------------------------------------------------------------------------------------------------------------------------------------------------------------------------------------------------------------------------------------------------------------|--|
|                                                               | conflict task, strain, and IBU treatment ( $F(1,48)=4.665$ , $p=0.0358$ ), no significant interaction was observed between strain and IBU treatment ( $F(1,48)=0.4195$ , $p=0.520$ ). Together, these findings indicate that the behavioral effects produced by intermediate GHSR activation during conflict-based decision-making are not driven by strain-specific differences, supporting the conclusion that 2x IBU selectively alters conflict-related behavioral processing across both experimental cohorts. |  |
| <b>Fig S2A</b><br>Non-conflict tasks<br>10x IBU               | A two-way ANOVA (Treatment × Task) revealed no main effect of group, task; and no significant interaction (Effect of IBU: $F(1,51)=1.8$ , $p = 0.186$ ; Effect of task: $F(2,51)=0.78$ , $p=0.462$ ; effect of group x task: $F(2,51)=0.06$ , $p=0.944$ ).                                                                                                                                                                                                                                                          |  |
| <b>Fig S2B</b><br>Food alone task<br>10X IBU<br>OPRM1<br>WT   | Using an unpaired t-test we saw that high dose IBU had no effect on approach rate ( $t(16.92) = 0.4868$ , $p=0.6326$ ) between SAL (rats=9) and 10x IBU treated rats (rats=10).                                                                                                                                                                                                                                                                                                                                     |  |
| <b>Fig S2C</b><br>Toy alone task<br>10X IBU<br>OPRM1<br>WT    | Using a t-test we saw that high dose IBU had no effect on approach rate ( $t(13.02)=0.9073$ , $p=0.3808$ ) between SAL (rats=9) and 10x IBU treated rats (rats=10).                                                                                                                                                                                                                                                                                                                                                 |  |
| <b>Fig S2D:</b><br>Light alone task<br>10X IBU<br>OPRM1<br>WT | Using an unpaired t-test we saw that high dose IBU (rats=10) had no effect on approach rate relative to SAL ( $t(15.63) = 0.9182$ , $p=0.3724$ ) between SAL (rats=9) and 10x IBU treated rats (rats=10).                                                                                                                                                                                                                                                                                                           |  |
| <b>Fig S2E</b><br>conflict tasks<br>10x IBU                   | A two-way ANOVA (Treatment × Task) revealed no main effect of group, task; and no significant interaction (Effect of IBU: $F(1,34)=0.51$ , $p=0.481$ ; Effect of task: $F(1,34)=0.08$ , $p=0.782$ ; effect of group x task: $F(1,34)=2.09$ , $p=0.158$ ).                                                                                                                                                                                                                                                           |  |
| <b>Fig S2F</b><br>Food+light task<br>10X IBU<br>OPRM1<br>WT   | Using an unpaired t-test we saw that high dose IBU had no effect on approach rate ( $t(9.555)=0.1517$ , $p=0.1617$ ) between SAL (rats=9) and 10x IBU treated rats (rats=10).                                                                                                                                                                                                                                                                                                                                       |  |
| <b>Fig S2G</b><br>Toy+light                                   | Unpaired T-test reveals high dose IBU did not alter avoidance in Toy+light conflict task ( $t(14.46)=0.5137$ ,                                                                                                                                                                                                                                                                                                                                                                                                      |  |

|                                                                                                                         |                                                                                                                                                                                                                                                                                                                                                                                                                                                                                                                                                                                                                                                                                                                                                                                                                                                                                                                                                                                                                                                                                                                                                                                |                                                                                                                                                                                                                                                                                                                                                                                                                                                                                                                                                                                                                                                                                                                                      |
|-------------------------------------------------------------------------------------------------------------------------|--------------------------------------------------------------------------------------------------------------------------------------------------------------------------------------------------------------------------------------------------------------------------------------------------------------------------------------------------------------------------------------------------------------------------------------------------------------------------------------------------------------------------------------------------------------------------------------------------------------------------------------------------------------------------------------------------------------------------------------------------------------------------------------------------------------------------------------------------------------------------------------------------------------------------------------------------------------------------------------------------------------------------------------------------------------------------------------------------------------------------------------------------------------------------------|--------------------------------------------------------------------------------------------------------------------------------------------------------------------------------------------------------------------------------------------------------------------------------------------------------------------------------------------------------------------------------------------------------------------------------------------------------------------------------------------------------------------------------------------------------------------------------------------------------------------------------------------------------------------------------------------------------------------------------------|
| t task<br>10X IBU<br>OPRM1<br>WT                                                                                        | p=0.6152) between SAL (rats=9) and 10x IBU treated rats (rats=10).                                                                                                                                                                                                                                                                                                                                                                                                                                                                                                                                                                                                                                                                                                                                                                                                                                                                                                                                                                                                                                                                                                             |                                                                                                                                                                                                                                                                                                                                                                                                                                                                                                                                                                                                                                                                                                                                      |
| <b>Fig S2H</b><br>Chow in<br>home<br>cage<br>10x IBU                                                                    | A significant difference in food consumption was found in chow task (paired t-test: $t(18) = 4.121$ , $p=0.0006$ ) between SAL and 10x IBU treated rats (rats=19).                                                                                                                                                                                                                                                                                                                                                                                                                                                                                                                                                                                                                                                                                                                                                                                                                                                                                                                                                                                                             |                                                                                                                                                                                                                                                                                                                                                                                                                                                                                                                                                                                                                                                                                                                                      |
| <b>Fig S2I</b><br>Food<br>alone<br>10x IBU                                                                              | A significant difference in food consumption was found in the Food alone task (unpaired t-test: $t(15.65)=2.953$ , $p=0.0095$ ) between SAL (rats=9) and 10x IBU treated rats (rats=10).                                                                                                                                                                                                                                                                                                                                                                                                                                                                                                                                                                                                                                                                                                                                                                                                                                                                                                                                                                                       |                                                                                                                                                                                                                                                                                                                                                                                                                                                                                                                                                                                                                                                                                                                                      |
| <b>Fig S2J</b><br>Food+lig<br>ht 10x<br>IBU                                                                             | A significant difference in food consumption was found in the Food+light task (unpaired t: $t(16.94)=2.922$ , $p=0.0095$ ) between SAL (rats=9) and 10x IBU treated rats (rats=10).                                                                                                                                                                                                                                                                                                                                                                                                                                                                                                                                                                                                                                                                                                                                                                                                                                                                                                                                                                                            |                                                                                                                                                                                                                                                                                                                                                                                                                                                                                                                                                                                                                                                                                                                                      |
| <b>Fig S3R</b><br>Whole-<br>brain z-<br>score<br>analysis<br>of cFos<br>expressi<br>on<br>across<br>50 brain<br>regions | To determine how intermediate-dose IBU alters neuronal activity across the brain, cFos expression was quantified in 50 anatomically defined brain regions from SAL and 1x IBU-treated rats (rats = 7-10 per group). To normalize activity differences across regions with different baseline cFos levels, regional cFos expression was converted into z-scores relative to the saline condition. For each brain region, the mean and standard deviation of the SAL group were first calculated. Individual cFos values from IBU-treated rats were then transformed into z-scores using the formula: $(\text{IBU value} - \text{SAL mean}) / \text{SAL standard deviation}$ . The resulting z-scores then represent how many standard deviations cFos expression in an IBU-treated animal deviated from the saline baseline within that same brain region. Positive z-score values indicate greater cFos expression relative to SAL conditions, whereas negative values indicate reduced activity relative to baseline. This approach allowed direct comparison of IBU-induced activity changes across brain regions with different baseline expression levels and variability. | <b>Regional activity patterns:</b> Although increased cFos expression was observed across multiple brain regions following 1x IBU administration, the largest increases were observed within DMS striosomes and the LHb. DMS striosomes displayed a z-score of approximately 16, indicating that cFos expression within this compartment was nearly 16 standard deviations greater than saline levels, while LHb cFos expression was approximately 4 standard deviations greater than saline levels following 1x IBU administration. Together, these findings suggest that although GHSR activation broadly alters neuronal activity across the brain, the strongest recruitment occurs within the DMS striosomal and LHb circuitry. |
| <b>Fig S4C</b><br>Effects<br>of IBU<br>dose on<br>daSNc<br>cFos<br>expressi<br>on                                       | <b>Main effects:</b> To determine whether increasing IBU doses altered neuronal activity within the dopaminergic neurons of the substantia nigra pars compacta (daSNc), cFos-positive cells were quantified exclusively within TH-positive dopaminergic neurons across SAL (rats=6), 0.5x IBU (rats=6), 1x IBU (rats=6), 2x IBU (rats=8), and 10x IBU (rats=6) conditions. Data was analyzed using an ordinary one-way ANOVA, followed by Tukey's multiple comparisons test. Analysis revealed a                                                                                                                                                                                                                                                                                                                                                                                                                                                                                                                                                                                                                                                                               | Post hoc comparisons: Tukey's multiple comparisons test revealed significantly greater daSNc cFos expression under the 10x IBU condition relative to SAL ( $p=0.00034$ ), 0.5x IBU ( $p=0.00038$ ), 1x IBU ( $p=0.00014$ ), and 2x IBU ( $p=0.00079$ ) conditions. No differences were observed between SAL, 0.5x, 1x, or 2x conditions (all $p>0.84$ ). Importantly, elevated daSNc cFos expression                                                                                                                                                                                                                                                                                                                                 |

|                                                                                                        |                                                                                                                                                                                                                                                                                                                                                                                                                                                                                                                                                                                                                                                                                                                                                                                                                                                   |                                                                                                                                                                                                                                                                                                                                                                                                                                                                                                                                            |
|--------------------------------------------------------------------------------------------------------|---------------------------------------------------------------------------------------------------------------------------------------------------------------------------------------------------------------------------------------------------------------------------------------------------------------------------------------------------------------------------------------------------------------------------------------------------------------------------------------------------------------------------------------------------------------------------------------------------------------------------------------------------------------------------------------------------------------------------------------------------------------------------------------------------------------------------------------------------|--------------------------------------------------------------------------------------------------------------------------------------------------------------------------------------------------------------------------------------------------------------------------------------------------------------------------------------------------------------------------------------------------------------------------------------------------------------------------------------------------------------------------------------------|
|                                                                                                        | <p>significant main effect of IBU dose on daSNc cFos expression (<math>F(4, 27)=9.626</math>, <math>p=5.7 \times 10^{-5}</math>), indicating that high levels of GHSR activation alters daSNc activity.</p>                                                                                                                                                                                                                                                                                                                                                                                                                                                                                                                                                                                                                                       | <p>emerged selectively under the highest IBU dose, coinciding with conditions in which striosomal activity was suppressed, suggesting that excessive GHSR activation recruits dopaminergic midbrain circuitry under high-dose conditions distinct from intermediate-dose striosomal activation.</p>                                                                                                                                                                                                                                        |
| <p><b>Fig S4D (left)</b></p> <p>Correlation between DMS striosomal and Lhb cFos expression</p>         | <p><b>Linear regression analysis:</b> To determine whether activation of DMS striosomes was associated with recruitment of the lateral habenula (Lhb), cFos expression within DMS striosomes was correlated with matched Lhb cFos counts obtained from the same rats across SAL (rats=7), 0.5x IBU (rats=6), 1x IBU (rats=6), 2x IBU (rats=6), and 10x IBU (rats=6) conditions. Linear regression analysis revealed a significant positive relationship between DMS striosomal and Lhb cFos expression (<math>F(1,29)=42.65</math>, <math>p&lt;0.0001</math>), with an <math>R^2</math> value of 0.5953, indicating that approximately 60% of the variance in Lhb activity could be explained by striosomal cFos expression. The resulting regression equation was <math>Y=0.09222x + 4.473</math>.</p>                                           | <p><b>Correlation analysis:</b> Pearson's correlation analysis further confirmed a strong positive correlation between DMS striosomal and Lhb cFos expression (<math>r=0.7715</math>, <math>p=3.8 \times 10^{-7}</math>; XY pairs=31). Together, these findings demonstrate that increased striosomal activation strongly correlates with elevated Lhb activity, supporting the recruitment of the striosomes → Lhb pathway following intermediate levels of GHSR activation.</p>                                                          |
| <p><b>Fig S4D (right)</b></p> <p>Correlation between DMS striosomal cFos expression and daSNc pPDH</p> | <p><b>Linear regression analysis:</b> To determine whether striosomal activation was associated with changes in dopaminergic substantia nigra pars compacta (daSNc) activity, cFos expression within DMS striosomes was correlated with matched daSNc pPDH counts obtained from the same rats across SAL (rats=6), 0.5x IBU (rats=6), 1x IBU (rats=6), 2x IBU (rats=7), and 10x IBU (rats=6) conditions. Linear regression analysis revealed a significant positive relationship between DMS striosomal cFos expression and daSNc pPDH levels (<math>F(1,29)=39.16</math>, <math>p&lt;0.0001</math>), with an <math>R^2</math> value of 0.5746, indicating that approximately 57% of the variance in daSNc pPDH expression could be explained by striosomal cFos levels. The resulting regression equation was <math>y=1.378x + 112.2</math>.</p> | <p><b>Correlation analysis:</b> Pearson's correlation analysis further confirmed a strong positive correlation between DMS striosomal cFos expression and daSNc pPDH levels (<math>r=0.7580</math>, 95% CI: 0.5519–0.8768, <math>p=7.9 \times 10^{-7}</math>; XY pairs=31). Together, these findings demonstrate that increased striosomal activation strongly correlates with elevated daSNc pPDH expression, suggesting that increased striosomal activity is associated with reduced activity of dopaminergic neurons in the daSNc.</p> |
| <p><b>Fig S4E</b></p> <p>Correlation between</p>                                                       | <p><b>Linear regression analysis:</b> To determine whether activity in Lhb was associated with altered daSNc activity, Lhb cFos expression was correlated with matched daSNc pPDH counts obtained from the same rats across all IBU dose conditions (rats = 6 per</p>                                                                                                                                                                                                                                                                                                                                                                                                                                                                                                                                                                             | <p><b>Correlation analysis:</b> Pearson's correlation analysis further confirmed a strong positive correlation between Lhb cFos expression and daSNc pPDH levels (<math>r=0.7033</math>, 95% CI: 0.4594–0.8485, <math>p&lt;0.0001</math>; XY pairs=30).</p>                                                                                                                                                                                                                                                                                |

|                                                                                |                                                                                                                                                                                                                                                                                                                                                                                                                                                                                                                                                                                                                                                     |                                                                                                                                                                                                                                                                                                                                                                                                                                                                                                                                                                                                                                                                       |
|--------------------------------------------------------------------------------|-----------------------------------------------------------------------------------------------------------------------------------------------------------------------------------------------------------------------------------------------------------------------------------------------------------------------------------------------------------------------------------------------------------------------------------------------------------------------------------------------------------------------------------------------------------------------------------------------------------------------------------------------------|-----------------------------------------------------------------------------------------------------------------------------------------------------------------------------------------------------------------------------------------------------------------------------------------------------------------------------------------------------------------------------------------------------------------------------------------------------------------------------------------------------------------------------------------------------------------------------------------------------------------------------------------------------------------------|
| LHb cFos expression and daSNc pPDH levels                                      | group). Linear regression analysis revealed a significant positive relationship between LHb cFos expression and daSNc pPDH levels ( $F(1,28)=27.40$ , $p<0.0001$ ), with an $R^2$ value of 0.4946, indicating that approximately 49% of the variance in daSNc pPDH expression could be explained by LHb activity. The resulting regression equation was $Y = 10.98x + 98.86$ .                                                                                                                                                                                                                                                                      | Together, these findings suggest that increased LHb recruitment is associated with increased pPDH expression within the daSNc, supporting the striosome → LHb → daSNc pathway following GHSR activation.                                                                                                                                                                                                                                                                                                                                                                                                                                                              |
| <b>Fig S4F</b><br>Correlation between DMS striosomal and daSNc cFos expression | <b>Linear regression analysis:</b> To determine whether activation of DMS striosomes was directly associated with activity in daSNc, cFos expression within DMS striosomes was correlated with matched daSNc cFos counts obtained from the same rats across all IBU dose conditions (rats=6 per group). Linear regression analysis revealed no significant relationship between DMS striosomal and daSNc cFos expression ( $F(1,28) = 1.916$ , $p=0.1772$ ). The resulting regression equation was $Y = -0.03816X + 10.47$ .                                                                                                                        | <b>Correlation analysis:</b> Pearson's correlation analysis further confirmed the absence of a significant relationship between DMS striosomal and daSNc cFos expression ( $r = -0.2531$ , 95% CI: -0.5621 to 0.1179, $p = 0.1771$ ; XY pairs = 30). Together, these data suggest that increased striosomal recruitment is not directly associated with increased daSNc neuronal activation and instead support a model in which elevated GHSR activation suppresses striosomal activity while indirectly recruiting dopaminergic midbrain circuitry through downstream pathways.                                                                                     |
| <b>Fig S4G</b><br>Effects of IBU dose on ARC cFos expression                   | <b>Main effects:</b> To determine whether increasing IBU doses altered activation of feeding-related hypothalamic circuitry, cFos-positive cells were quantified within the arcuate nucleus (ARC) across SAL (rats=10), 0.5x IBU (rats=7), 1x IBU (rats=10), 2x IBU (rats=6), and 10x IBU (rats=6) conditions. Group comparisons were analyzed using an ordinary one-way ANOVA followed by Tukey's multiple comparisons test. Analysis revealed a significant main effect of IBU dose on ARC cFos expression ( $F(4,34)=7.887$ , $p=0.000131$ ), indicating that high levels of GHSR activation alter recruitment of hypothalamic feeding circuitry | <b>Post hoc comparisons:</b> Tukey's multiple comparisons test revealed significantly greater ARC cFos expression under the 10x IBU condition relative to SAL ( $p=0.000135$ ), 0.5x IBU ( $p=0.000231$ ), 1x IBU ( $p=0.0121$ ), and 2x IBU ( $p = 0.0329$ ) conditions. No differences were observed between SAL, 0.5x, 1x, or 2x conditions (all $p>0.36$ ). Importantly, increased ARC activity was only observed at the highest IBU dose, coinciding with the same high-dose conditions that produced robust feeding behavior in the home cage. Together, these findings suggest that hypothalamic feeding circuits are primarily recruited under high levels of |

|                                                                              |                                                                                                                                                                                                                                                                                                                                                                                                                                                                                                                                                                                                                                                                                                                                                                                                                                                                                                                                                                    |                                                                                                                                                                                                                                                                                                                                                                                                                                                                                                                                                                                                                                                                                                                                                                                                                                                                                                                                                                       |
|------------------------------------------------------------------------------|--------------------------------------------------------------------------------------------------------------------------------------------------------------------------------------------------------------------------------------------------------------------------------------------------------------------------------------------------------------------------------------------------------------------------------------------------------------------------------------------------------------------------------------------------------------------------------------------------------------------------------------------------------------------------------------------------------------------------------------------------------------------------------------------------------------------------------------------------------------------------------------------------------------------------------------------------------------------|-----------------------------------------------------------------------------------------------------------------------------------------------------------------------------------------------------------------------------------------------------------------------------------------------------------------------------------------------------------------------------------------------------------------------------------------------------------------------------------------------------------------------------------------------------------------------------------------------------------------------------------------------------------------------------------------------------------------------------------------------------------------------------------------------------------------------------------------------------------------------------------------------------------------------------------------------------------------------|
|                                                                              |                                                                                                                                                                                                                                                                                                                                                                                                                                                                                                                                                                                                                                                                                                                                                                                                                                                                                                                                                                    | GHSR activation associated with increased food consumption.                                                                                                                                                                                                                                                                                                                                                                                                                                                                                                                                                                                                                                                                                                                                                                                                                                                                                                           |
| <b>Fig S4H</b><br>Correlation between DMS striosomal and ARC cFos expression | <b>Linear regression analysis:</b> To determine whether activation of DMS striosomes was associated with recruitment of hypothalamic feeding circuitry, cFos expression within DMS striosomes was correlated with cFos counts in ARC obtained from the same rats across all IBU dose conditions (rats=6 per group). Linear regression analysis revealed no significant relationship between DMS striosomal and ARC cFos expression ( $F(1,30)=0.1959$ , $p=0.6613$ ), with an $R^2$ value of 0.00648. The resulting regression equation was $y = -0.03074x + 51.44$ .                                                                                                                                                                                                                                                                                                                                                                                              | <b>Correlation analysis:</b> Pearson's correlation analysis further confirmed the absence of a significant relationship between DMS striosomal and ARC cFos expression ( $r = -0.0805$ , 95% CI: -0.4175 to 0.2759, $p = 0.6613$ ; XY pairs = 32). Together, these findings suggest that recruitment of DMS striosomal circuitry and hypothalamic feeding circuitry occurs under distinct GHSR activation states and are not directly coupled across individual rats.                                                                                                                                                                                                                                                                                                                                                                                                                                                                                                 |
| <b>Fig S5D</b><br>Time-dependent effects of 2x IBU on striosomal activity    | <b>Main effects:</b> To further characterize the temporal dynamics of intermediate-dose Ibutamoren administration, in vivo calcium imaging was analyzed independently within the 2x IBU condition across baseline, 30, 60, 120, 180, 240, and 300 min time points. Recordings were obtained from rats=4 (fields of view=6), and data were analyzed using a repeated-measures one-way ANOVA with Tukey's multiple comparisons test. Because individual rats displayed different baseline numbers of active cells, data were normalized to each recording's baseline activity by calculating the change in active cells relative to the 0 hr condition at each subsequent time point, for non-normalized data see <b>fig. S5E</b> . Analysis revealed a significant main effect of time on striosomal activity ( $F(2.552, 12.76)=15.52$ , $p=0.0002$ ), indicating that intermediate-dose IBU dynamically modulates striosomal activity across the recording period | <b>Post hoc comparisons:</b> Post hoc multiple comparisons revealed that striosomal activity was significantly elevated at 2 hours relative to the baseline (0 vs 2 hr, $p=0.0094$ ), supporting the conclusion that 2x IBU produces peak striosomal activation approximately 2 hours following administration. Activity at 2 hours was also significantly greater than later time points at 4 hour ( $p=0.0001$ ) and 5 hour ( $p=0.0013$ ), indicating that striosomal activation progressively declined following the 2 hr peak. No differences were observed between baseline and earlier time points at 0.5 or 1 hour (all $p>0.70$ ), supporting a delayed onset of IBU-mediated striosomal activation consistent with the pharmacokinetic profile of the compound. Together, these findings validate the use of the 2 hr post-injection window for subsequent behavioral experiments and support the later 3.5 hr perfusion time point used for cFos analysis. |
| <b>Fig S5E (left)</b><br>Time-dependent effects of IBU dose on               | <b>Main effects:</b> To determine how striosomal calcium activity changed over time following IBU administration, in vivo calcium imaging was performed longitudinally following 2x and 10x IBU administration. Calcium dynamics were monitored at baseline, 0.5, 1, 2, 3, 4, 5, and 6 hr post-injection and analyzed using a mixed-effects model. Analysis revealed a significant main effect of time (mixed-                                                                                                                                                                                                                                                                                                                                                                                                                                                                                                                                                     | <b>Post hoc comparisons:</b> Tukey's multiple-comparisons test revealed that striosomal activity increased during the later recording period relative to baseline. Activity at 4 hr was significantly elevated compared with baseline ( $p=0.0172$ ), and activity at 5 hr remained significantly greater than baseline ( $p=0.0037$ ). In addition, activity at 5 hr                                                                                                                                                                                                                                                                                                                                                                                                                                                                                                                                                                                                 |

|                                                                                                          |                                                                                                                                                                                                                                                                                                                                                                                                                                                                                                                                                                                                                                                                                                                       |                                                                                                                                                                                                                                                                                                                                                                                                                                                                                                                                                                                                                                                                                                                                                                                                                                                                                                            |
|----------------------------------------------------------------------------------------------------------|-----------------------------------------------------------------------------------------------------------------------------------------------------------------------------------------------------------------------------------------------------------------------------------------------------------------------------------------------------------------------------------------------------------------------------------------------------------------------------------------------------------------------------------------------------------------------------------------------------------------------------------------------------------------------------------------------------------------------|------------------------------------------------------------------------------------------------------------------------------------------------------------------------------------------------------------------------------------------------------------------------------------------------------------------------------------------------------------------------------------------------------------------------------------------------------------------------------------------------------------------------------------------------------------------------------------------------------------------------------------------------------------------------------------------------------------------------------------------------------------------------------------------------------------------------------------------------------------------------------------------------------------|
| raw striosomal calcium activity                                                                          | effects model: $F(7,71)=3.532$ , $p=0.0026$ ), indicating that striosomal activity changed dynamically across the recording period. In contrast, there was no significant main effect of IBU dose ( $F(1,10)=0.8866$ , $p=0.3686$ ), suggesting that when averaged across all time points, overall activity did not differ between the 2x and 10x IBU groups. Rats=4, fields of view=6.                                                                                                                                                                                                                                                                                                                               | was significantly greater than activity at 2 hr ( $p=0.0276$ ). No other pairwise comparisons reached statistical significance. Together, these findings indicate that striosomal activity gradually increased over time following IBU administration, reaching maximal levels approximately 4–5 hr after injection.                                                                                                                                                                                                                                                                                                                                                                                                                                                                                                                                                                                       |
| <b>Fig S5E (right)</b><br>Time-dependent effects of acyl-ghrelin dose on raw striosomal calcium activity | <b>Main effects:</b> To determine whether low and high acyl-ghrelin doses differentially modulate raw striosomal calcium activity across time, in vivo calcium imaging was performed following administration of 86 (rats=3) or 4.3 ug/kg (rats=2) acyl-ghrelin. Calcium dynamics were monitored longitudinally across 5, 10, 15, 30, 60, and 120 min time points. Data were analyzed using a mixed-effects model. Analysis revealed a significant interaction between time and ghrelin dose ( $F(5, 17)=4.927$ , $p=0.0057$ ), indicating that the temporal dynamics of striosomal activity differed between aGHR doses. There was also a significant main effect of ghrelin dose ( $F(1, 17)=7.187$ , $p=0.0158$ ). |                                                                                                                                                                                                                                                                                                                                                                                                                                                                                                                                                                                                                                                                                                                                                                                                                                                                                                            |
| <b>Fig S5F (left)</b><br>aGHR-induced feeding in home cage                                               | <b>Main effects:</b> To determine whether acyl-ghrelin dose-dependently modulates feeding behavior, food consumption in the home cage was measured 4 hr following administration of increasing aGHR doses. Food intake was compared across SAL, 125 ug/kg, 86 ug/kg, 26 ug/kg, 8.6 ug/kg, and 4.3 ug/kg conditions using a repeated-measures one-way ANOVA. Analysis revealed a significant main effect of aGHR dose on food consumption ( $F(2.508,17.56)=9.543$ , $p=0.0009$ ), indicating that aGHR dose-dependently increases feeding behavior.                                                                                                                                                                   | <b>Post hoc comparisons:</b> Tukey's multiple comparisons test revealed that food consumption was significantly increased under higher doses 125 ug/kg ( $p=0.0008$ ), 86 ug/kg ( $p=0.0063$ ), and 26 ug/kg ( $p=0.0292$ ) acyl-ghrelin conditions relative to SAL. In contrast, lower doses did not significantly alter feeding behavior (SAL vs 8.6 ug/kg, $p=0.3462$ ; SAL vs 4.3 ug/kg, $p=0.2732$ ). The highest dose tested (125 ug/kg) also produced significantly greater food intake than the lowest dose condition (4.3 ug/kg, $p=0.0087$ ) and modestly greater feeding relative to the 86 ug/kg condition ( $p=0.0374$ ). No additional differences were observed between intermediate and lower doses (all $p>0.10$ ). Together, these findings demonstrate that acyl-ghrelin dose-dependently increases food consumption, with robust effects emerging primarily at moderate-to-high doses. |

|                                                                                                      |                                                                                                                                                                                                                                                                                                                                                                                                                                                                                                                                                                                                                                                                                                                                                                                                                                                                                                                                                                                                                                                                                                                                                                                                                                                           |                                                                                                                                                                                                                                                                                                                                                                                                                                                                                                                                                                                                                                                                                                                                                                                                                                                                                                                                                                                                                                                                                                                                                                                                                                                                                                                                                                                                                                                                                                                                                                                                                                                                                                                                                                                                                                                                                                                                                                                                                                               |
|------------------------------------------------------------------------------------------------------|-----------------------------------------------------------------------------------------------------------------------------------------------------------------------------------------------------------------------------------------------------------------------------------------------------------------------------------------------------------------------------------------------------------------------------------------------------------------------------------------------------------------------------------------------------------------------------------------------------------------------------------------------------------------------------------------------------------------------------------------------------------------------------------------------------------------------------------------------------------------------------------------------------------------------------------------------------------------------------------------------------------------------------------------------------------------------------------------------------------------------------------------------------------------------------------------------------------------------------------------------------------|-----------------------------------------------------------------------------------------------------------------------------------------------------------------------------------------------------------------------------------------------------------------------------------------------------------------------------------------------------------------------------------------------------------------------------------------------------------------------------------------------------------------------------------------------------------------------------------------------------------------------------------------------------------------------------------------------------------------------------------------------------------------------------------------------------------------------------------------------------------------------------------------------------------------------------------------------------------------------------------------------------------------------------------------------------------------------------------------------------------------------------------------------------------------------------------------------------------------------------------------------------------------------------------------------------------------------------------------------------------------------------------------------------------------------------------------------------------------------------------------------------------------------------------------------------------------------------------------------------------------------------------------------------------------------------------------------------------------------------------------------------------------------------------------------------------------------------------------------------------------------------------------------------------------------------------------------------------------------------------------------------------------------------------------------|
| <p><b>Fig S5F (right)</b></p> <p>Time-dependent effects of acyl-ghrelin dose on food consumption</p> | <p><b>Main effects:</b> To determine whether aGHR dose differentially modulates the temporal dynamics of feeding behavior, cumulative food consumption in the home cage was measured hourly for 4 hours following administration of SAL, 4.3 ug/kg, 8.6 ug/kg, 26 ug/kg, 86 ug/kg, or 125 ug/kg aGHR. Because all rats (rats=8) received every dose, data were analyzed using a two-way repeated-measures ANOVA. Analysis revealed a significant main effect of time (<math>F(1.887,13.21)=98.61</math>, <math>p=0.00000014</math>), indicating that all rats, including saline controls, progressively consumed food across the recording period. There was also a significant main effect of aGHR dose (<math>F(2.781,19.47)=8.521</math>, <math>p=0.00099</math>), as well as a significant interaction between time and aGHR dose (<math>F(4.287,30.01)=5.577</math>, <math>p=0.00146</math>), indicating that both the magnitude and temporal dynamics of feeding behavior differed depending on aGHR concentration. Together, these findings demonstrate that food consumption naturally increased across time under all conditions, while higher levels of GHSR activation accelerated and amplified feeding behavior relative to lower doses.</p> | <p><b>Post hoc comparisons:</b> Tukey's post hoc multiple comparisons revealed that feeding behavior differed primarily at higher aGHR doses. At 1 hour following administration, only the highest dose (125 ug/kg) significantly increased food consumption relative to SAL (<math>p=0.0200</math>), while all lower doses remained comparable to SAL (all <math>p&gt;0.50</math>), indicating a rapid orexigenic effect uniquely at the highest dose. Similarly, at 2 hours, only the 125 ug/kg condition remained significantly elevated relative to SAL (<math>p=0.0163</math>). By 3 hours, both high-dose conditions (86 and 125 ug/kg) displayed significantly greater food consumption relative to SAL (86 ug/kg: <math>p=0.00019</math>; 125 ug/kg: <math>p=0.0026</math>), whereas lower doses remained unchanged (all <math>p&gt;0.11</math>). At 4 hours, the three highest doses (26, 86, and 125 ug/kg) significantly increased cumulative food consumption relative to SAL conditions (26 ug/kg: <math>p=0.0292</math>; 86 ug/kg: <math>p=0.0063</math>; 125 ug/kg: <math>p=0.00080</math>), while lower doses still failed to alter feeding behavior (all <math>p&gt;0.27</math>). Additional comparisons further demonstrated that the highest dose (125 ug/kg) consistently produced greater food consumption than lower doses across multiple time points, including relative to 4.3 ug/kg at 1 hour (<math>p=0.00024</math>), 2 hours (<math>p=0.0146</math>), 3 hours (<math>p=0.00020</math>), and 4 hours (<math>p=0.0087</math>). Collectively, these findings indicate that increasing aGHR doses not only increase total food intake, but also accelerate the onset of feeding behavior, with the highest doses producing rapid consummatory responses within the first hour while lower doses produce delayed or minimal effects. Importantly, these findings support previous observations that robust orexigenic effects emerge primarily under high levels of GHSR activation by IBU and activation of ARC.</p> |
| <p><b>Fig S5G</b></p> <p>Effects of GHSR</p>                                                         | <p><b>Main effects:</b> To determine whether feeding behavior differed as a function of GHSR activation mode or dose, food consumption in the home cage was compared across SAL, low-dose, and high-dose conditions following either IBU or aGHR</p>                                                                                                                                                                                                                                                                                                                                                                                                                                                                                                                                                                                                                                                                                                                                                                                                                                                                                                                                                                                                      | <p><b>Post hoc comparisons:</b> Post hoc multiple comparisons revealed no differences between saline conditions across activation modes (SAL:IBU vs SAL:aGHR, <math>p&gt;0.9999</math>), indicating</p>                                                                                                                                                                                                                                                                                                                                                                                                                                                                                                                                                                                                                                                                                                                                                                                                                                                                                                                                                                                                                                                                                                                                                                                                                                                                                                                                                                                                                                                                                                                                                                                                                                                                                                                                                                                                                                       |

|                                                                                                          |                                                                                                                                                                                                                                                                                                                                                                                                                                                                                                                                                                                                                                                                                                                                                                                                                                                                                                                                                                                                                                                                                                                                                                               |                                                                                                                                                                                                                                                                                                                                                                                                                                                                                                                                                                                                                                                                                                                                                                               |
|----------------------------------------------------------------------------------------------------------|-------------------------------------------------------------------------------------------------------------------------------------------------------------------------------------------------------------------------------------------------------------------------------------------------------------------------------------------------------------------------------------------------------------------------------------------------------------------------------------------------------------------------------------------------------------------------------------------------------------------------------------------------------------------------------------------------------------------------------------------------------------------------------------------------------------------------------------------------------------------------------------------------------------------------------------------------------------------------------------------------------------------------------------------------------------------------------------------------------------------------------------------------------------------------------|-------------------------------------------------------------------------------------------------------------------------------------------------------------------------------------------------------------------------------------------------------------------------------------------------------------------------------------------------------------------------------------------------------------------------------------------------------------------------------------------------------------------------------------------------------------------------------------------------------------------------------------------------------------------------------------------------------------------------------------------------------------------------------|
| activation mode and dose on food consumption                                                             | administration. Grams of chow consumed were analyzed using a two-way ANOVA with dose and GHSR activation mode as factors. There was a significant main effect of dose ( $F(2, 75)=8.460$ , $p=0.0005$ ), whereas no significant main effect of GHSR activation mode was observed ( $F(1, 75)=0.1140$ , $p=0.7366$ ), demonstrating that feeding behavior was primarily determined by the magnitude of GHSR activation rather than the specific agonist used                                                                                                                                                                                                                                                                                                                                                                                                                                                                                                                                                                                                                                                                                                                   | comparable baseline feeding behavior between treatment paradigms. Similarly, no differences were observed between low-dose IBU and low-dose acyl-ghrelin conditions ( $p=0.9941$ ), nor between high-dose IBU and high-dose acyl-ghrelin conditions ( $p>0.9999$ ), further supporting similar feeding responses regardless of GHSR activation mode. Importantly, high-dose IBU significantly increased food consumption relative to low-dose IBU ( $p=0.0405$ ), whereas low-dose conditions did not differ from saline controls (all $p>0.98$ ). Together, these findings demonstrate that feeding behavior is driven by the magnitude of GHSR activation rather than the agonist used, with robust increases in food intake emerging primarily under high-dose conditions. |
| <p><b>Fig S6E</b></p> <p>Effects of striosomal chemogenetic manipulation on striatal pPDH expression</p> | <p><b>Main effects:</b> To determine whether chemogenetic manipulation of striosomal neurons alters pPDH expression within the dorsal striatum, pPDH-positive cells were quantified following Cre-dependent DREADD manipulation of striosomal neurons. Quantification was restricted to MOR-positive striosomal ROIs and only within neurons expressing the DREADD virus, identified by either HA-tag or mCherry labeling depending on the viral construct. To ensure pPDH signal localization within neuronal somas, only pPDH-positive signal overlapping with the soma marker NeuroTrace was included in the analysis. Experimental groups included SAL (rats=7), IBU (rats=6), Inh IBU (inhibitory hM4Di + CNO + IBU; rats=7), Inh SAL (hM4Di + CNO + SAL; rats=6), Exc SAL (excitatory hM3Dq + CNO + SAL; rats=6), Exc IBU (excitatory + CNO + IBU; rats=6), and WT + CNO saline controls (CNO SAL; rats=6). Group comparisons were analyzed using a one-way ANOVA followed by Tukey's multiple comparisons test. Analysis revealed a significant main effect of treatment group on striatal pPDH expression (<math>F(6,37)=8.496</math>, <math>p=0.0000079</math>).</p> |                                                                                                                                                                                                                                                                                                                                                                                                                                                                                                                                                                                                                                                                                                                                                                               |
| <p><b>Fig S6F</b></p> <p>striosomes pPDH inhibition</p>                                                  | <p><b>Post hoc comparisons: inhibitory manipulation:</b> Tukey's multiple comparisons test showed that inhibition of striosomal neurons significantly increased pPDH expression relative to SAL controls (SAL vs Inh IBU, <math>p=0.00159</math>; SAL vs Inh SAL, <math>p=0.01225</math>). Similarly, both inhibitory groups also showed significantly greater pPDH expression relative to the 2x IBU condition (IBU vs Inh IBU, <math>p=0.00039</math>; IBU vs Inh SAL, <math>p=0.00319</math>). The Inh IBU and Inh SAL groups did not differ from one another (<math>p=0.9977</math>), indicating that chemogenetic inhibition of striosomal neurons alone was sufficient to increase pPDH expression independent of IBU administration. Together,</p>                                                                                                                                                                                                                                                                                                                                                                                                                     |                                                                                                                                                                                                                                                                                                                                                                                                                                                                                                                                                                                                                                                                                                                                                                               |

|                                                                         |                                                                                                                                                                                                                                                                                                                                                                                                                                                                                                                                                                                                                                                                                                                                                                                |  |
|-------------------------------------------------------------------------|--------------------------------------------------------------------------------------------------------------------------------------------------------------------------------------------------------------------------------------------------------------------------------------------------------------------------------------------------------------------------------------------------------------------------------------------------------------------------------------------------------------------------------------------------------------------------------------------------------------------------------------------------------------------------------------------------------------------------------------------------------------------------------|--|
|                                                                         | these findings are consistent with previous reports demonstrating that DREADD-mediated neuronal inhibition increases pPDH expression, further supporting pPDH as a marker of reduced neuronal activity within the striosomal circuit.                                                                                                                                                                                                                                                                                                                                                                                                                                                                                                                                          |  |
| <b>Fig S6G</b><br>striosomes pPDH excitation                            | <b>Post hoc comparisons: excitatory manipulation:</b> In contrast to inhibitory manipulation, excitatory chemogenetic activation of striosomal neurons did not alter pPDH expression relative to SAL conditions (Exc SAL vs SAL, $p=0.99997$ ; Exc IBU vs SAL, $p=0.99999$ ). Similarly, neither excitatory group differed from the 2x IBU condition (IBU vs Exc SAL, $p=0.9760$ ; IBU vs Exc IBU, $p=0.9995$ ), and Exc SAL and Exc IBU groups did not differ from one another ( $p = 0.99938$ ). Together, these findings demonstrate that excitatory chemogenetic activation of striosomal neurons does not increase pPDH expression, indicating that pPDH recruitment is selectively associated with neuronal inhibition rather than increased striosomal activity         |  |
| <b>Fig S6H</b><br>WT control comparisons for striosomal pPDH expression | <b>Post hoc comparisons- WT controls:</b> CNO SAL rats that received CNO alone did not differ from SAL controls ( $p=0.9983$ ), confirming that CNO administration alone did not alter pPDH expression in the absence of DREADD expression. In contrast, both inhibitory manipulation groups displayed significantly greater pPDH expression relative to CNO SAL controls (Inh IBU vs CNO SAL, $p=0.000565$ ; Inh SAL vs CNO SAL, $p=0.00441$ ). Neither excitatory manipulation group differed from CNO SAL controls (Exc SAL vs CNO SAL, $p=0.98841$ ; Exc IBU vs CNO SAL, $p=0.9999$ ), further supporting that increased pPDH expression was specific to inhibitory chemogenetic manipulation of striosomal neurons.                                                       |  |
| <b>Fig S6I</b><br>striosomes pPDH post hoc                              | <b>Post hoc comparisons inhibitory versus excitatory manipulation:</b> Direct comparisons between inhibitory and excitatory manipulation groups revealed significantly greater pPDH expression following striosomal inhibition relative to excitation (Inh IBU vs Exc SAL, $p=0.0053$ ; Inh IBU vs Exc IBU, $p=0.0014$ ; Inh SAL vs Exc SAL, $p=0.0323$ ; Inh SAL vs Exc IBU, $p=0.0103$ ). Together, these findings demonstrate that inhibitory and excitatory manipulation of striosomal neurons produce distinct pPDH expression profiles, with elevated pPDH recruitment occurring selectively following neuronal inhibition.                                                                                                                                              |  |
| <b>Fig S7B-C</b>                                                        | Pairwise comparisons between experimental groups were performed using two-sample (unpaired) t-tests for unequal variances. Each column represents a task condition—simple tasks (Food alone, Toy alone, Light alone) on the left and complex tasks (Food+light, Toy+light) on the right. Each row corresponds to a specific group comparison (e.g., CNO Saline vs CNO IBU, CNO Saline vs Inhibitory IBU, etc.). For each cell, $t(df)$ and $p$ -values are shown, with arrows indicating the direction of change relative to the first group in the comparison. Blue shading marks statistically significant effects ( $p<0.05$ ).                                                                                                                                             |  |
| <b>Fig S8D</b><br>inhibition post-hocs                                  | <b>Effects of striosomal inhibition across the striosome→LHb→daSNc circuit</b><br><b>Post hoc comparisons of inhibitory manipulation:</b> Across all analyzed regions, striosomal inhibition abolished the effects of 2x IBU administration. Within striosomes, both inhibitory groups displayed significantly reduced cFos expression relative to the 2x IBU condition and returned to SAL-like levels (all $p<0.002$ ). Similarly, within the LHb, inhibitory manipulation blocked IBU-induced cFos recruitment, with both inhibitory groups differing significantly from the 2x IBU condition while remaining comparable to SAL controls (all $p < 0.0001$ ). In contrast, inhibitory manipulation reduced recruitment of the daSNc pPDH profile, as both inhibitory groups |  |

|                                                     |                                                                                                                                                                                                                                                                                                                                                                                                                                                                                                                                                                                                                                                                                                                                                                                                                                                                                                                                                                                                                                                                                                                                                                                                                                                                 |  |
|-----------------------------------------------------|-----------------------------------------------------------------------------------------------------------------------------------------------------------------------------------------------------------------------------------------------------------------------------------------------------------------------------------------------------------------------------------------------------------------------------------------------------------------------------------------------------------------------------------------------------------------------------------------------------------------------------------------------------------------------------------------------------------------------------------------------------------------------------------------------------------------------------------------------------------------------------------------------------------------------------------------------------------------------------------------------------------------------------------------------------------------------------------------------------------------------------------------------------------------------------------------------------------------------------------------------------------------|--|
|                                                     | displayed significantly lower pPDH expression relative to the 2x IBU condition (all $p < 0.0001$ ) and did not differ from SAL conditions. Together, these findings demonstrate that chemogenetic inhibition of striosomal neurons blocks downstream recruitment of the striosome→LHb→daSNc circuit following intermediate GHSR activation.                                                                                                                                                                                                                                                                                                                                                                                                                                                                                                                                                                                                                                                                                                                                                                                                                                                                                                                     |  |
| <b>Fig S8E</b><br>striosomal excitation post-hocs   | <b>Effects of excitatory chemogenetic manipulation across the striosome→LHb→daSNc circuit</b><br>Striosomal excitation phenocopied the effects of intermediate-dose IBU administration across all analyzed regions. Within striosomes, both excitatory groups displayed significantly greater cFos expression relative to SAL controls while remaining comparable to the 2x IBU condition. Similarly, within the LHb, excitatory manipulation increased cFos expression to levels comparable to 2x IBU rats, indicating recruitment of downstream circuit activity. Within the daSNc, both excitatory groups displayed significantly elevated pPDH expression relative to inhibitory manipulation groups and SAL controls, consistent with increased recruitment of the daSNc inactivity profile observed following intermediate-dose GHSR activation. Excitatory groups did not differ from one another across analyzed regions, indicating that chemogenetic excitation alone was sufficient to recapitulate the effects of IBU on downstream circuit recruitment. Together, these findings demonstrate that selective excitation of striosomal neurons is sufficient to mimic intermediate-dose GHSR-mediated activation of the striosome→LHb→daSNc circuit. |  |
| <b>Fig S8F</b><br>striosomal manipulation post-hocs | <b>Comparison of inhibitory versus excitatory chemogenetic manipulation across the striosome→LHb→daSNc circuit</b><br><b>Post hoc comparisons of inhibitory versus excitatory manipulation:</b> Direct comparisons between inhibitory and excitatory manipulation groups revealed opposing activity profiles across all analyzed regions. Within both striosomes and the LHb, excitatory manipulation produced significantly greater cFos expression relative to inhibitory manipulation groups (all $p < 0.01$ ). In contrast, within the daSNc, excitatory manipulation resulted in significantly greater pPDH expression relative to inhibitory groups (all $p < 0.0001$ ), consistent with differential recruitment of downstream dopaminergic activity states. Together, these findings demonstrate that inhibitory and excitatory manipulation of striosomal neurons produce opposing effects across the striosome→LHb→daSNc circuit.                                                                                                                                                                                                                                                                                                                     |  |
| <b>Fig S8G</b><br>striosomal manipulation with WT   | <b>WT control comparisons across the striosome→LHb→daSNc circuit</b><br>WT SAL rats receiving CNO alone did not differ from SAL controls across striosomal cFos expression, LHb cFos expression, or daSNc pPDH expression (all $p > 0.48$ ), confirming that CNO administration alone did not alter circuit activity in the absence of DREADD expression. Across all analyzed regions, inhibitory manipulation groups produced activity comparable to WT SAL controls, consistent with suppression of IBU-mediated circuit recruitment. In contrast, both excitatory manipulation groups displayed significantly greater striosomal and LHb cFos expression relative to WT SAL controls while also exhibiting significantly elevated daSNc pPDH expression (all $p < 0.02$ ). Lastly, there is no significant difference in striosomal cFos between Cre+ IBU and IBU, indicating that viral expression and surgical procedures did not alter striosomal response to IBU. Together, these findings demonstrate that excitatory manipulation mimics intermediate-dose GHSR-mediated recruitment of the striosome→LHb→daSNc circuit, whereas inhibitory manipulation blocks downstream circuit activation and returns activity to WT-like conditions.              |  |
| <b>Fig S9N (top)</b>                                | <b>Main effects:</b> To determine whether GHSR-mediated striosomal recruitment preferentially engages specific downstream output pathways,                                                                                                                                                                                                                                                                                                                                                                                                                                                                                                                                                                                                                                                                                                                                                                                                                                                                                                                                                                                                                                                                                                                      |  |

|                                                                                                          |                                                                                                                                                                                                                                                                                                                                                                                                                                                                                                                                                                                                                                                                                                                                                                                                                                                                                                                                                                                                                                                                                                                                                                                              |  |
|----------------------------------------------------------------------------------------------------------|----------------------------------------------------------------------------------------------------------------------------------------------------------------------------------------------------------------------------------------------------------------------------------------------------------------------------------------------------------------------------------------------------------------------------------------------------------------------------------------------------------------------------------------------------------------------------------------------------------------------------------------------------------------------------------------------------------------------------------------------------------------------------------------------------------------------------------------------------------------------------------------------------------------------------------------------------------------------------------------------------------------------------------------------------------------------------------------------------------------------------------------------------------------------------------------------|--|
| <p>Comparison of RV-mCherry labeling across monosynaptic tracing pathways</p>                            | <p>monosynaptic rabies tracing was performed across two independent tracing paradigms: Strio→daSNc (rats = 2) and Strio→GPI→LHb (rats = 3). The number of RV-mCherry-positive striosomal neurons within MOR-positive ROIs was then quantified across tracing conditions. Group comparisons were analyzed using an unpaired two-tailed t-test. Analysis revealed no significant differences in the number of RV-mCherry-positive striosomal neurons between tracing conditions (<math>t = 0.3464</math>, <math>df=2.000</math>, <math>p=0.7621</math>). Comparable RV-mCherry labeling across tracing paradigms indicates that both monosynaptic tracing experiments produced similar levels of striosomal labeling efficiency. These findings suggest that subsequent differences in pathway-specific cFos recruitment are unlikely to reflect variability in rabies tracing efficiency or preferential labeling between tracing conditions.</p>                                                                                                                                                                                                                                             |  |
| <p><b>Fig S9N bottom</b><br/>Pathway-specific cFos recruitment across monosynaptic tracing paradigms</p> | <p><b>Main effects:</b> To determine whether GHSR-mediated striosomal recruitment preferentially engages specific downstream output pathways, the percentage of RV-mCherry-positive striosomal neurons co-expressing cFos was quantified following monosynaptic rabies tracing of the Strio→daSNc (rats = 2) and Strio→GPI→LHb (rats = 3) pathways. For each tracing condition, all RV-mCherry-positive striosomal neurons within MOR-positive ROIs were quantified, and the percentage co-expressing cFos was calculated. Group comparisons were analyzed using an unpaired two-tailed t-test. Analysis revealed significantly greater cFos co-labeling within the Strio→GPI→LHb tracing condition relative to the Strio→daSNc pathway (<math>t = 4.339</math>, <math>df = 2.474</math>, <math>p=0.0331</math>). The Strio→GPI→LHb pathway displayed substantially greater recruitment of cFos-positive RV-mCherry-labeled striosomal neurons compared to the direct Strio→daSNc pathway (52.90% vs 3.85%). These findings suggest that intermediate GHSR activation preferentially recruits the indirect Strio→GPI→LHb pathway rather than direct striosomal projections to the daSNc.</p> |  |
| <p><b>Fig S11A</b></p>                                                                                   | <p>Trajectory curvature was significantly reduced in the 2x group relative to saline controls (T-test: <math>t(120) = 3.621</math>, <math>p=0.0005</math>), with a smaller but still significant reduction at high-dose IBU (10x) (T-test: <math>t(90) = 2.368</math>, <math>p=0.0200</math>).</p>                                                                                                                                                                                                                                                                                                                                                                                                                                                                                                                                                                                                                                                                                                                                                                                                                                                                                           |  |
| <p><b>Fig S11B</b></p>                                                                                   | <p>Velocity also decreased significantly at 2x IBU (T-test: <math>t(120) = 2.891</math>, <math>p=0.0047</math>), but no difference was observed at 10x (T-test: <math>t(90) = 1.723</math>, <math>p=0.0884</math>).</p>                                                                                                                                                                                                                                                                                                                                                                                                                                                                                                                                                                                                                                                                                                                                                                                                                                                                                                                                                                      |  |

|                       |                                                                                                                                                                                                                                                                                                                                                                                                                                                                                                                                                                                                                                                                                                                                                                                                                                                                                                                                                                                                                                                                                                                                                                                                                                                                                                                                                                                                                                                                                          |  |
|-----------------------|------------------------------------------------------------------------------------------------------------------------------------------------------------------------------------------------------------------------------------------------------------------------------------------------------------------------------------------------------------------------------------------------------------------------------------------------------------------------------------------------------------------------------------------------------------------------------------------------------------------------------------------------------------------------------------------------------------------------------------------------------------------------------------------------------------------------------------------------------------------------------------------------------------------------------------------------------------------------------------------------------------------------------------------------------------------------------------------------------------------------------------------------------------------------------------------------------------------------------------------------------------------------------------------------------------------------------------------------------------------------------------------------------------------------------------------------------------------------------------------|--|
| <b>Fig S11C</b>       | Head–body angle was significantly increased at 2x IBU (t-test: $t(120) = -1.993$ , $p=0.0485$ ) but unchanged at 10X (T-test: $t(90) = -0.686$ , $p=0.4945$ ).                                                                                                                                                                                                                                                                                                                                                                                                                                                                                                                                                                                                                                                                                                                                                                                                                                                                                                                                                                                                                                                                                                                                                                                                                                                                                                                           |  |
| <b>Fig S11D and E</b> | <p>Pairwise comparisons between saline and IBU groups were performed using independent (unpaired) two-sample t-tests for unequal variances. The figure summarizes treatment effects on three behavioral features—curvature, velocity, and head–body angle—for two IBU doses (2x and 10x). The “Combined” row represents all tasks pooled together, while subsequent rows show results separated by individual task conditions (food alone, toy alone, light alone, food+light, and toy+light).</p> <p>Each cell displays the direction of change (arrow) in the IBU group relative to the saline group. Blue shading denotes statistically significant differences, with color intensity indicating the significance level (<math>p &lt; 0.05</math>, ** <math>p &lt; 0.01</math>, * <math>p &lt; 0.001</math>, ** * <math>p &lt; 0.0001</math> ****); grey shading indicates non-significant comparisons. Sample sizes for each analysis are shown within the matrix as the number of rats (<math>n_{S,a}</math>, <math>n_{IBU,a}</math>) and trials (<math>n_{S,t}</math>, <math>n_{IBU,t}</math>) included in the saline and IBU groups, respectively.</p>                                                                                                                                                                                                                                                                                                                            |  |
| Fig S12               | <p>To characterize the behavioral effects of ghrelin across different environmental contexts, we analyzed four key movement metrics: turn frequency (<math>&gt; 90^\circ</math>), mean absolute turn-angle, mean step length, and the Mean Squared Displacement (MSD) exponent. The integrated effect of ghrelin relative to saline was visualized in <b>fig. S12B</b> using a signed <math>-\log_{10}(p)</math> transformation, where the bar height represents the statistical significance (paired t-test) and the sign indicates the direction of change (positive for ghrelin <math>&gt;</math> saline, negative for saline <math>&gt;</math> ghrelin). In <b>fig. S12C</b>, the data is visualized using paired line plots to illustrate the degree of consistency across individual subjects within specific task conditions. Ghrelin treatment resulted in a significant reduction in mean step length (<math>p = 0.008</math>), indicated by the downward trajectory of the population mean (red line). Significant decreases were observed in both turn frequency (<math>p = 0.009</math>) and mean absolute turn-angle (<math>p = 0.011</math>). This reduction in turning behavior reflects a smoother, less tortuous path under ghrelin. The MSD exponent showed a significant increase (<math>p = 0.006</math>), suggesting that ghrelin shifts the movement dynamics from diffusive or constrained search patterns toward more super-diffusive, exploratory behavior.</p> |  |

|                 |                                                                                                                                                                                                                                                                                                                                                                                                                                                                                                                                                                                                                                                                                                                                                                                                                                                                                                                                                                                                                                                                                        |  |
|-----------------|----------------------------------------------------------------------------------------------------------------------------------------------------------------------------------------------------------------------------------------------------------------------------------------------------------------------------------------------------------------------------------------------------------------------------------------------------------------------------------------------------------------------------------------------------------------------------------------------------------------------------------------------------------------------------------------------------------------------------------------------------------------------------------------------------------------------------------------------------------------------------------------------------------------------------------------------------------------------------------------------------------------------------------------------------------------------------------------|--|
|                 | Paired comparisons between saline and ghrelin sessions were performed using two-tailed paired t-tests. All trajectories were smoothed using a 1D Gaussian filter prior to kinematic feature extraction to minimize tracking noise.                                                                                                                                                                                                                                                                                                                                                                                                                                                                                                                                                                                                                                                                                                                                                                                                                                                     |  |
| Fig S13A        | Trajectory curvature for Oprm1-cre rats was significantly reduced in the Exc SAL group relative to both saline and Inh IBU (One-way ANOVA: $F(2, 169) = 15.70, p=5.5 \times 10^{-7}$ ; Tukey's HSD: CNO SAL vs Exc SAL $p < 0.0001$ , Exc SAL vs Inh IBU $p < 0.0001$ ), while, no difference was observed between saline and Inh IBU (Tukey's HSD: CNO SAL vs Inh IBU $p = 0.9355$ ).                                                                                                                                                                                                                                                                                                                                                                                                                                                                                                                                                                                                                                                                                                 |  |
| Fig S13B        | Velocity was significantly lower in the Exc SAL group relative to both saline and Inh IBU (One-way ANOVA: $F(2, 169) = 19.56, p=2.3 \times 10^{-8}$ ; Tukey's HSD: CNO SAL vs Exc SAL $p = 0.0003$ , Exc SAL vs Inh IBU $p < 0.0001$ ), while, no difference was observed between saline and Inh IBU (Tukey's HSD: CNO SAL vs Inh IBU $p = 0.1396$ ).                                                                                                                                                                                                                                                                                                                                                                                                                                                                                                                                                                                                                                                                                                                                  |  |
| Fig S13C        | Head-body angle was significantly increased in the excitatory group compared to saline and Inh IBU (One-way ANOVA: $F(2, 169) = 5.0841, p = 0.0071$ ; Tukey's HSD: WT-SAL vs Exc SAL $p = 0.0231$ , Exc SAL vs Inh IBU $p = 0.0106$ ), but not different from inhibitory (Tukey's HSD: CNO SAL vs Inh IBU $p = 0.9981$ ).                                                                                                                                                                                                                                                                                                                                                                                                                                                                                                                                                                                                                                                                                                                                                              |  |
| <b>Fig S13D</b> | <p>Pairwise comparisons were performed using independent (unpaired) two-sample t-tests for unequal variances. The figure summarizes the effects of striatal modulation (inhibitory and excitatory) relative to the saline group on three behavioral features—curvature, velocity, and head-body angle—across different task conditions. Rows represent task types (the top “Combined” row includes all tasks pooled together, followed by individual task conditions: food alone, toy alone, light alone, food+light, and toy+light).</p> <p>Columns at the top indicate group comparisons (e.g., Sal vs Inh and Sal vs Exc) for each feature, while columns at the bottom indicate the features being compared. Vertical solid lines demarcate the boundaries between different features. Within each cell, arrows indicate the direction of change in the modulation group relative to the saline group. Blue shading denotes statistically significant differences, with color intensity reflecting the p-value threshold; grey cells represent non-significant (n.s.) results.</p> |  |

|                                                                                                            |                                                                                                                                                                                                                                                                                                                                                                                                                                                                                                                                                                                                                                                                                                                                                                                                                                                                                                                                                                                                   |                                                                                                                                                                                                                                                                                                                                                                                                                                                                                                                                                                                                                                                                                                                                                                                                                                                                                                                                                                                                                                                                                                                                                        |
|------------------------------------------------------------------------------------------------------------|---------------------------------------------------------------------------------------------------------------------------------------------------------------------------------------------------------------------------------------------------------------------------------------------------------------------------------------------------------------------------------------------------------------------------------------------------------------------------------------------------------------------------------------------------------------------------------------------------------------------------------------------------------------------------------------------------------------------------------------------------------------------------------------------------------------------------------------------------------------------------------------------------------------------------------------------------------------------------------------------------|--------------------------------------------------------------------------------------------------------------------------------------------------------------------------------------------------------------------------------------------------------------------------------------------------------------------------------------------------------------------------------------------------------------------------------------------------------------------------------------------------------------------------------------------------------------------------------------------------------------------------------------------------------------------------------------------------------------------------------------------------------------------------------------------------------------------------------------------------------------------------------------------------------------------------------------------------------------------------------------------------------------------------------------------------------------------------------------------------------------------------------------------------------|
|                                                                                                            | Sample sizes are shown within each cell for the number of rats (n_Inh,a, n_Exc,a) and trials (n_Inh,t, n_Exc,t) included in each comparison.                                                                                                                                                                                                                                                                                                                                                                                                                                                                                                                                                                                                                                                                                                                                                                                                                                                      |                                                                                                                                                                                                                                                                                                                                                                                                                                                                                                                                                                                                                                                                                                                                                                                                                                                                                                                                                                                                                                                                                                                                                        |
| <b>Fig S14B</b><br>Biotinylated ghrelin (BGHR) binding across DLS striosome and matrix compartments        | <b>Main effects:</b> To determine whether prior IBU administration alters subsequent ghrelin ligand binding within DLS striosome and matrix compartments, biotinylated ghrelin (BGHR) puncta density was quantified following administration of SAL (rats = 6), 0.5x IBU (rats = 6), 1x IBU (rats = 6), 2x IBU (rats = 6), and 10x IBU (rats = 6). Tissue sections were incubated ex vivo with BGHR to assess ligand binding density across striatal compartments. Group comparisons were analyzed using a two-way ANOVA followed by Tukey's multiple comparisons test. Analysis revealed a significant main effect of IBU dose ( $F(4,50) = 3.766$ , $p=0.0094$ ) and a significant main effect of compartment ( $F(1,50) = 57.35$ , $p<0.0001$ ), while the interaction between dose and compartment did not reach significance ( $F(4,50) = 2.260$ , $p = 0.0757$ ). These findings indicate that BGHR binding differs across DLS compartments and varies as a function of prior IBU exposure. | <b>Post hoc comparisons:</b> Tukey's multiple comparisons test confirmed significantly greater BGHR puncta density within SAL DLS striosomes relative to SAL matrix compartments ( $p < 0.0001$ ), indicating baseline enrichment of GHSR-associated ligand binding within DLS striosomal compartments. Similar compartment enrichment was observed under the 0.5x IBU condition ( $p = 0.0368$ ), whereas compartment differences were no longer detected following 1x, 2x, or 10x IBU administration (all $p > 0.05$ ). Comparisons across treatment conditions further revealed significantly reduced BGHR puncta density in 10x DLS striosomes relative to SAL striosomes ( $p = 0.0007$ ), while lower IBU doses did not significantly differ from SAL striosomes (all $p > 0.05$ ). In contrast, DLS matrix BGHR puncta density did not differ across treatment conditions (all $p > 0.99$ ). Together, these findings demonstrate that DLS striosomes exhibit greater baseline BGHR binding relative to surrounding matrix compartments and that high levels of prior GHSR activation reduce compartment-selective BGHR binding within the DLS. |
| <b>Fig S14D</b><br>Striosomal cFos expression across DMS and DLS compartments following IBU administration | <b>Main effects:</b> To determine whether different levels of GHSR activation preferentially recruit distinct striosomal subregions, cFos expression was quantified within DMS and DLS striosomal compartments following administration of SAL (rats = 7), 0.5x IBU (rats = 8), 1x IBU (rats = 6), 2x IBU (rats = 8), and 10x IBU (rats = 8). Group comparisons were analyzed using a two-way ANOVA followed by Tukey's multiple comparisons test. Analysis revealed a significant interaction between IBU dose and striatal region ( $F(4,62) = 18.04$ , $p = 0.00000000072$ ), a significant main effect of IBU dose ( $F(4,62) = 33.45$ , $p = 7 \times 10^{-15}$ ), and a significant main effect of striatal region ( $F(1,62) = 128.8$ , $p < 0.000000000000001$ ), indicating that GHSR activation differentially modulates striosomal activity across DMS and DLS compartments.                                                                                                           | <b>Post hoc comparisons:</b> Tukey's multiple comparisons test revealed that increases in striosomal cFos expression were selectively restricted to the DMS at intermediate IBU doses. Relative to SAL DMS striosomes, both 1x and 2x IBU significantly increased DMS striosomal cFos expression (SAL vs 1x DMS, $p = 0.000000011$ ; SAL vs 2x DMS, $p = 0.00000000021$ ), whereas no differences were observed at 0.5x or 10x doses (all $p > 0.99$ ). Similarly, DMS striosomal activity under 1x and 2x conditions was significantly greater than corresponding DLS striosomal compartments (1x DMS vs 1x DLS, $p =$                                                                                                                                                                                                                                                                                                                                                                                                                                                                                                                                |

|                                                                                                     |                                                                                                                                                                                                                                                                                                                                                                                                                                                                                                                                                                                                                                                                                                                                                                                                                                                                 |                                                                                                                                                                                                                                                                                                                                                                                                                                                                                                                                                                                                                                                                                                                                                                                                                                                                                                                                                                                                                                                                                                                                |
|-----------------------------------------------------------------------------------------------------|-----------------------------------------------------------------------------------------------------------------------------------------------------------------------------------------------------------------------------------------------------------------------------------------------------------------------------------------------------------------------------------------------------------------------------------------------------------------------------------------------------------------------------------------------------------------------------------------------------------------------------------------------------------------------------------------------------------------------------------------------------------------------------------------------------------------------------------------------------------------|--------------------------------------------------------------------------------------------------------------------------------------------------------------------------------------------------------------------------------------------------------------------------------------------------------------------------------------------------------------------------------------------------------------------------------------------------------------------------------------------------------------------------------------------------------------------------------------------------------------------------------------------------------------------------------------------------------------------------------------------------------------------------------------------------------------------------------------------------------------------------------------------------------------------------------------------------------------------------------------------------------------------------------------------------------------------------------------------------------------------------------|
|                                                                                                     |                                                                                                                                                                                                                                                                                                                                                                                                                                                                                                                                                                                                                                                                                                                                                                                                                                                                 | 0.000000000036; 2x DMS vs 2x DLS, $p = 0.000000000019$ ). In contrast, DLS striosomal cFos expression did not significantly differ from SAL conditions across any IBU dose (all $p > 0.88$ ). Together, these findings demonstrate that intermediate levels of GHSR activation selectively recruit DMS striosomal compartments while sparing DLS striosomes, indicating region-specific recruitment of striosomal circuitry following GHSR activation.                                                                                                                                                                                                                                                                                                                                                                                                                                                                                                                                                                                                                                                                         |
| Fig S14E<br>Striosomal pPDH expression across DMS and DLS compartments following IBU administration | <b>Main effects:</b> To determine whether different levels of GHSR activation differentially modulate activity states across DMS and DLS striosomal compartments, pPDH expression was quantified within DMS and DLS striosomes following administration of SAL (rats=7), 0.5x IBU (rats=6), 1x IBU (rats=6), 2x IBU (rats=6), and 10x IBU (rats=5). Group comparisons were analyzed using a two-way ANOVA followed by Tukey's multiple comparisons test. Analysis revealed a significant interaction between IBU dose and striatal region ( $F(4,49)=9.096$ , $p=0.000014$ ), a significant main effect of IBU dose ( $F(4,49)=4.947$ , $p=0.00198$ ), and a significant main effect of striatal region ( $F(1,49)=10.33$ , $p=0.00231$ ), indicating that GHSR activation differentially modulates pPDH expression across DMS and DLS striosomal compartments. | <b>Post hoc comparisons:</b> Tukey's multiple comparisons test revealed that increases in pPDH expression were selectively restricted to DLS striosomes at intermediate IBU doses. Relative to SAL DLS striosomes, both 1x and 2x IBU significantly increased DLS striosomal pPDH expression (SAL vs 1x DLS, $p=0.0079$ ; SAL vs 2x DLS, $p=0.0003$ ), whereas no differences were observed within DMS striosomes across treatment conditions (all $p > 0.17$ ). Within both the 1x and 2x IBU conditions, DLS striosomes displayed significantly greater pPDH expression relative to corresponding DMS striosomal compartments (1x DMS vs 1x DLS, $p=0.0267$ ; 2x DMS vs 2x DLS, $p < 0.0001$ ). In contrast, no DMS versus DLS differences were observed under SAL, 0.5x, or 10x conditions (all $p > 0.43$ ). Together, these findings demonstrate that intermediate levels of GHSR activation selectively increase pPDH expression within DLS striosomes while simultaneously increasing cFos recruitment within DMS striosomes, supporting a functional DMS–DLS striosomal seesaw following intermediate GHSR activation. |
| Fig S14F<br>Correlation between DMS striosomal cFos                                                 | <b>Linear regression analysis:</b> To determine whether increased activity within DMS striosomes was associated with reduced activity within DLS striosomes across different levels of GHSR activation, correlation analyses were performed comparing DMS striosomal cFos expression with DLS striosomal pPDH expression across all IBU treatment conditions. Linear regression analysis                                                                                                                                                                                                                                                                                                                                                                                                                                                                        | <b>Correlation analysis:</b> Pearson correlation analysis further demonstrated a significant positive correlation between DMS striosomal cFos expression and DLS striosomal pPDH expression ( $r = 0.6315$ , $p=0.0002$ ; 95% CI: 0.3447 to 0.8104; $n = 29$ ). Together, these findings indicate that                                                                                                                                                                                                                                                                                                                                                                                                                                                                                                                                                                                                                                                                                                                                                                                                                         |

|                                                                        |                                                                                                                                                                                                                                                                                                                                                                                                                                                                                                                                                                                                                                                                                                                                                                                                                                                                                                                                                                                                                                                                                                                                                                                                                                                                                                                                            |                                                                                                                                                                                                                                                                                                                                                                                                                                                                                                                                                                                                                                                                                                                                                                                                                                                                                                                                                                                                                                                                                                                                                                                                                                                                                                                                                                                                                                                                                                                      |
|------------------------------------------------------------------------|--------------------------------------------------------------------------------------------------------------------------------------------------------------------------------------------------------------------------------------------------------------------------------------------------------------------------------------------------------------------------------------------------------------------------------------------------------------------------------------------------------------------------------------------------------------------------------------------------------------------------------------------------------------------------------------------------------------------------------------------------------------------------------------------------------------------------------------------------------------------------------------------------------------------------------------------------------------------------------------------------------------------------------------------------------------------------------------------------------------------------------------------------------------------------------------------------------------------------------------------------------------------------------------------------------------------------------------------|----------------------------------------------------------------------------------------------------------------------------------------------------------------------------------------------------------------------------------------------------------------------------------------------------------------------------------------------------------------------------------------------------------------------------------------------------------------------------------------------------------------------------------------------------------------------------------------------------------------------------------------------------------------------------------------------------------------------------------------------------------------------------------------------------------------------------------------------------------------------------------------------------------------------------------------------------------------------------------------------------------------------------------------------------------------------------------------------------------------------------------------------------------------------------------------------------------------------------------------------------------------------------------------------------------------------------------------------------------------------------------------------------------------------------------------------------------------------------------------------------------------------|
| <p>expression and DLS striosomal pPDH expression across IBU doses</p>  | <p>revealed a significant positive relationship between DMS striosomal cFos expression and DLS striosomal pPDH expression (<math>F(1,27)=17.91</math>, <math>p=0.0002</math>), with an <math>R^2</math> value of 0.3988. The resulting regression equation was <math>Y=0.2032X + 14.09</math>, with a slope significantly different from zero (95% CI: 0.1047 to 0.3018).</p>                                                                                                                                                                                                                                                                                                                                                                                                                                                                                                                                                                                                                                                                                                                                                                                                                                                                                                                                                              | <p>increased recruitment of DMS striosomal activity is associated with increased pPDH expression within DLS striosomes, supporting a functional relationship between DMS striosomal activation and reduced DLS striosomal activity across different levels of GHSR activation.</p>                                                                                                                                                                                                                                                                                                                                                                                                                                                                                                                                                                                                                                                                                                                                                                                                                                                                                                                                                                                                                                                                                                                                                                                                                                   |
| <p>Fig S14G DMS–DLS activation/inactivity balance across IBU doses</p> | <p><b>Main effects:</b> To determine whether different levels of GHSR activation shift the functional balance between DMS and DLS striosomal activity states, a normalized activation–inactivity index was calculated for each animal by pairing cFos and pPDH values from the same striatal region and applying the formula: <math>(cFos-pPDH)/(cFos+pPDH)(cFos-pPDH)/(cFos+pPDH)</math>. Positive values indicate relative activation bias, whereas negative values indicate relative inactivity bias. Separate balance indices were calculated for DMS and DLS striosomes across SAL, 0.5x IBU, 1x IBU, 2x IBU, and 10x IBU conditions (rats = 5–7 per group). Data were analyzed using a two-way ANOVA followed by Tukey’s multiple comparisons test. Analysis revealed a significant interaction between IBU dose and striatal region (<math>F(4,49) = 3.786</math>, <math>p = 0.00924</math>), as well as a significant main effect of striatal region (<math>F(1,49) = 106.5</math>, <math>p &lt; 1 \times 10^{-11}</math>). In contrast, the main effect of IBU dose did not reach significance (<math>F(4,49) = 1.701</math>, <math>p = 0.165</math>). Together, these findings indicate that GHSR activation differentially shifts the balance between activation and inactivity across DMS and DLS striosomal compartments.</p> | <p><b>Post hoc comparisons:</b> Tukey’s multiple comparisons test revealed that intermediate IBU doses produced the strongest divergence between DMS and DLS activity states. Within the 1x IBU condition, DMS balance values were significantly greater than DLS values (<math>p = 0.00000065</math>), indicating increased DMS activation bias relative to DLS. Similarly, within the 2x IBU condition, DMS values remained significantly greater than DLS values (<math>p = 0.0000026</math>). Relative to saline DMS values, the 2x DMS condition also showed a significant shift toward activation bias (<math>p = 0.0142</math>), whereas DLS values remained comparatively negative across intermediate doses. Additional comparisons further demonstrated that both 1x and 2x DMS balance values differed significantly from multiple DLS conditions (all <math>p &lt; 0.003</math>), indicating strong separation between DMS and DLS functional states specifically at intermediate levels of GHSR activation. In contrast, the 10x IBU condition displayed reduced separation between DMS and DLS balance states relative to intermediate doses, consistent with partial loss of the DMS-selective activation state observed at high levels of GHSR activation. Together, these findings support a functional DMS–DLS striosomal seesaw in which intermediate GHSR activation shifts DMS striosomes toward an activated state while simultaneously biasing DLS striosomes toward relative inactivity.</p> |

|                                                                                                    |                                                                                                                                                                                                                                                                                                                                                                                                                                                                                                                                                                                                                                                                                                                                                                                                                                                                                                                                                                                                                                                                                                                                                                                                                                                                                                                                                                                                                                           |                                                                                                                                                                                                                                                                                                                                                                                                                                                                                                                                                                                                                                                                                                                                                                                                                                                                                                                                                                                                                                                                                                                                                       |
|----------------------------------------------------------------------------------------------------|-------------------------------------------------------------------------------------------------------------------------------------------------------------------------------------------------------------------------------------------------------------------------------------------------------------------------------------------------------------------------------------------------------------------------------------------------------------------------------------------------------------------------------------------------------------------------------------------------------------------------------------------------------------------------------------------------------------------------------------------------------------------------------------------------------------------------------------------------------------------------------------------------------------------------------------------------------------------------------------------------------------------------------------------------------------------------------------------------------------------------------------------------------------------------------------------------------------------------------------------------------------------------------------------------------------------------------------------------------------------------------------------------------------------------------------------|-------------------------------------------------------------------------------------------------------------------------------------------------------------------------------------------------------------------------------------------------------------------------------------------------------------------------------------------------------------------------------------------------------------------------------------------------------------------------------------------------------------------------------------------------------------------------------------------------------------------------------------------------------------------------------------------------------------------------------------------------------------------------------------------------------------------------------------------------------------------------------------------------------------------------------------------------------------------------------------------------------------------------------------------------------------------------------------------------------------------------------------------------------|
| <p>Fig S14H (left) cFos expression across IBU dose, striatal region, and striatal compartment</p>  | <p><b>Main effects:</b> To determine whether different levels of GHSR activation differentially recruit striatal subregions and compartments, cFos expression was quantified across IBU dose, striatal region, and striatal compartment. Groups included SAL (rats = 7), 0.5x IBU (rats = 7–8), 1x IBU (rats = 6), 2x IBU (rats = 7–8), and 10x IBU (rats = 8), with cFos quantified in DMS and DLS striosome and matrix compartments. Data were analyzed using a three-way ANOVA followed by Tukey's multiple comparisons test. Analysis revealed significant main effects of IBU dose (<math>F(4,124) = 38.66, p &lt; 1 \times 10^{-15}</math>), striatal region (<math>F(1,124) = 198.5, p &lt; 1 \times 10^{-15}</math>), and striatal compartment (<math>F(1,124) = 107.7, p &lt; 1 \times 10^{-15}</math>). Significant two-way interactions were also observed between IBU dose and striatal region (<math>F(4,124) = 19.13, p = 2.83 \times 10^{-12}</math>), IBU dose and compartment (<math>F(4,124) = 24.68, p = 5.0 \times 10^{-15}</math>), and striatal region and compartment (<math>F(1,124) = 61.34, p = 1.84 \times 10^{-12}</math>). Finally, analysis revealed a significant three-way interaction between IBU dose, striatal region, and compartment (<math>F(4,124) = 14.68, p = 7.59 \times 10^{-10}</math>), indicating that IBU-induced cFos recruitment depends on both striatal subregion and compartment.</p> | <p><b>Post hoc comparisons:</b> Tukey's multiple comparisons test revealed that intermediate IBU doses selectively increased cFos expression within DMS striosomes. Relative to SAL DMS striosomes, cFos expression was significantly increased following 1x IBU (<math>p = 1.80 \times 10^{-13}</math>) and 2x IBU (<math>p = 9.0 \times 10^{-15}</math>), but not following 0.5x or 10x IBU (all <math>p &gt; 0.99</math>). Within-dose comparisons further showed that DMS striosomes were significantly elevated relative to DMS matrix, DLS striosomes, and DLS matrix at both 1x and 2x IBU doses (all <math>p &lt; 1 \times 10^{-13}</math>). In contrast, DLS striosomes did not significantly differ from DLS matrix at any dose, and matrix compartments did not show significant dose-dependent increases relative to saline controls. Together, these findings demonstrate that intermediate levels of GHSR activation selectively recruit DMS striosomes while sparing DLS striosomes and surrounding matrix compartments, supporting compartment- and region-specific engagement of striosomal circuitry following GHSR activation.</p> |
| <p>Fig S14H (right) pPDH expression across IBU dose, striatal region, and striatal compartment</p> | <p><b>Main effects:</b> To determine whether GHSR activation produced region- and compartment-specific patterns of neuronal inactivity, pPDH expression was quantified across IBU dose, striatal region, and striatal compartment. Groups included SAL (rats = 6–7), 0.5x IBU (rats = 5–6), 1x IBU (rats = 6), 2x IBU (rats = 6), and 10x IBU (rats = 5–6), with pPDH quantified in DMS and DLS striosome and matrix compartments. Data were analyzed using a three-way ANOVA followed by Tukey's multiple comparisons test. Analysis revealed significant main effects of IBU dose (<math>F(4,99) = 5.551, p = 0.00045</math>), striatal region (<math>F(1,99) = 10.84, p = 0.00138</math>), and striatal compartment (<math>F(1,99) = 115.8, p &lt; 1 \times 10^{-15}</math>). Significant two-way interactions were also observed between IBU dose and striatal region (<math>F(4,99) = 8.651, p = 4.97 \times 10^{-6}</math>), IBU dose and compartment (<math>F(4,99) = 4.264, p = 0.00317</math>), and striatal region and compartment (<math>F(1,99) = 9.683, p = 0.00243</math>). Importantly, analysis revealed a significant three-way interaction between IBU dose, striatal region, and compartment (<math>F(4,99) = 9.639, p = 1.26 \times 10^{-6}</math>).</p>                                                                                                                                                              | <p><b>Post hoc comparisons:</b> Tukey's multiple comparisons test revealed that intermediate IBU doses selectively increased pPDH expression within DLS striosomes. Relative to saline DLS striosomes, pPDH expression was significantly elevated following 1x IBU (<math>p = 3.61 \times 10^{-5}</math>) and 2x IBU (<math>p = 4.41 \times 10^{-8}</math>), while 0.5x and 10x IBU did not significantly differ from saline conditions (all <math>p &gt; 0.97</math>). Within-dose comparisons further demonstrated that DLS striosomes exhibited significantly greater pPDH expression relative to DMS striosomes, DMS matrix, and DLS matrix at both 1x and 2x IBU doses (all <math>p &lt; 5 \times 10^{-4}</math>). In contrast, matrix compartments did not show significant dose-dependent increases relative to saline controls, and DMS striosomes remained largely unchanged across IBU doses. Together, these findings demonstrate that</p>                                                                                                                                                                                                 |

|  |                                                                                                         |                                                                                                                                                                                                                                                                                                      |
|--|---------------------------------------------------------------------------------------------------------|------------------------------------------------------------------------------------------------------------------------------------------------------------------------------------------------------------------------------------------------------------------------------------------------------|
|  | indicating that GHSR-mediated inactivity differed depending on both striatal subregion and compartment. | intermediate levels of GHSR activation selectively increase inactivity within DLS striosomes while not affecting surrounding matrix compartments, supporting a functional DMS/DLS striosomal balance in which activation of DMS striosomes is accompanied by reduced activity within DLS striosomes. |
|--|---------------------------------------------------------------------------------------------------------|------------------------------------------------------------------------------------------------------------------------------------------------------------------------------------------------------------------------------------------------------------------------------------------------------|

2977

2978

2979 **13.4 Table S4: Anatomical Region names and coordinates**

| Abbreviations | Full Name                             | Bregma Coordinate |
|---------------|---------------------------------------|-------------------|
| PL            | Prelimbic                             | +3.24             |
| IL            | Infralimbic                           |                   |
| OFC           | Orbitofrontal                         |                   |
| A24b (Cg1)    | Cingulate 1                           | +1.8              |
| A24a (Cg2)    | Cingulate 2                           |                   |
| A33 (Cg3)     | Cingulate 3                           |                   |
| DMS           | Dorsomedial striatum                  |                   |
| DLS           | Dorsolateral striatum                 |                   |
| vDMS          | Ventral dorsomedial striatum          |                   |
| vDLS          | Ventral dorsolateral striatum         |                   |
| AcbC          | Nucleus Accumbens                     |                   |
| M1            | Motor 1                               |                   |
| M2            | Motor 2                               |                   |
| INS           | Insular                               |                   |
| Cl            | Clastrum                              |                   |
| S1FL          | Sensory                               |                   |
| Pir           | Piriform                              |                   |
| En            | Endoform                              |                   |
| VDB           | Diagonal band of Broca, vertical limb |                   |
| LSD           | Lateral Septal, dorsal                | +1.4              |
| LSV           | Lateral Septal, ventral               |                   |
| Gpe           | Globus pallidus external              | -1.56             |
| Gpi           | Globus pallidus internal              |                   |

|                    |                                          |                      |
|--------------------|------------------------------------------|----------------------|
| STN                | Subthalamic nucleus                      | -3.60                |
| AD                 | Anterodorsal thalamic nucleus            | -1.56                |
| PT                 | Paratenial thalamic nucleus              |                      |
| MD                 | Mediodorsal thalamic nucleus             |                      |
| rPVT               | rostral Paraventricular thalamic nucleus |                      |
| cPVT               | caudal Paraventricular thalamic nucleus  | -3.24                |
| IMD                | Intermediodorsal thalamic nucleus        |                      |
| CM                 | Central medial thalamic nucleus          |                      |
| PC                 | Paracentral thalamic nucleus             |                      |
| CL                 | Central lateral thalamic nucleus         |                      |
| RH                 | Rhomboid                                 |                      |
| BLA                | Basolateral Amygdala                     | -3.0                 |
| CeA                | Central Amygdala                         |                      |
| MeA                | Medial Amygdala                          |                      |
| LHb                | Lateral Habenula                         | -3.70                |
| MHb                | Medial Habenula                          |                      |
| PVN                | Paraventricular hypothalamic nucleus     | -1.56                |
| DMD                | Dorsal medial hypothalamic nucleus       | -3.0                 |
| VMH                | Ventromedial hypothalamic nucleus        |                      |
| ARC                | Arcuate hypothalamic nucleus             |                      |
| SNr                | Substantia nigra pars reticulata         | -5.16                |
| daSNc              | Substantia nigra pars compacta           |                      |
| VTA                | Ventral Tegmental Area                   |                      |
| Surgical Targeting |                                          |                      |
| Experiment         | Brain region                             | Surgical Coordinates |

|                                                |     |                                                                                                                                                               |
|------------------------------------------------|-----|---------------------------------------------------------------------------------------------------------------------------------------------------------------|
| GCaMP <i>in vivo</i> calcium imaging           | DMS | Injection site:<br>AP +1.5 mm, ML $\pm$ 2.0 mm, DV -3.6 mm                                                                                                    |
| DREADD Virus injections                        |     | Implantation site:<br>AP +1.5 mm, ML $\pm$ 2.0 mm, DV -3.5mm<br><br>Excitatory (hM3Dq) or Inhibitory (hM4Di):<br><br>AP +1.28 mm, ML $\pm$ 1.8 mm, DV -3.7 mm |
| Rabies Assisted Monosynaptic tracing           |     |                                                                                                                                                               |
| Helper virus injection sites for TRIO strategy | LHb | AP -3.4 mm, ML $\pm$ 0.8 mm, DV -5.0 mm                                                                                                                       |
|                                                | Gpi | AP -2.2 mm, ML $\pm$ 2.8 mm, DV -7.8                                                                                                                          |
| RVΔG injections for TRIO strategy              | Gpi | AP -2.2 mm, ML $\pm$ 2.8 mm, DV -7.8                                                                                                                          |
| Helper virus injection for SNc tracing         | SNc | AP -5.4 mm, ML $\pm$ 2.2 mm, and DV -7.9 mm.                                                                                                                  |
| RVΔG injections for SNc tracing                | SNc | AP -5.4 mm, ML $\pm$ 2.2 mm, and DV -7.9 mm                                                                                                                   |
| Tissue Section Retrieval: Monosynaptic tracing |     | Bregma Coordinates                                                                                                                                            |
|                                                | DMS | +2.5 to +0.5 mm                                                                                                                                               |
|                                                | LHb | -3.4 mm                                                                                                                                                       |
|                                                | Gpi | -2.2 mm                                                                                                                                                       |

2980

2981

2982 **13.5 Table S5: Model Interpretations of selected experimental studies (Related to Note S1)**

| Paper                                 | Key Finding                                                | Model Interpretation                                                       |
|---------------------------------------|------------------------------------------------------------|----------------------------------------------------------------------------|
| Pietrzak et al. (2024) <sup>10</sup>  | Ghrelin ↓ punishment sensitivity; ↑ prediction error       | Reduced weighting of cost dimension; Prediction error reflects space shift |
| Ralevski et al. (2018) <sup>13</sup>  | Higher ghrelin → ↑ reward sensitivity & impulsivity        | Ghrelin-induced hyperactivity → ↑ impulsivity & reward focus               |
| Anderberg et al. (2016) <sup>14</sup> | Ghrelin ↑ impulsivity                                      | Reduced dimensionality (via Ghrelin) → ↑ impulsivity                       |
| Schéle et al. (2020) <sup>11</sup>    | Ghrelin alters social dominance based on baseline tendency | Amplifies focus on individually dominant dimension(s)                      |

2983

2984 **13.6 Table S6: Model prediction of disorders coinciding with ghrelin changes (Related to**  
2985 **Note S3)**

| Disorder  | Directional Effect | Model Prediction                               |
|-----------|--------------------|------------------------------------------------|
| Stress    | ↑                  | Narrowed focus on primary stressor/information |
| Addiction | ↑                  | Narrowed focus on substance/abuse-related cues |

2986  
2987

## 2988 13.7 Table S7: DOIs

| Experiment Description                                                                               | DOI                                                                                                                                                                                                                                                                                                                                                                                                                                                                                                                  | Notes                 |
|------------------------------------------------------------------------------------------------------|----------------------------------------------------------------------------------------------------------------------------------------------------------------------------------------------------------------------------------------------------------------------------------------------------------------------------------------------------------------------------------------------------------------------------------------------------------------------------------------------------------------------|-----------------------|
| <b>Fig. 1B-D.</b>                                                                                    | Food alone<br><a href="https://doi.org/10.7910/DVN/DCB1IH">https://doi.org/10.7910/DVN/DCB1IH</a><br>Toy alone<br><a href="https://doi.org/10.7910/DVN/YMYXO0">https://doi.org/10.7910/DVN/YMYXO0</a><br>Light alone<br><a href="https://doi.org/10.7910/DVN/JW2C3Q">https://doi.org/10.7910/DVN/JW2C3Q</a><br>Food+light<br><a href="https://doi.org/10.7910/DVN/0V6WKG">https://doi.org/10.7910/DVN/0V6WKG</a><br>Toy+light<br><a href="https://doi.org/10.7910/DVN/ZUH9YY">https://doi.org/10.7910/DVN/ZUH9YY</a> | Raw Data              |
| <b>Fig. 1E-G.</b>                                                                                    | <a href="https://doi.org/10.7910/DVN/GFLZYM">https://doi.org/10.7910/DVN/GFLZYM</a><br><a href="https://doi.org/10.7910/DVN/KJAMMP">https://doi.org/10.7910/DVN/KJAMMP</a>                                                                                                                                                                                                                                                                                                                                           | Raw Data and Analysis |
| <b>Fig. 1H.<br/>10x behavior</b>                                                                     | <a href="https://doi.org/10.7910/DVN/OE73LI">https://doi.org/10.7910/DVN/OE73LI</a>                                                                                                                                                                                                                                                                                                                                                                                                                                  | Raw Data and Analysis |
| <b>Fig.2A-C.</b><br>DMS cFos<br>expression<br>across IBU<br>concentrations                           | <a href="https://doi.org/10.7910/DVN/KRAGMO">https://doi.org/10.7910/DVN/KRAGMO</a>                                                                                                                                                                                                                                                                                                                                                                                                                                  | Raw Data              |
|                                                                                                      | <a href="https://doi.org/10.7910/DVN/NEVZXF">https://doi.org/10.7910/DVN/NEVZXF</a>                                                                                                                                                                                                                                                                                                                                                                                                                                  | ImageJ Analysis       |
| <b>Fig. 2D-F.</b><br>GHSR<br>expression in<br>Striatum<br>(striosomes,<br>matrix)                    | <a href="https://doi.org/10.7910/DVN/UHTDDW">https://doi.org/10.7910/DVN/UHTDDW</a>                                                                                                                                                                                                                                                                                                                                                                                                                                  | Raw Data              |
|                                                                                                      | <a href="https://doi.org/10.7910/DVN/SNSRF4">https://doi.org/10.7910/DVN/SNSRF4</a>                                                                                                                                                                                                                                                                                                                                                                                                                                  | ImageJ Analysis       |
| <b>Fig. 2G-H.</b><br>BGHR<br>expression in<br>striatum<br>(striosomes,<br>matrix)                    | <a href="https://doi.org/10.7910/DVN/KRAGMO">https://doi.org/10.7910/DVN/KRAGMO</a>                                                                                                                                                                                                                                                                                                                                                                                                                                  | Raw Data              |
|                                                                                                      | <a href="https://doi.org/10.7910/DVN/SNSRF4">https://doi.org/10.7910/DVN/SNSRF4</a>                                                                                                                                                                                                                                                                                                                                                                                                                                  | ImageJ Analysis       |
| <b>Fig. 2J-K.</b><br>LHb cFos<br>expression<br>across IBU<br>concentrations                          | <a href="https://doi.org/10.7910/DVN/D5BCOY">https://doi.org/10.7910/DVN/D5BCOY</a>                                                                                                                                                                                                                                                                                                                                                                                                                                  | Raw Data              |
|                                                                                                      | <a href="https://doi.org/10.7910/DVN/JWSLB">https://doi.org/10.7910/DVN/JWSLB</a>                                                                                                                                                                                                                                                                                                                                                                                                                                    | ImageJ Analysis       |
| <b>Fig. 2L-M.</b><br>daSNC<br>expression of<br>pPDH, TH,<br>and cFOS<br>across IBU<br>concentrations | <a href="https://doi.org/10.7910/DVN/AVMV9E">https://doi.org/10.7910/DVN/AVMV9E</a>                                                                                                                                                                                                                                                                                                                                                                                                                                  | Raw Data              |
|                                                                                                      | <a href="https://doi.org/10.7910/DVN/JWSLB">https://doi.org/10.7910/DVN/JWSLB</a>                                                                                                                                                                                                                                                                                                                                                                                                                                    | ImageJ Analysis       |
| <b>Fig. 3A-B.</b>                                                                                    | <a href="https://doi.org/10.7910/DVN/C9VBK7">https://doi.org/10.7910/DVN/C9VBK7</a>                                                                                                                                                                                                                                                                                                                                                                                                                                  | Raw Data              |
|                                                                                                      | <a href="https://doi.org/10.7910/DVN/QLVA4X">https://doi.org/10.7910/DVN/QLVA4X</a>                                                                                                                                                                                                                                                                                                                                                                                                                                  | ImageJ Analysis       |

|                                                                                       |                                                                                                                                                                                           |                       |
|---------------------------------------------------------------------------------------|-------------------------------------------------------------------------------------------------------------------------------------------------------------------------------------------|-----------------------|
| hM4Di+ virus expression in striosomes and matrix                                      |                                                                                                                                                                                           |                       |
| <b>Fig. 3C-E.</b><br>In-vivo calcium dynamics following 2x and 10X IBU                | <a href="https://doi.org/10.7910/DVN/US8QTS">https://doi.org/10.7910/DVN/US8QTS</a>                                                                                                       | Raw Data              |
| <b>Fig. 4C.</b><br>IHC of Oprm1-cre striosomal manipulation with DREADD               | <a href="https://doi.org/10.7910/DVN/C9VBK7">https://doi.org/10.7910/DVN/C9VBK7</a>                                                                                                       | Raw Data              |
|                                                                                       | <a href="https://doi.org/10.7910/DVN/QLVA4X">https://doi.org/10.7910/DVN/QLVA4X</a>                                                                                                       | ImageJ Analysis       |
| <b>Fig. 4D-E</b><br>Non-conflict and conflict Oprm1 2x                                | <a href="https://doi.org/10.7910/DVN/TNT3FV">https://doi.org/10.7910/DVN/TNT3FV</a><br><a href="https://doi.org/10.7910/DVN/KJAMMP">https://doi.org/10.7910/DVN/KJAMMP</a>                | Raw Data and Analysis |
| <b>Fig. 4F.</b><br>cFos expression in LHb after striosomal manipulation with DREADD   | <a href="https://doi.org/10.7910/DVN/CT9ATL">https://doi.org/10.7910/DVN/CT9ATL</a>                                                                                                       | Raw Data              |
|                                                                                       | <a href="https://doi.org/10.7910/DVN/QLVA4X">https://doi.org/10.7910/DVN/QLVA4X</a>                                                                                                       | ImageJ Analysis       |
| <b>Fig. 4G.</b><br>cFos expression in daSNC after striosomal manipulation with DREADD | <a href="https://doi.org/10.7910/DVN/N7FGMH">https://doi.org/10.7910/DVN/N7FGMH</a>                                                                                                       | Raw Data              |
|                                                                                       | <a href="https://doi.org/10.7910/DVN/QLVA4X">https://doi.org/10.7910/DVN/QLVA4X</a>                                                                                                       | ImageJ Analysis       |
| <b>Fig. 5 Modeling</b>                                                                | <a href="https://github.com/dirkbeck/ghrelin_project">https://github.com/dirkbeck/ghrelin_project</a>                                                                                     | Raw Data              |
| <b>Fig. S1A</b><br>Baseline of simple tasks Oprm1 WT                                  | <a href="https://doi.org/10.7910/DVN/OE73LI">https://doi.org/10.7910/DVN/OE73LI</a>                                                                                                       | Raw Data              |
| <b>Fig. S1 B</b><br>Food alone 2x                                                     | <a href="https://doi.org/10.7910/DVN/DCB1IH">https://doi.org/10.7910/DVN/DCB1IH</a> , left<br><a href="https://doi.org/10.7910/DVN/NTB2PG">https://doi.org/10.7910/DVN/NTB2PG</a> , right | Raw Data              |
| <b>Fig. S1 C</b><br>Toy alone 2x                                                      | <a href="https://doi.org/10.7910/DVN/YMYXO0">https://doi.org/10.7910/DVN/YMYXO0</a> , left<br><a href="https://doi.org/10.7910/DVN/NTB2PG">https://doi.org/10.7910/DVN/NTB2PG</a> , right | Raw Data              |
| <b>Fig. S1 D</b><br>Light alone 2x                                                    | <a href="https://doi.org/10.7910/DVN/JW2C3Q">https://doi.org/10.7910/DVN/JW2C3Q</a> , left<br><a href="https://doi.org/10.7910/DVN/NTB2PG">https://doi.org/10.7910/DVN/NTB2PG</a> , right | Raw Data              |
| <b>Fig. S1 E</b><br>Food+light 2x                                                     | <a href="https://doi.org/10.7910/DVN/0V6WKG">https://doi.org/10.7910/DVN/0V6WKG</a> , left<br><a href="https://doi.org/10.7910/DVN/NTB2PG">https://doi.org/10.7910/DVN/NTB2PG</a> , right | Raw Data              |

|                                                                                         |                                                                                                                                                                                                                                                                                                                                                                                                                                                                                                                                                                                                                         |                                              |
|-----------------------------------------------------------------------------------------|-------------------------------------------------------------------------------------------------------------------------------------------------------------------------------------------------------------------------------------------------------------------------------------------------------------------------------------------------------------------------------------------------------------------------------------------------------------------------------------------------------------------------------------------------------------------------------------------------------------------------|----------------------------------------------|
| <b>Fig. S1 F</b><br>Toy+light 2x                                                        | <a href="https://doi.org/10.7910/DVN/ZUH9YY">https://doi.org/10.7910/DVN/ZUH9YY</a> , left<br><a href="https://doi.org/10.7910/DVN/NTB2PG">https://doi.org/10.7910/DVN/NTB2PG</a> , right                                                                                                                                                                                                                                                                                                                                                                                                                               | Raw Data                                     |
| <b>Fig.S1 G</b><br>Long Evans<br>and Oprm1-<br>WT<br>performance<br>across all<br>tasks | Food alone<br><a href="https://doi.org/10.7910/DVN/DCB1IH">https://doi.org/10.7910/DVN/DCB1IH</a><br>Toy alone<br><a href="https://doi.org/10.7910/DVN/YMYXO0">https://doi.org/10.7910/DVN/YMYXO0</a><br>Light alone<br><a href="https://doi.org/10.7910/DVN/JW2C3Q">https://doi.org/10.7910/DVN/JW2C3Q</a><br>Food+light<br><a href="https://doi.org/10.7910/DVN/0V6WKG">https://doi.org/10.7910/DVN/0V6WKG</a><br>Toy+light<br><a href="https://doi.org/10.7910/DVN/ZUH9YY">https://doi.org/10.7910/DVN/ZUH9YY</a><br>Analysis<br><a href="https://doi.org/10.7910/DVN/KJAMMP">https://doi.org/10.7910/DVN/KJAMMP</a> | Raw data and Analysis                        |
| <b>Fig. S2A, E</b>                                                                      | <a href="https://doi.org/10.7910/DVN/TNT3FV">https://doi.org/10.7910/DVN/TNT3FV</a>                                                                                                                                                                                                                                                                                                                                                                                                                                                                                                                                     | Excel tables with the x/y<br>coordinate data |
|                                                                                         | <a href="https://doi.org/10.7910/DVN/TNT3FV">https://doi.org/10.7910/DVN/TNT3FV</a> ,<br><a href="https://github.com/atanugiri/GhrelinBehaviorQuantification.git">https://github.com/atanugiri/GhrelinBehaviorQuantification.git</a>                                                                                                                                                                                                                                                                                                                                                                                    | Code generated                               |
| <b>Fig. S2 B-D,<br/>F-G</b>                                                             | <a href="https://doi.org/10.7910/DVN/OE73LI">https://doi.org/10.7910/DVN/OE73LI</a><br><a href="https://doi.org/10.7910/DVN/KJAMMP">https://doi.org/10.7910/DVN/KJAMMP</a>                                                                                                                                                                                                                                                                                                                                                                                                                                              | Raw Data and Analysis                        |
| <b>Fig. S2 H-J</b>                                                                      | <a href="https://doi.org/10.7910/DVN/GFLZYM">https://doi.org/10.7910/DVN/GFLZYM</a><br><a href="https://doi.org/10.7910/DVN/KJAMMP">https://doi.org/10.7910/DVN/KJAMMP</a>                                                                                                                                                                                                                                                                                                                                                                                                                                              | Raw Data and Analysis                        |
| <b>Fig. S3 A-D.</b><br>cFOS IHC in<br>50 brain<br>regions after<br>1x IBU               | <a href="https://doi.org/10.7910/DVN/DTXBD5">https://doi.org/10.7910/DVN/DTXBD5</a><br><a href="https://doi.org/10.7910/DVN/EI60AH">https://doi.org/10.7910/DVN/EI60AH</a><br><a href="https://doi.org/10.7910/DVN/PYW4WW">https://doi.org/10.7910/DVN/PYW4WW</a>                                                                                                                                                                                                                                                                                                                                                       | Raw Data/ analysis                           |
| <b>Fig. S3E-Q.</b><br>IHC analysis<br>in striatum for<br>cFos and<br>MOR after<br>1xIBU | <a href="https://doi.org/10.7910/DVN/EI60AH">https://doi.org/10.7910/DVN/EI60AH</a>                                                                                                                                                                                                                                                                                                                                                                                                                                                                                                                                     | ImageJ analysis                              |
| <b>Fig. S3R</b><br>IHC across 50<br>brain regions<br>following IBU                      | <a href="https://doi.org/10.7910/DVN/DTXBD5">https://doi.org/10.7910/DVN/DTXBD5</a><br><a href="https://doi.org/10.7910/DVN/EI60AH">https://doi.org/10.7910/DVN/EI60AH</a><br><a href="https://doi.org/10.7910/DVN/PYW4WW">https://doi.org/10.7910/DVN/PYW4WW</a>                                                                                                                                                                                                                                                                                                                                                       | Raw data                                     |
| <b>Fig. S3S-T.</b><br>DMS striatum<br>for cFos<br>analysis after<br>0.5x and<br>10xIBU  | <a href="https://doi.org/10.7910/DVN/KRAGMO">https://doi.org/10.7910/DVN/KRAGMO</a>                                                                                                                                                                                                                                                                                                                                                                                                                                                                                                                                     | Raw Data                                     |
| <b>Fig. S3U-V.</b><br>IHC of DMS<br>striatum for<br>GHSR<br>expression                  | <a href="https://doi.org/10.7910/DVN/UHTDDW">https://doi.org/10.7910/DVN/UHTDDW</a>                                                                                                                                                                                                                                                                                                                                                                                                                                                                                                                                     | Raw data                                     |

|                                                                                                            |                                                                                     |                 |
|------------------------------------------------------------------------------------------------------------|-------------------------------------------------------------------------------------|-----------------|
| <b>Fig. S3W.</b><br>IHC of BGHR<br>in striatum                                                             | <a href="https://doi.org/10.7910/DVN/KRAGMO">https://doi.org/10.7910/DVN/KRAGMO</a> | Raw data        |
| <b>Fig. S4A.</b><br>IHC of LHb for<br>cFos after IBU                                                       | <a href="https://doi.org/10.7910/DVN/D5BCOY">https://doi.org/10.7910/DVN/D5BCOY</a> | Raw data        |
| <b>Fig. S4B-C.</b><br>IHC of daSNC<br>for pPDH, TH,<br>and cFos<br>analysis after<br>IBU                   | <a href="https://doi.org/10.7910/DVN/AVMV9E">https://doi.org/10.7910/DVN/AVMV9E</a> | Raw data        |
|                                                                                                            | <a href="https://doi.org/10.7910/DVN/JWSLB">https://doi.org/10.7910/DVN/JWSLB</a>   | ImageJ analysis |
| <b>Fig. S4D.</b> Correlations- (DMS striosomes cFos and LHb cFos) and (DMS striosomes cFos and daSNC pPDH) |                                                                                     |                 |
| DMS<br>striosomes<br>cFos IHC                                                                              | <a href="https://doi.org/10.7910/DVN/KRAGMO">https://doi.org/10.7910/DVN/KRAGMO</a> | Raw data        |
|                                                                                                            | <a href="https://doi.org/10.7910/DVN/NEVZXF">https://doi.org/10.7910/DVN/NEVZXF</a> | ImageJ analysis |
| LHb cFos IHC                                                                                               | <a href="https://doi.org/10.7910/DVN/D5BCOY">https://doi.org/10.7910/DVN/D5BCOY</a> | Raw data        |
|                                                                                                            | <a href="https://doi.org/10.7910/DVN/JWSLB">https://doi.org/10.7910/DVN/JWSLB</a>   | ImageJ analysis |
| daSNC pPDH<br>IHC                                                                                          | <a href="https://doi.org/10.7910/DVN/AVMV9E">https://doi.org/10.7910/DVN/AVMV9E</a> | Raw data        |
|                                                                                                            | <a href="https://doi.org/10.7910/DVN/JWSLB">https://doi.org/10.7910/DVN/JWSLB</a>   | ImageJ analysis |
| <b>Fig. S4E.</b> Correlation between LHb fos and daSNC pPDH                                                |                                                                                     |                 |
| LHb cFos IHC                                                                                               | <a href="https://doi.org/10.7910/DVN/D5BCOY">https://doi.org/10.7910/DVN/D5BCOY</a> | Raw data        |
|                                                                                                            | <a href="https://doi.org/10.7910/DVN/JWSLB">https://doi.org/10.7910/DVN/JWSLB</a>   | ImageJ analysis |
| daSNC pPDH<br>IHC                                                                                          | <a href="https://doi.org/10.7910/DVN/AVMV9E">https://doi.org/10.7910/DVN/AVMV9E</a> | Raw data        |
|                                                                                                            | <a href="https://doi.org/10.7910/DVN/JWSLB">https://doi.org/10.7910/DVN/JWSLB</a>   | ImageJ analysis |
| <b>Fig. S4F.</b> Correlation between DMS striosomes cFos and daSNC cFos                                    |                                                                                     |                 |
| DMS<br>striosomes<br>cFos IHC                                                                              | <a href="https://doi.org/10.7910/DVN/KRAGMO">https://doi.org/10.7910/DVN/KRAGMO</a> | Raw data        |
|                                                                                                            | <a href="https://doi.org/10.7910/DVN/NEVZXF">https://doi.org/10.7910/DVN/NEVZXF</a> | ImageJ analysis |
| daSNC cFos<br>IHC                                                                                          | <a href="https://doi.org/10.7910/DVN/AVMV9E">https://doi.org/10.7910/DVN/AVMV9E</a> | Raw data        |
|                                                                                                            | <a href="https://doi.org/10.7910/DVN/JWSLB">https://doi.org/10.7910/DVN/JWSLB</a>   | ImageJ analysis |
| <b>Fig. S4G.</b><br>IHC of Arcuate<br>nucleus for<br>cFos analysis<br>after IBU                            | <a href="https://doi.org/10.7910/DVN/WANMCY">https://doi.org/10.7910/DVN/WANMCY</a> | Raw data        |
|                                                                                                            | <a href="https://doi.org/10.7910/DVN/JWSLB">https://doi.org/10.7910/DVN/JWSLB</a>   | ImageJ analysis |
| <b>Fig. S4H.</b><br>Correlation between DMS striosomes cFos and ARC cFos                                   |                                                                                     |                 |

|                                                                                            |                                                                                     |                       |
|--------------------------------------------------------------------------------------------|-------------------------------------------------------------------------------------|-----------------------|
|                                                                                            |                                                                                     |                       |
| DMS striosomes cFos IHC                                                                    | <a href="https://doi.org/10.7910/DVN/KRAGMO">https://doi.org/10.7910/DVN/KRAGMO</a> | Raw data              |
|                                                                                            | <a href="https://doi.org/10.7910/DVN/NEVZXF">https://doi.org/10.7910/DVN/NEVZXF</a> | ImageJ analysis       |
| ARC cFos IHC                                                                               | <a href="https://doi.org/10.7910/DVN/WANMCY">https://doi.org/10.7910/DVN/WANMCY</a> | Raw data              |
|                                                                                            | <a href="https://doi.org/10.7910/DVN/JWSLB">https://doi.org/10.7910/DVN/JWSLB</a>   | ImageJ analysis       |
| <b>Fig. S5A.</b><br>In-vivo calcium imaging and feeding behavior following IBU and aGHR.   | <a href="https://doi.org/10.7910/DVN/US8QTS">https://doi.org/10.7910/DVN/US8QTS</a> | Raw data and analysis |
| <b>Fig. S5B.</b><br>IPS cell map following 2xIBU injection                                 | <a href="https://doi.org/10.7910/DVN/US8QTS">https://doi.org/10.7910/DVN/US8QTS</a> | Analysis              |
| <b>Fig. S5C.</b><br>In-vivo calcium imaging following high doses of IBU acyl-ghrelin       | <a href="https://doi.org/10.7910/DVN/US8QTS">https://doi.org/10.7910/DVN/US8QTS</a> | Raw data              |
| <b>Fig. S5D.</b><br>2x IBU calcium dynamics time curve                                     | <a href="https://doi.org/10.7910/DVN/US8QTS">https://doi.org/10.7910/DVN/US8QTS</a> | Analysis              |
| <b>Fig. S5E, left</b><br><i>In-vivo calcium imaging time curve following 2x and 10xIBU</i> | <a href="https://doi.org/10.7910/DVN/US8QTS">https://doi.org/10.7910/DVN/US8QTS</a> | Analysis              |
| <b>Fig. S5E, right</b><br><i>In-vivo calcium</i>                                           | <a href="https://doi.org/10.7910/DVN/US8QTS">https://doi.org/10.7910/DVN/US8QTS</a> | Analysis              |

|                                                                                                |                                                                                                                                                                                                                                                                                                                                                                                                                                                                                                                                           |                       |
|------------------------------------------------------------------------------------------------|-------------------------------------------------------------------------------------------------------------------------------------------------------------------------------------------------------------------------------------------------------------------------------------------------------------------------------------------------------------------------------------------------------------------------------------------------------------------------------------------------------------------------------------------|-----------------------|
| <i>imaging time curve following 4.3 and 86ug/kg acyl-ghrelin:</i>                              |                                                                                                                                                                                                                                                                                                                                                                                                                                                                                                                                           |                       |
| <b>Fig. S5F.</b><br>Food consumption following acyl-ghrelin                                    | <a href="https://doi.org/10.7910/DVN/US8QTS">https://doi.org/10.7910/DVN/US8QTS</a>                                                                                                                                                                                                                                                                                                                                                                                                                                                       | Raw data and analysis |
| <b>Fig. S5G.</b><br>Food consumption following IBU and acyl-ghrelin in moderate and high doses | <a href="https://doi.org/10.7910/DVN/US8QTS">https://doi.org/10.7910/DVN/US8QTS</a>                                                                                                                                                                                                                                                                                                                                                                                                                                                       | Analysis              |
| <b>Fig. S6 A-D.</b><br>IHC of striosomes with DREADD manipulation in cre-OPRM1                 | <a href="https://doi.org/10.7910/DVN/C9VBK7">https://doi.org/10.7910/DVN/C9VBK7</a>                                                                                                                                                                                                                                                                                                                                                                                                                                                       | Raw data              |
| <b>Fig. S6 E-I.</b><br>pPDH IHC of striosomes with DREADD manipulation in cre-OPRM1            | <a href="https://doi.org/10.7910/DVN/QLVA4X">https://doi.org/10.7910/DVN/QLVA4X</a>                                                                                                                                                                                                                                                                                                                                                                                                                                                       | Analysis              |
| <b>Fig. S7B.</b><br>Non-conflict tasks                                                         | <p><i>Food alone task 2X IBU CRE-OPRM1:</i><br/><a href="https://doi.org/10.7910/DVN/NTB2PG">https://doi.org/10.7910/DVN/NTB2PG</a></p> <p><i>Toy alone task 2X IBU CRE-OPRM1:</i><br/><a href="https://doi.org/10.7910/DVN/NTB2PG">https://doi.org/10.7910/DVN/NTB2PG</a></p> <p><i>Light alone task 2X IBU CRE-OPRM1:</i><br/><a href="https://doi.org/10.7910/DVN/NTB2PG">https://doi.org/10.7910/DVN/NTB2PG</a></p> <p>Raw Data Analysis:<br/><a href="https://doi.org/10.7910/DVN/KJAMMP">https://doi.org/10.7910/DVN/KJAMMP</a></p> | Raw data and analysis |
| <b>Fig. S7C.</b><br>Conflict tasks                                                             | <p><i>Food+light task 2X IBU CRE-OPRM1:</i><br/><a href="https://doi.org/10.7910/DVN/NTB2PG">https://doi.org/10.7910/DVN/NTB2PG</a></p> <p><i>Toy+light task 2X IBU CRE-OPRM1:</i><br/><a href="https://doi.org/10.7910/DVN/NTB2PG">https://doi.org/10.7910/DVN/NTB2PG</a></p>                                                                                                                                                                                                                                                            | Raw data and analysis |

|                                                                                        |                                                                                                                                             |                       |
|----------------------------------------------------------------------------------------|---------------------------------------------------------------------------------------------------------------------------------------------|-----------------------|
|                                                                                        | Raw Data Analysis:<br><a href="https://doi.org/10.7910/DVN/KJAMMP">https://doi.org/10.7910/DVN/KJAMMP</a>                                   |                       |
| <b>Fig. S8B.</b><br>IHC of Lateral habenula with DREADD manipulation in cre-OPRM1      | <a href="https://doi.org/10.7910/DVN/CT9ATL">https://doi.org/10.7910/DVN/CT9ATL</a>                                                         | Raw data              |
| <b>Fig. S8C.</b><br>IHC of daSNC with DREADD manipulation in cre-OPRM1:                | <a href="https://doi.org/10.7910/DVN/N7FGMH">https://doi.org/10.7910/DVN/N7FGMH</a>                                                         | Raw data              |
| <b>Fig. S8D-G.</b><br>ANOVA post-hoc values following DREADD manipulation in cre-OPRM1 | <a href="https://doi.org/10.7910/DVN/QLVA4X">https://doi.org/10.7910/DVN/QLVA4X</a>                                                         | ImageJ analysis       |
| <b>Fig. S9.</b><br>Monosynaptic tracing of striosomes                                  | <a href="https://doi.org/10.7910/DVN/ZRLRXV">https://doi.org/10.7910/DVN/ZRLRXV</a>                                                         | Raw Data and analysis |
| <b>Fig. S10</b>                                                                        | <a href="https://github.com/dirkbeck/ghrelin_project">https://github.com/dirkbeck/ghrelin_project</a>                                       |                       |
| <b>Fig.S11</b><br>Motor analysis data and scripts                                      | <a href="https://doi.org/10.5281/zenodo.17280633">https://doi.org/10.5281/zenodo.17280633</a>                                               | Functions             |
|                                                                                        | <a href="https://github.com/atanugiri/GhrelinBehaviorQuantification.git">https://github.com/atanugiri/GhrelinBehaviorQuantification.git</a> | Living functions      |
|                                                                                        | <a href="https://doi.org/10.7910/DVN/G8CBKJ">https://doi.org/10.7910/DVN/G8CBKJ</a>                                                         | data                  |
| <b>Fig. S12</b><br>Motor analysis                                                      | <a href="https://github.com/dirkbeck/ghrelin_project">https://github.com/dirkbeck/ghrelin_project</a>                                       | Raw data and analysis |
| <b>Fig.S13</b><br>Motor analysis data and scripts                                      | <a href="https://doi.org/10.5281/zenodo.17280633">https://doi.org/10.5281/zenodo.17280633</a>                                               | Functions             |
|                                                                                        | <a href="https://github.com/atanugiri/GhrelinBehaviorQuantification.git">https://github.com/atanugiri/GhrelinBehaviorQuantification.git</a> | Living functions      |
|                                                                                        | <a href="https://doi.org/10.7910/DVN/G8CBKJ">https://doi.org/10.7910/DVN/G8CBKJ</a>                                                         | data                  |
| <b>Fig. S14 A.</b><br>IHC of BGHR in DLS striosome                                     | <a href="https://doi.org/10.7910/DVN/KRAGMO">https://doi.org/10.7910/DVN/KRAGMO</a>                                                         | Raw data              |
|                                                                                        | <a href="https://doi.org/10.7910/DVN/SNSRF4">https://doi.org/10.7910/DVN/SNSRF4</a>                                                         | Analysis              |
| <b>Fig. S14C.</b><br>IHC of DMS                                                        | <a href="https://doi.org/10.7910/DVN/KRAGMO">https://doi.org/10.7910/DVN/KRAGMO</a>                                                         | Raw Data              |

|                                                                                       |                                                                                                       |          |
|---------------------------------------------------------------------------------------|-------------------------------------------------------------------------------------------------------|----------|
| and DLS striatum for cFos, MOR, and pPDH analysis after IBU                           |                                                                                                       |          |
| <b>Fig. S14D.</b><br><i>IHC of DMS and DLS striosomes for cFos analysis after IBU</i> | <a href="https://doi.org/10.7910/DVN/KRAGMO">https://doi.org/10.7910/DVN/KRAGMO</a>                   | Raw Data |
|                                                                                       | <a href="https://doi.org/10.7910/DVN/NEVZXF">https://doi.org/10.7910/DVN/NEVZXF</a>                   | Analysis |
| <b>Fig. S14E.</b><br><i>IHC of DMS and DLS striosomes for pPDH analysis after IBU</i> | <a href="https://doi.org/10.7910/DVN/KRAGMO">https://doi.org/10.7910/DVN/KRAGMO</a>                   | Raw Data |
|                                                                                       | <a href="https://doi.org/10.7910/DVN/NEVZXF">https://doi.org/10.7910/DVN/NEVZXF</a>                   | Analysis |
| <b>Fig. S14F.</b><br>Correlation between striosomes DMS cFos and DLS pPDH             |                                                                                                       |          |
| DMS striosomes cFos IHC                                                               | <a href="https://doi.org/10.7910/DVN/KRAGMO">https://doi.org/10.7910/DVN/KRAGMO</a>                   | Raw data |
|                                                                                       | <a href="https://doi.org/10.7910/DVN/NEVZXF">https://doi.org/10.7910/DVN/NEVZXF</a>                   | Analysis |
| DLS striosomes pPDH IHC:                                                              | <a href="https://doi.org/10.7910/DVN/KRAGMO">https://doi.org/10.7910/DVN/KRAGMO</a>                   | Raw data |
|                                                                                       | <a href="https://doi.org/10.7910/DVN/NEVZXF">https://doi.org/10.7910/DVN/NEVZXF</a>                   | Analysis |
| <b>Fig. S14G.</b><br><i>Excitation-inhibition balance in DMS and DLS</i>              | <a href="https://doi.org/10.7910/DVN/NEVZXF">https://doi.org/10.7910/DVN/NEVZXF</a>                   | Analysis |
| <b>Fig. S14H Left</b><br><i>Striosomal cFos expression in DMS and DLS</i>             | <a href="https://doi.org/10.7910/DVN/NEVZXF">https://doi.org/10.7910/DVN/NEVZXF</a>                   | Analysis |
| <b>Fig. S14H Right</b><br><i>Striosomal pPDH expression in DMS and DLS</i>            | <a href="https://doi.org/10.7910/DVN/NEVZXF">https://doi.org/10.7910/DVN/NEVZXF</a>                   | Analysis |
| <b>Fig. S15 I-J Modeling</b>                                                          | <a href="https://github.com/dirkbeck/ghrelin_project">https://github.com/dirkbeck/ghrelin_project</a> |          |

| <b>Summary table of behavioral data depositions and processing pipelines</b>                                 |                                                                                                                                                                                                                                          |
|--------------------------------------------------------------------------------------------------------------|------------------------------------------------------------------------------------------------------------------------------------------------------------------------------------------------------------------------------------------|
| Raw behavioral videos recorded from rodent decision-making tasks                                             | <a href="https://doi.org/10.7910/DVN/SBH3UG">https://doi.org/10.7910/DVN/SBH3UG</a>                                                                                                                                                      |
| Behavioral videos obtained by splitting each raw recording into four quadrant-specific videos                | <a href="https://doi.org/10.7910/DVN/F0P2BC">https://doi.org/10.7910/DVN/F0P2BC</a>                                                                                                                                                      |
| DeepLabCut generated raw pose-estimation data                                                                | <a href="https://doi.org/10.7910/DVN/CUWGHY">https://doi.org/10.7910/DVN/CUWGHY</a>                                                                                                                                                      |
| DeepLabCut generated filtered pose-estimation data (input data for motor analysis) (Fig. S12, Fig. S14)      | <a href="https://doi.org/10.7910/DVN/G8CBKJ">https://doi.org/10.7910/DVN/G8CBKJ</a>                                                                                                                                                      |
| Setting up trial metadata table: dlc_table.csv                                                               | <a href="https://github.com/atanugiri/DLCDatabaseSetup/tree/main">https://github.com/atanugiri/DLCDatabaseSetup/tree/main</a>                                                                                                            |
| Data analysis pipeline for processing DeepLabCut pose-estimation data and performing motor-behavior analysis | <a href="https://github.com/atanugiri/GhrElinBehaviorQuantification">https://github.com/atanugiri/GhrElinBehaviorQuantification</a><br><br><a href="https://doi.org/10.5281/zenodo.17280633">https://doi.org/10.5281/zenodo.17280633</a> |
| Split videos function                                                                                        | <a href="https://github.com/atanugiri/DLCDatabaseSetup/tree/main/scripts">https://github.com/atanugiri/DLCDatabaseSetup/tree/main/scripts</a>                                                                                            |
| Data deposition for processed behavioral features derived from DeepLabCut pose-estimation outputs            | <a href="https://doi.org/10.7910/DVN/YN GH9C">https://doi.org/10.7910/DVN/YN GH9C</a>                                                                                                                                                    |
| Data analysis pipeline for processing behavioral task battery data                                           | <a href="https://github.com/atanugiri/Behavioral-task-battery-data-analysis">https://github.com/atanugiri/Behavioral-task-battery-data-analysis</a>                                                                                      |
| Processed behavioral datasets prepared for ANOVA statistical analysis                                        | <a href="https://doi.org/10.7910/DVN/YN GH9C">https://doi.org/10.7910/DVN/YN GH9C</a>                                                                                                                                                    |
| RECORD (Ibáñez Alcalá et al., 2024) repository                                                               | <a href="https://GitHub.com/rjibanezalcala/RECORD">https://GitHub.com/rjibanezalcala/RECORD</a>                                                                                                                                          |
| Movement analysis                                                                                            | <a href="https://github.com/dirkbeck/ghrelin_project">https://github.com/dirkbeck/ghrelin_project</a>                                                                                                                                    |
| Decision-space modeling                                                                                      | <a href="https://github.com/dirkbeck/ghrelin_project">https://github.com/dirkbeck/ghrelin_project</a>                                                                                                                                    |

2989  
2990  
2991  
2992  
2993  
2994  
2995  
2996  
2997  
2998  
2999  
3000  
3001  
3002  
3003  
3004  
3005

3006 **14 REFERENCES**

3007

3008

3009

1. Bossert, J. M. *et al.* Effect of Selective Lesions of Nucleus Accumbens  $\mu$ -Opioid Receptor-Expressing Cells on Heroin Self-Administration in Male and Female Rats: A Study with Novel *Oprm1-Cre* Knock-in Rats. *J. Neurosci.* **43**, 1692–1713 (2023).

3010

3011

3012

2. Ibáñez Alcalá, R. J. *et al.* RECORD, a high-throughput, customizable system that unveils behavioral strategies leveraged by rodents during foraging-like decision-making. *Commun Biol* **7**, 822 (2024).

3013

3014

3015

3. Morigaki, R. *et al.* Spatiotemporal Up-Regulation of Mu Opioid Receptor 1 in Striatum of Mouse Model of Huntington's Disease Differentially Affecting Caudal and Striosomal Regions. *Front. Neuroanat.* **14**, 608060 (2020).

3016

3017

3018

4. Schwarz, L. A. *et al.* Viral-genetic tracing of the input-output organization of a central noradrenaline circuit. *Nature* **524**, 88–92 (2015).

3019

3020

5. Lavin, T. K., Jin, L. & Wickersham, I. R. Monosynaptic tracing: a step-by-step protocol. *J Chem Neuroanat* **102**, 101661 (2019).

3021

3022

6. Lavin, T. K., Jin, L., Lea, N. E. & Wickersham, I. R. Monosynaptic Tracing Success Depends Critically on Helper Virus Concentrations. *Front Synaptic Neurosci* **12**, 6 (2020).

3023

3024

7. Takahashi, Y. K. *et al.* Dopamine Neurons Respond to Errors in the Prediction of Sensory Features of Expected Rewards. *Neuron* **95**, 1395-1405.e3 (2017).

3025

3026

8. Beck, D. W. *et al.* A decision-space model explains context-specific decision-making. *Nature Communications* **16**, 7437 (2025).

3027

3028

9. Mathis, A. *et al.* DeepLabCut: markerless pose estimation of user-defined body parts with deep learning. *Nat Neurosci* **21**, 1281–1289 (2018).

3029

- 3030 10. Pietrzak, M. *et al.* Ghrelin decreases sensitivity to negative feedback and increases  
3031 prediction-error related caudate activity in humans, a randomized controlled trial.  
3032 *Neuropsychopharmacol.* **49**, 1042–1049 (2024).
- 3033 11. Schéle, E., Pfabigan, D. M., Simrén, J., Sailer, U. & Dickson, S. L. Ghrelin Induces Place  
3034 Preference for Social Interaction in the Larger Peer of a Male Rat Pair. *Neuroscience* **447**,  
3035 148–154 (2020).
- 3036 12. Beck, D. & Friedman, A. Striosome-dopamine circuit signals information gain, not  
3037 prediction error. Preprint at <https://doi.org/10.21203/rs.3.rs-7011645/v1> (2025).
- 3038 13. Ralevski, E. *et al.* Ghrelin is Related to Personality Differences in Reward Sensitivity and  
3039 Impulsivity. *Alcohol and Alcoholism* **53**, 52–56 (2018).
- 3040 14. Anderberg, R. H. *et al.* The Stomach-Derived Hormone Ghrelin Increases Impulsive  
3041 Behavior. *Neuropsychopharmacol* **41**, 1199–1209 (2016).  
3042
